# Supplementary material for: Target profiling of zerumbone using a novel cell-permeable clickable probe and quantitative chemical proteomics
Source: Royal Society of Chemistry journal article supplement (doi:10.1039/c4cc09527h), 2015-01-01
Supplement: c4cc09527h1.xlsx [file c4cc09527h1.xlsx]

## Sheet: Sheet1
						n=1				n=2				n=3																																			75µM Zer
						0 Zer	75 Zer	100 Zer	150 Zer	0 Zer	75 Zer	100 Zer	150 Zer	0 Zer	75 Zer	100 Zer	150 Zer																																Ratio of ratio
Gene names	Protein names	Protein IDs	Majority protein IDs	ANOVA Significant	(-log ANOVA p value)	Ratio H/L B35-1	Ratio H/L B35-2	Ratio H/L B35-3	Ratio H/L B35-4	Ratio H/L B35-5	Ratio H/L B35-6	Ratio H/L B35-7	Ratio H/L B35-8	Ratio H/L B35-9	Ratio H/L B35-10	Ratio H/L B35-11	Ratio H/L B35-12	Razor + unique peptides B35-1	Razor + unique peptides B35-2	Razor + unique peptides B35-3	Razor + unique peptides B35-4	Razor + unique peptides B35-5	Razor + unique peptides B35-6	Razor + unique peptides B35-7	Razor + unique peptides B35-8	Razor + unique peptides B35-9	Razor + unique peptides B35-10	Razor + unique peptides B35-11	Razor + unique peptides B35-12	Unique peptides B35-1	Unique peptides B35-2	Unique peptides B35-3	Unique peptides B35-4	Unique peptides B35-5	Unique peptides B35-6	Unique peptides B35-7	Unique peptides B35-8	Unique peptides B35-9	Unique peptides B35-10	Unique peptides B35-11	Unique peptides B35-12	Sequence coverage [%]	Unique + razor sequence coverage [%]	Unique sequence coverage [%]	Ratio H/L 0 Zer	Ratio H/L 75 Zer	Ratio H/L 100 Zer	Ratio H/L 150 Zer	ratio H/L 0 Zer/ ratio H/L 75 Zer
DFNA5	Non-syndromic hearing impairment protein 5	O60443;O60443-3;O60443-2	O60443;O60443-3	+	2.68014	0.88044	6.738	6.5058	8.0072	1.0751	7.2071	6.5534	6.671	1.1253	7.7849	11.644	10.249	9	8	7	14	15	5	8	10	16	5	9	5	9	8	7	14	15	5	8	10	16	5	9	5	51.2	51.2	51.2	1.0751	7.2071	6.5511	8.0072	0.149172
CDA	Cytidine deaminase	P32320	P32320	+	2.99599	1.2571	NaN	7.7224	8.5236	1.5142	NaN	5.655	NaN	1.6652	7.1131	6.7503	NaN	2	1	3	4	4	0	4	1	4	4	4	1	2	1	3	4	4	0	4	1	4	4	4	1	87	87	87	1.5142	7.1131	6.7503	8.5236	0.212875
UVRAG	UV radiation resistance-associated gene protein	Q9P2Y5	Q9P2Y5	+	3.11487	0.9925	6.3072	6.8908	4.0481	1.1621	4.3127	NaN	4.0448	1.3383	6.8341	6.4956	NaN	5	3	3	4	6	2	1	2	3	3	3	0	5	3	3	4	6	2	1	2	3	3	3	0	13.4	13.4	13.4	1.1621	6.3072	6.6932	4.04645	0.18425
NT5DC1	5-nucleotidase domain-containing protein 1	Q5TFE4	Q5TFE4	+	5.64821	1.0712	5.5981	6.3758	8.4802	1.2581	4.6718	5.1114	7.1808	1.3782	4.867	5.8253	8.1702	8	9	7	10	11	8	7	7	10	9	10	4	8	9	7	10	11	8	7	7	10	9	10	4	53.4	53.4	53.4	1.2581	4.867	5.8253	8.1702	0.258496
LCMT1	Leucine carboxyl methyltransferase 1	Q9UIC8-2;Q9UIC8;Q9UIC8-3	Q9UIC8-2;Q9UIC8;Q9UIC8-3	+	2.98124	0.97336	5.1931	5.7246	7.0781	1.1792	4.8931	4.606	6.006	1.2795	7.1846	7.2711	8.9206	7	6	6	4	12	7	6	7	12	9	7	4	7	6	6	4	12	7	6	7	12	9	7	4	41.7	41.7	41.7	1.1792	5.1931	5.7246	7.0781	0.227071
NT5DC2	5-nucleotidase domain-containing protein 2	Q9H857-2;Q9H857;Q9H857-3;Q9H857-4	Q9H857-2;Q9H857;Q9H857-3;Q9H857-4	+	2.7927	2.1697	5.4176	3.0486	6.5008	2.3964	5.0605	4.5544	6.5158	2.4549	3.7701	4.6778	NaN	6	7	4	9	8	2	7	4	14	13	12	1	6	7	4	9	8	2	7	4	14	13	12	1	52.3	52.3	52.3	2.3964	5.0605	4.5544	6.5083	0.47355
MAGED2	Melanoma-associated antigen D2	Q9UNF1;Q9UNF1-2;Q12816;Q9Y5V3-2;Q9Y5V3;Q12816-2	Q9UNF1;Q9UNF1-2	+	2.10124	1.7271	NaN	4.3385	3.9977	1.9933	NaN	3.2212	NaN	1.9528	3.1397	4.6573	NaN	3	1	2	3	3	1	5	1	6	5	3	1	3	1	2	3	3	1	5	1	6	5	3	1	24.1	24.1	24.1	1.9528	3.1397	4.3385	3.9977	0.62197
NR2F1;NR2F2	COUP transcription factor 1;COUP transcription factor 2	P10589;P24468;P24468-2;P24468-3;P10588	P10589;P24468;P24468-2;P24468-3		0.577154	NaN	NaN	NaN	6.3435	1.613	NaN	2.5432	NaN	1.6069	4.2608	6.0381	NaN	1	0	1	3	3	1	3	1	3	4	2	0	1	0	1	3	3	1	3	1	3	4	2	0	14.9	14.9	14.9	1.60995	4.2608	4.29065	6.3435	0.377852
FAM114A1	Protein NOXP20	Q8IWE2	Q8IWE2	+	3.80231	1.7943	4.6306	4.1537	5.9579	2.0178	3.2356	3.926	7.8843	2.1071	4.3839	5.0073	6.9087	4	6	8	8	9	5	9	6	12	8	10	6	4	6	8	8	9	5	9	6	12	8	10	6	47.4	47.4	47.4	2.0178	4.3839	4.1537	6.9087	0.460275
PSMD14	26S proteasome non-ATPase regulatory subunit 14	O00487	O00487		1.09426	0.84009	1.7227	NaN	4.6114	0.91825	NaN	2.7258	NaN	0.92053	3.5015	5.1721	NaN	2	3	1	2	5	0	3	1	4	3	2	0	2	3	1	2	5	0	3	1	4	3	2	0	37.1	37.1	37.1	0.91825	2.6121	3.94895	4.6114	0.351537
DYNC1LI1	Cytoplasmic dynein 1 light intermediate chain 1	Q9Y6G9;O43237	Q9Y6G9	+	1.45278	0.73089	NaN	3.7887	NaN	0.85104	1.0771	NaN	3.4582	0.91423	NaN	4.0236	1.1786	4	0	3	1	3	2	0	3	5	1	4	2	4	0	3	1	3	2	0	3	5	1	4	2	32.7	32.7	32.7	0.85104	1.0771	3.90615	2.3184	0.790122
TMPO	Lamina-associated polypeptide 2, isoform alpha;Thymopoietin;Thymopentin	P42166;P42167;P42167-2	P42166	+	5.02482	1.2691	2.8289	3.7674	4.7656	1.3035	2.5485	3.2029	5.6235	1.5771	3.2349	3.8001	5.8477	12	12	11	15	21	8	13	7	15	11	10	4	12	12	11	15	21	8	13	7	15	11	10	4	52	52	52	1.3035	2.8289	3.7674	5.6235	0.46078
CPPED1	Calcineurin-like phosphoesterase domain-containing protein 1	Q9BRF8;Q9BRF8-2	Q9BRF8;Q9BRF8-2	+	2.12312	0.90695	3.6848	3.1675	4.2579	1.0332	NaN	3.732	4.9043	1.2572	4.9218	5.8774	6.3381	3	2	2	2	4	0	2	2	3	3	5	2	3	2	2	2	4	0	2	2	3	3	5	2	16.6	16.6	16.6	1.0332	4.3033	3.732	4.9043	0.240095
MLKL	Mixed lineage kinase domain-like protein	Q8NB16;Q8NB16-2	Q8NB16	+	4.15593	0.76777	2.3159	3.9783	5.0452	0.87827	2.5349	2.7327	6.4868	0.93236	2.8038	3.5721	7.3729	14	11	9	7	16	4	7	3	17	7	6	3	14	11	9	7	16	4	7	3	17	7	6	3	47.8	47.8	47.8	0.87827	2.5349	3.5721	6.4868	0.346471
GCLC	Glutamate--cysteine ligase catalytic subunit	P48506;Q96N38;Q96N38-2;Q96N38-3	P48506	+	2.91702	0.74346	3.2316	3.4379	4.1442	0.82498	1.9058	2.771	3.6672	0.92808	3.5791	4.2852	3.6402	6	8	7	8	15	3	5	5	14	8	9	3	6	8	7	8	15	3	5	5	14	8	9	3	47.3	47.3	47.3	0.82498	3.2316	3.4379	3.6672	0.255285
NR3C1	Glucocorticoid receptor	P04150;P04150-3;P04150-8;P04150-10;P04150-2;P04150-6;P04150-9;P04150-5;P04150-7;P08235;P08235-4;P08235-3;P06401;P10275;P06401-2;P08235-2;P10275-2	P04150;P04150-3;P04150-8;P04150-10;P04150-2;P04150-6;P04150-9;P04150-5;P04150-7	+	5.5456	0.90864	2.6088	3.3267	5.1963	0.96377	2.3656	2.7374	6.3607	1.1114	2.9662	3.5024	5.7682	10	9	7	11	16	8	10	6	15	7	13	5	10	9	7	11	16	8	10	6	15	7	13	5	43.1	43.1	43.1	0.96377	2.6088	3.3267	5.7682	0.36943
BRAT1	BRCA1-associated ATM activator 1	Q6PJG6;Q6PJG6-3;Q6PJG6-2	Q6PJG6	+	3.8432	0.81348	1.9212	3.2467	6.6681	0.82784	NaN	3.2967	NaN	1.0073	2.4376	3.7142	NaN	6	8	6	7	12	0	6	2	16	9	4	0	6	8	6	7	12	0	6	2	16	9	4	0	47.3	47.3	47.3	0.82784	2.1794	3.2967	6.6681	0.379848
DUT	Deoxyuridine 5-triphosphate nucleotidohydrolase, mitochondrial	P33316-2;P33316	P33316-2;P33316	+	5.52268	1.2422	2.2204	3.1644	4.4427	1.4288	2.182	2.7627	4.9874	1.5178	2.8151	3.2268	4.5587	7	9	9	9	10	8	8	9	9	8	9	8	7	9	9	9	10	8	8	9	9	8	9	8	73.8	73.8	73.8	1.4288	2.2204	3.1644	4.5587	0.643488
ATXN10	Ataxin-10	Q9UBB4;Q9UBB4-2	Q9UBB4;Q9UBB4-2	+	5.12284	0.88414	2.6622	3.2652	3.7629	1.0398	2.2948	2.6392	4.131	1.1138	2.922	3.1348	3.675	15	19	16	18	22	11	16	17	20	21	19	13	15	19	16	18	22	11	16	17	20	21	19	13	68.4	68.4	68.4	1.0398	2.6622	3.1348	3.7629	0.390579
RIN1	Ras and Rab interactor 1	Q13671;Q13671-2;Q9Y4F4;Q9Y4F4-3;Q9Y4F4-2;REV__Q6QNY0	Q13671;Q13671-2		0.708182	0.46822	NaN	NaN	6.7982	0.55619	NaN	1.0082	NaN	0.61902	NaN	4.8918	NaN	3	1	1	2	5	1	2	1	3	1	2	0	3	1	1	2	5	1	2	1	3	1	2	0	22.5	22.5	22.5	0.55619	NaN	2.95	6.7982	#VALUE!
AIP	AH receptor-interacting protein	O00170	O00170	+	3.79909	1.4665	2.0793	2.9918	4.1258	1.5737	1.8619	2.7259	4.2068	1.7028	2.4214	2.8647	5.6007	10	9	6	6	11	6	7	6	9	10	9	3	10	9	6	6	11	6	7	6	9	10	9	3	54.8	54.8	54.8	1.5737	2.0793	2.8647	4.2068	0.756841
PSME2	Proteasome activator complex subunit 2	Q9UL46	Q9UL46	+	3.56497	1.5652	2.1848	2.7966	3.995	1.7742	2.0843	2.4765	4.0178	1.8214	2.7856	3.2885	4.9766	2	4	5	5	6	4	7	2	9	5	7	3	2	4	5	5	6	4	7	2	9	5	7	3	64.4	64.4	64.4	1.7742	2.1848	2.7966	4.0178	0.812065
RPS6KA1	Ribosomal protein S6 kinase alpha-1	Q15418-2;Q15418;Q15418-3;O15021;O15021-1;O15021-3;O15021-2;Q6P0Q8;Q6P0Q8-2;Q9Y2H9;O60307;Q96GX5;Q96GX5-3;Q96GX5-2	Q15418-2;Q15418;Q15418-3	+	1.67005	1.4053	2.4491	2.7594	3.05	0.54304	NaN	4.1837	3.7949	1.5229	2.6629	2.5925	NaN	3	5	2	2	2	0	3	4	3	4	4	0	3	4	2	2	2	0	3	3	3	4	4	0	23.4	16.1	14.7	1.4053	2.556	2.7594	3.42245	0.549804
SYNCRIP	Heterogeneous nuclear ribonucleoprotein Q	O60506-3;O60506;O60506-4;O60506-2;O60506-5	O60506-3;O60506;O60506-4;O60506-2;O60506-5	+	5.86393	0.88712	2.0302	2.6402	3.6058	0.95759	1.8221	2.1467	3.8931	1.04	2.2172	2.6775	3.584	20	22	19	24	22	20	20	20	22	21	21	17	16	17	15	19	18	16	15	16	17	16	16	13	48.2	48.2	39.7	0.95759	2.0302	2.6402	3.6058	0.471673
DDB2	DNA damage-binding protein 2	Q92466;Q92466-4;Q92466-2;Q92466-5;Q92466-3;REV__P09848	Q92466;Q92466-4;Q92466-2	+	4.15414	1.7354	2.2564	2.5644	3.1843	1.5785	2.196	2.4014	3.4754	1.7898	2.804	2.5338	3.6038	3	6	7	9	8	7	5	4	10	7	9	2	3	6	7	9	8	7	5	4	10	7	9	2	33.3	33.3	33.3	1.7354	2.2564	2.5338	3.4754	0.769101
MCMBP	Mini-chromosome maintenance complex-binding protein	Q9BTE3-2;Q9BTE3;Q9BTE3-3	Q9BTE3-2;Q9BTE3;Q9BTE3-3	+	4.61035	0.7924	2.0803	2.4068	2.8642	0.86038	1.8423	1.9583	3.1526	0.922	2.4511	2.526	3.2663	14	11	13	14	16	10	14	7	18	13	14	8	14	11	13	14	16	10	14	7	18	13	14	8	61.2	61.2	61.2	0.86038	2.0803	2.4068	3.1526	0.413585
HELLS	Lymphoid-specific helicase	Q9NRZ9;Q9NRZ9-2;Q9NRZ9-3;Q9NRZ9-4;Q9NRZ9-5;Q9NRZ9-6;Q9NRZ9-7;Q9NRZ9-8	Q9NRZ9;Q9NRZ9-2;Q9NRZ9-3;Q9NRZ9-4;Q9NRZ9-5;Q9NRZ9-6	+	2.00914	NaN	NaN	NaN	NaN	0.96878	1.9167	2.1588	3.3928	0.91929	NaN	2.4227	NaN	0	0	1	1	2	3	2	2	4	0	3	0	0	0	1	1	2	3	2	2	4	0	3	0	11.3	11.3	11.3	0.944035	1.9167	2.29075	3.3928	0.492531
HNRNPF	Heterogeneous nuclear ribonucleoprotein F;Heterogeneous nuclear ribonucleoprotein F, N-terminally processed	P52597	P52597	+	4.50374	0.97527	2.0556	2.2907	3.5342	1.0142	1.7264	1.8141	3.0703	1.164	2.2247	2.4078	3.1532	8	10	10	13	16	10	11	10	12	11	10	9	6	8	8	11	14	8	9	8	10	9	8	7	65.1	65.1	58.6	1.0142	2.0556	2.2907	3.1532	0.493384
ARFIP2	Arfaptin-2	P53365;P53365-2	P53365;P53365-2	+	1.6915	NaN	1.7906	2.2823	NaN	1.1229	1.4973	1.9011	2.9865	1.3194	2.0662	2.3007	NaN	1	1	1	1	2	2	1	1	1	1	3	0	1	1	1	1	2	2	1	1	1	1	3	0	16.7	16.7	16.7	1.22115	1.7906	2.2823	2.9865	0.681978
UQCRC1	Cytochrome b-c1 complex subunit 1, mitochondrial	P31930	P31930	+	3.67686	0.89053	1.94	2.276	2.6111	1.1513	1.9743	2.0234	2.5845	1.135	2.5425	2.5907	2.5786	4	5	5	9	9	3	4	4	6	5	6	2	4	5	5	9	9	3	4	4	6	5	6	2	35.4	34	34	1.135	1.9743	2.276	2.5845	0.574887
MCCC2	Methylcrotonoyl-CoA carboxylase beta chain, mitochondrial	Q9HCC0;Q9HCC0-2	Q9HCC0;Q9HCC0-2		0.424317	NaN	1.6859	2.2646	5.3341	1.3898	NaN	NaN	NaN	1.5257	5.2267	NaN	NaN	1	2	2	3	3	0	1	1	2	3	1	1	1	2	2	3	3	0	1	1	2	3	1	1	14.9	14.9	14.9	1.45775	3.4563	2.2646	5.3341	0.421766
DHX15	Putative pre-mRNA-splicing factor ATP-dependent RNA helicase DHX15	O43143;O60231	O43143	+	3.75868	1.3452	1.8998	2.2691	2.6378	1.5235	1.7914	1.7899	2.7226	1.5085	2.0688	2.2228	2.5361	11	14	9	14	18	10	11	10	16	16	13	7	11	14	9	13	17	9	11	10	15	15	13	6	37	37	35.8	1.5085	1.8998	2.2228	2.6378	0.794031
FASN	Fatty acid synthase;[Acyl-carrier-protein] S-acetyltransferase;[Acyl-carrier-protein] S-malonyltransferase;3-oxoacyl-[acyl-carrier-protein] synthase;3-oxoacyl-[acyl-carrier-protein] reductase;3-hydroxypalmitoyl-[acyl-carrier-protein] dehydratase;Enoyl-[acyl-carrier-protein] reductase;Oleoyl-[acyl-carrier-protein] hydrolase	P49327	P49327		1.06152	1.8285	2.0148	2.2098	2.3659	2.1834	1.8975	1.8563	2.6373	2.2706	2.3382	2.2841	2.5924	51	76	57	70	73	51	56	48	68	64	69	43	51	76	57	70	73	51	56	48	68	64	69	43	55.9	55.9	55.9	2.1834	2.0148	2.2098	2.5924	1.08368
HMGCS1	Hydroxymethylglutaryl-CoA synthase, cytoplasmic	Q01581;P54868;P54868-2	Q01581		0.220474	NaN	2.0249	2.135	2.3775	NaN	NaN	NaN	NaN	1.7506	2.8129	2.2166	NaN	1	2	2	3	1	0	1	1	2	2	2	0	1	2	2	3	1	0	1	1	2	2	2	0	15.8	15.8	15.8	1.7506	2.4189	2.1758	2.3775	0.723717
SELENBP1	Selenium-binding protein 1	Q13228;Q13228-2	Q13228;Q13228-2		0.178802	2.5862	2.4003	2.8645	2.4841	2.5506	2.1014	2.1608	NaN	2.9612	3.1611	2.1083	NaN	3	5	5	6	3	3	4	1	6	8	4	0	3	5	5	6	3	3	4	1	6	8	4	0	25.2	25.2	25.2	2.5862	2.4003	2.1608	2.4841	1.07745
SMN1	Survival motor neuron protein	Q16637;Q16637-3;Q16637-2;Q16637-4	Q16637;Q16637-3;Q16637-2;Q16637-4		0.537207	NaN	1.3781	NaN	1.5391	0.8747	NaN	NaN	NaN	0.97018	3.5163	2.092	NaN	0	2	1	3	2	0	0	0	2	2	2	0	0	2	1	3	2	0	0	0	2	2	2	0	28.6	28.6	28.6	0.92244	2.4472	2.092	1.5391	0.376937
FBXO30	F-box only protein 30	Q8TB52	Q8TB52	+	2.89978	1.3282	1.5741	2.2797	2.6176	1.5317	1.723	1.6491	2.619	1.6956	1.9105	2.0913	3.1074	2	2	4	4	4	3	2	3	5	6	7	2	2	2	4	4	4	3	2	3	5	6	7	2	10.5	10.5	10.5	1.5317	1.723	2.0913	2.619	0.888973
NUBP2	Cytosolic Fe-S cluster assembly factor NUBP2	Q9Y5Y2	Q9Y5Y2	+	3.92879	1.0653	1.6581	2.0765	2.4304	1.2396	1.4884	1.6985	3.0172	1.3146	1.7143	2.1486	2.8026	4	6	6	6	7	4	6	5	6	6	6	5	4	6	6	6	7	4	6	5	6	6	6	5	52	52	52	1.2396	1.6581	2.0765	2.8026	0.747603
CPS1	Carbamoyl-phosphate synthase [ammonia], mitochondrial	P31327;P31327-2	P31327;P31327-2	+	1.50507	2.0992	2.0706	2.0693	2.4156	2.56	1.9261	1.7908	2.6037	2.626	2.2302	2.1756	2.5374	17	21	17	30	24	17	26	11	26	28	33	11	16	20	16	29	22	17	26	11	25	25	31	11	40.1	40.1	38.6	2.56	2.0706	2.0693	2.5374	1.23636
ANXA2	Annexin A2	P07355-2;P07355	P07355-2;P07355	+	3.59432	1.3647	1.7728	2.0468	2.5575	1.5562	1.6085	1.7033	2.8759	1.6868	1.9745	2.1206	2.7527	28	32	28	29	31	32	30	29	31	30	28	28	7	11	7	9	10	10	9	8	10	9	9	7	73.9	73.9	23.8	1.5562	1.7728	2.0468	2.7527	0.87782
TIGAR	Probable fructose-2,6-bisphosphatase TIGAR	Q9NQ88	Q9NQ88	+	1.87685	0.99425	NaN	2.0341	2.5674	1.2383	1.382	1.4763	2.7983	1.1929	2.0569	2.3464	NaN	3	1	2	3	5	3	4	2	5	4	4	1	3	1	2	3	5	3	4	2	5	4	4	1	34.1	34.1	34.1	1.1929	1.71945	2.0341	2.68285	0.693768
HNRNPR	Heterogeneous nuclear ribonucleoprotein R	O43390;O43390-2	O43390;O43390-2	+	6.02921	1.0392	1.754	2.0122	2.9188	1.2453	1.6468	1.8619	2.7986	1.3183	1.8171	2.1674	2.8818	8	6	10	9	11	9	9	6	10	11	9	5	8	6	10	9	11	9	9	6	10	11	9	5	36	28.4	28.4	1.2453	1.754	2.0122	2.8818	0.709977
TBC1D4	TBC1 domain family member 4	O60343;O60343-3;O60343-2;O60343-5;O60343-4;Q86TI0;Q86TI0-2	O60343;O60343-3;O60343-2	+	1.86736	NaN	1.5072	1.9137	2.529	1.1724	2.1079	NaN	2.3619	1.304	1.605	2.087	NaN	1	4	6	6	9	2	2	4	8	9	7	0	1	4	6	6	9	2	2	4	8	9	7	0	22	22	22	1.2382	1.605	2.00035	2.44545	0.771464
PDE3A	cGMP-inhibited 3,5-cyclic phosphodiesterase A	Q14432;Q13370	Q14432	+	4.21637	1.0938	1.6172	1.9918	2.9758	1.4122	1.6485	1.8057	3.0562	1.4122	2.1084	2.3322	3.1434	7	8	4	8	12	8	9	7	12	10	8	4	7	8	4	8	12	8	9	7	12	10	8	4	28	28	28	1.4122	1.6485	1.9918	3.0562	0.856658
SEC24D	Protein transport protein Sec24D	O94855-2;O94855	O94855-2;O94855		0.997149	NaN	1.7732	1.7928	2.5465	2.0453	NaN	NaN	2.3474	1.6598	1.7897	2.1856	NaN	0	3	2	5	2	2	2	2	5	4	6	1	0	3	2	5	2	2	2	2	5	4	6	1	15.5	15.5	15.5	1.85255	1.78145	1.9892	2.44695	1.03991
HSPB1	Heat shock protein beta-1	P04792	P04792	+	4.33118	1.1991	1.628	1.9622	2.9416	1.4197	1.531	1.5396	3.0009	1.5214	1.9903	2.015	3.1621	12	14	12	12	14	12	13	11	14	13	12	11	12	14	12	12	14	12	13	11	14	13	12	11	78	78	78	1.4197	1.628	1.9622	3.0009	0.872052
PSME1	Proteasome activator complex subunit 1	Q06323	Q06323		0.0414658	NaN	NaN	1.2737	2.8485	1.9273	NaN	NaN	NaN	1.7885	2.363	2.6167	NaN	0	1	2	5	2	1	1	0	7	4	5	0	0	1	2	5	2	1	1	0	7	4	5	0	42.2	42.2	42.2	1.8579	2.363	1.9452	2.8485	0.786246
PCBP1	Poly(rC)-binding protein 1	Q15365;P57723;P57723-2	Q15365	+	4.89913	1.1062	1.6859	1.9395	2.6577	1.2698	1.4901	1.7462	2.7952	1.3199	1.884	2.1141	2.7816	16	18	16	17	17	16	16	15	15	16	16	16	12	14	12	13	13	12	12	12	11	12	12	12	84.8	84.8	73.9	1.2698	1.6859	1.9395	2.7816	0.753188
MAP7	Ensconsin	Q14244;Q14244-3;Q14244-5;Q14244-2;Q14244-4	Q14244;Q14244-3;Q14244-5;Q14244-2;Q14244-4	+	1.38109	1.5718	1.7233	1.9197	2.3961	1.7178	1.6801	1.6806	1.8905	1.5586	2.1239	1.9254	2.6116	3	3	7	4	4	2	5	4	5	5	7	3	3	3	7	4	4	2	5	4	5	5	7	3	17.8	17.8	17.8	1.5718	1.7233	1.9197	2.3961	0.912087
RRM1	Ribonucleoside-diphosphate reductase large subunit	P23921	P23921	+	3.07405	1.3597	1.7529	1.9192	2.3928	1.6544	1.5998	1.7279	2.7103	1.7218	1.9688	2.1183	2.6802	22	26	24	28	29	26	21	25	29	28	24	22	22	26	24	28	29	26	21	25	29	28	24	22	61.9	61.9	61.9	1.6544	1.7529	1.9192	2.6802	0.943807
DCTN2	Dynactin subunit 2	Q13561-2;Q13561-3;Q13561	Q13561-2;Q13561-3;Q13561		0.858664	NaN	1.6221	NaN	2.3857	1.2038	NaN	1.6535	NaN	1.2486	2.0083	2.1458	NaN	1	3	0	5	6	1	3	1	5	3	4	1	1	3	0	5	6	1	3	1	5	3	4	1	28.8	28.8	28.8	1.2262	1.8152	1.89965	2.3857	0.675518
SPG20	Spartin	Q8N0X7	Q8N0X7	+	5.00242	0.88091	1.3684	1.8994	2.8189	0.96208	1.2934	1.5289	3.3073	1.0122	1.6044	2.0379	2.9259	5	8	6	5	9	7	4	5	14	10	9	3	5	8	6	5	9	7	4	5	14	10	9	3	34.2	34.2	34.2	0.96208	1.3684	1.8994	2.9259	0.703069
SMAD2;SMAD3	Mothers against decapentaplegic homolog 2;Mothers against decapentaplegic homolog 3	Q15796;Q15796-2;P84022;P84022-2;P84022-3;O15198;O15198-2;Q15797;Q99717	Q15796;Q15796-2;P84022;P84022-2;P84022-3		0.964247	NaN	1.756	NaN	2.6557	1.6738	NaN	2.0929	3.2912	2.2287	NaN	1.6963	NaN	1	3	1	3	4	0	3	2	2	1	2	0	1	3	1	3	4	0	3	2	2	1	2	0	12.2	12.2	12.2	1.95125	1.756	1.8946	2.97345	1.11119
HUWE1	E3 ubiquitin-protein ligase HUWE1	Q7Z6Z7;Q7Z6Z7-3;Q7Z6Z7-2	Q7Z6Z7;Q7Z6Z7-3;Q7Z6Z7-2		0.751435	0.99786	1.3446	NaN	1.4051	1.2015	NaN	1.6414	1.779	1.5004	1.6227	2.1117	NaN	2	9	0	2	4	0	3	2	5	4	2	0	2	9	0	2	4	0	3	2	5	4	2	0	5.2	5.2	5.2	1.2015	1.48365	1.87655	1.59205	0.809827
KIAA0391	Mitochondrial ribonuclease P protein 3	O15091;O15091-2;O15091-4;O15091-3	O15091;O15091-2;O15091-4	+	2.82769	NaN	NaN	1.8764	3.7948	1.2308	NaN	1.4452	4.13	1.4089	1.8679	2.1521	NaN	1	2	3	2	2	1	2	4	3	3	2	0	1	2	3	2	2	1	2	4	3	3	2	0	17.3	17.3	17.3	1.31985	1.8679	1.8764	3.9624	0.706596
IPO5	Importin-5	O00410-3;O00410;O00410-2	O00410-3;O00410;O00410-2	+	4.8451	0.86761	1.5445	1.8753	2.1907	0.98171	1.3824	1.562	2.3907	1.0339	1.663	1.8628	2.2411	30	39	41	36	40	34	34	34	36	35	38	29	29	37	40	36	39	34	33	32	36	35	38	28	65.3	65.3	63.6	0.98171	1.5445	1.8628	2.2411	0.635617
GOPC	Golgi-associated PDZ and coiled-coil motif-containing protein	Q9HD26;Q9HD26-2;Q9HD26-3	Q9HD26;Q9HD26-2;Q9HD26-3	+	5.8811	1.1741	1.5803	1.8528	2.5318	1.4094	1.5932	1.8011	2.6502	1.1842	1.6321	2.0587	2.6481	2	4	3	7	3	2	5	5	9	7	9	2	2	4	3	7	3	2	5	5	9	7	9	2	36.1	36.1	36.1	1.1842	1.5932	1.8528	2.6481	0.743284
MOCOS	Molybdenum cofactor sulfurase	Q96EN8	Q96EN8	+	2.13879	1.1563	1.9538	1.8492	2.9285	1.2641	1.3209	1.5873	3.3842	1.404	2.284	2.5007	NaN	4	7	4	7	8	2	5	4	7	5	6	1	4	7	4	7	8	2	5	4	7	5	6	1	25.6	25.6	25.6	1.2641	1.9538	1.8492	3.15635	0.646996
C5orf51	UPF0600 protein C5orf51	A6NDU8	A6NDU8		0.671068	NaN	1.4262	1.6479	2.4074	NaN	1.0967	NaN	1.8534	1.3367	1.8287	2.0187	NaN	1	2	3	2	1	3	1	2	3	3	3	1	1	2	3	2	1	3	1	2	3	3	3	1	27.6	27.6	27.6	1.3367	1.4262	1.8333	2.1304	0.937246
HSPB8	Heat shock protein beta-8	Q9UJY1	Q9UJY1	+	1.73468	NaN	1.3271	1.9407	2.5124	0.84152	NaN	NaN	NaN	0.94197	1.5846	1.705	NaN	1	3	2	2	3	1	1	0	4	2	2	0	1	3	2	2	3	1	1	0	4	2	2	0	30.6	30.6	30.6	0.891745	1.45585	1.82285	2.5124	0.612525
FDPS	Farnesyl pyrophosphate synthase	P14324	P14324		0.879331	1.4735	1.5796	1.8001	1.8948	1.7581	1.3648	1.6338	2.4568	1.9643	1.7929	1.8308	NaN	2	3	4	4	4	2	4	5	5	3	5	1	2	3	4	4	4	2	4	5	5	3	5	1	30.5	30.5	30.5	1.7581	1.5796	1.8001	2.1758	1.113
HAT1	Histone acetyltransferase type B catalytic subunit	O14929;O14929-2;REV__Q7LFX5;REV__Q7LFX5-2	O14929;O14929-2	+	1.57887	1.5424	1.5625	1.7973	1.9904	1.5993	1.5456	1.447	2.3095	1.7492	1.9177	1.8596	2.1374	3	6	4	9	7	5	5	6	7	8	6	5	3	6	4	9	7	5	5	6	7	8	6	5	38.2	38.2	38.2	1.5993	1.5625	1.7973	2.1374	1.02355
BID	BH3-interacting domain death agonist;BH3-interacting domain death agonist p15;BH3-interacting domain death agonist p13;BH3-interacting domain death agonist p11	P55957-2;P55957;P55957-4	P55957-2;P55957;P55957-4		0.541631	NaN	1.3099	1.969	NaN	1.3741	1.2828	1.3286	NaN	1.438	1.5596	1.7899	NaN	0	2	2	1	2	2	1	1	2	2	2	0	0	2	2	1	2	2	1	1	2	2	2	0	17	17	17	1.40605	1.3099	1.7899	NaN	1.0734
STAT3	Signal transducer and activator of transcription 3	P40763	P40763	+	3.07105	1.2499	1.4407	1.785	2.2092	1.3067	1.2586	1.3653	2.3873	1.5093	1.6823	1.7903	2.3203	8	18	15	17	21	12	15	10	17	19	18	9	1	1	0	1	1	1	0	1	1	1	1	0	52.5	52.5	2.9	1.3067	1.4407	1.785	2.3203	0.90699
RARS	Arginine--tRNA ligase, cytoplasmic	P54136;P54136-2	P54136;P54136-2	+	4.56856	0.85719	1.4942	1.7788	2.1888	0.97076	1.3288	1.4602	2.3077	1.006	1.6856	1.8199	2.362	22	26	27	31	31	26	27	22	32	33	30	17	22	26	27	31	31	26	27	22	32	33	30	17	72.6	72.6	72.6	0.97076	1.4942	1.7788	2.3077	0.649685
CKAP5	Cytoskeleton-associated protein 5	Q14008-3;Q14008;Q14008-2;Q15020	Q14008-3;Q14008;Q14008-2	+	3.29194	0.75666	1.4331	2.0849	2.366	0.77133	1.4665	1.6565	2.9654	0.89684	1.5919	1.7616	2.0193	12	16	18	18	30	12	10	10	31	27	14	3	12	16	18	18	30	12	10	10	31	27	14	3	33.2	33.2	33.2	0.77133	1.4665	1.7616	2.366	0.525967
EIF3F	Eukaryotic translation initiation factor 3 subunit F	O00303	O00303	+	3.55193	0.63836	1.2494	1.7459	2.249	0.61699	1.067	1.2622	2.6581	0.67689	1.2183	1.9504	NaN	3	4	2	6	7	3	5	1	6	5	5	1	3	4	2	6	7	3	5	1	6	5	5	1	33.6	33.6	33.6	0.63836	1.2183	1.7459	2.45355	0.523976
TBC1D15	TBC1 domain family member 15	Q8TC07-2;Q8TC07	Q8TC07-2;Q8TC07	+	3.05962	1.0001	1.666	1.7396	2.4336	1.2206	NaN	1.5814	2.3599	1.2917	1.821	1.9921	NaN	3	4	3	6	7	2	4	3	8	8	8	1	3	4	3	6	7	2	4	3	8	8	8	1	20	20	20	1.2206	1.7435	1.7396	2.39675	0.700086
PLEKHA2	Pleckstrin homology domain-containing family A member 2	Q9HB19	Q9HB19	+	4.39449	1.0233	1.3895	1.958	2.9243	1.0886	1.4186	1.6236	3.1632	1.304	1.7073	1.7371	2.5593	8	9	7	6	8	7	5	4	9	6	8	3	8	9	7	6	8	7	5	4	9	6	8	3	34.4	34.4	34.4	1.0886	1.4186	1.7371	2.9243	0.767376
LIMCH1	LIM and calponin homology domains-containing protein 1	Q9UPQ0;Q9UPQ0-4;Q9UPQ0-2;Q9UPQ0-3;Q9UPQ0-5;Q9UPQ0-6;Q9UPQ0-8;Q9UPQ0-9;Q9UPQ0-7	Q9UPQ0;Q9UPQ0-4;Q9UPQ0-2;Q9UPQ0-3;Q9UPQ0-5;Q9UPQ0-6;Q9UPQ0-8;Q9UPQ0-9	+	2.29904	1.1243	1.4338	1.7401	2.0506	1.3019	1.2167	1.4626	2.017	1.5555	1.691	1.7137	2.1114	3	6	11	10	8	9	7	4	5	9	7	3	3	6	11	10	8	9	7	4	5	9	7	3	20.3	20.3	20.3	1.3019	1.4338	1.7137	2.0506	0.908007
USP48	Ubiquitin carboxyl-terminal hydrolase 48	Q86UV5;Q86UV5-2;Q86UV5-3;Q86UV5-5;Q86UV5-7;Q86UV5-4;Q86UV5-6	Q86UV5;Q86UV5-2	+	1.43464	NaN	NaN	1.6951	2.2316	1.3205	NaN	1.4845	3.0261	1.5388	1.6976	1.8142	NaN	0	0	3	5	4	1	2	2	2	4	4	0	0	0	3	5	4	1	2	2	2	4	4	0	11.1	11.1	11.1	1.42965	1.6976	1.6951	2.62885	0.84216
TELO2	Telomere length regulation protein TEL2 homolog	Q9Y4R8	Q9Y4R8		1.22015	0.66626	1.1775	1.7308	2.3125	1.0295	NaN	1.3689	NaN	1.1483	1.6538	1.6844	NaN	2	7	2	5	6	1	5	0	7	7	5	0	2	7	2	5	6	1	5	0	7	7	5	0	28.6	28.6	28.6	1.0295	1.41565	1.6844	2.3125	0.727228
TK1	Thymidine kinase, cytosolic	P04183	P04183	+	4.76569	0.7725	1.2197	1.6804	2.3685	0.86131	1.2542	1.4895	2.6365	0.9448	1.4614	1.9408	2.8662	9	9	10	10	10	8	9	4	10	13	10	4	9	9	10	10	10	8	9	4	10	13	10	4	67.5	67.5	67.5	0.86131	1.2542	1.6804	2.6365	0.686741
ATP6V1A	V-type proton ATPase catalytic subunit A	P38606	P38606	+	2.54644	1.1813	1.4232	1.676	1.9666	1.355	1.4784	1.4291	2.1191	1.4681	1.7497	1.8245	2.2657	14	21	16	21	21	17	21	15	23	23	22	15	14	21	16	21	21	17	21	15	23	23	22	15	69.9	69.9	69.9	1.355	1.4784	1.676	2.1191	0.916531
FAM120A	Constitutive coactivator of PPAR-gamma-like protein 1	Q9NZB2-6;Q9NZB2;Q9NZB2-4;Q9NZB2-5;Q9NZB2-2;Q9NX05;Q5T035	Q9NZB2-6;Q9NZB2;Q9NZB2-4;Q9NZB2-5;Q9NZB2-2		1.12366	NaN	1.337	1.6302	1.5411	0.93341	1.0911	NaN	NaN	1.0245	1.6699	1.6791	NaN	1	4	5	6	9	2	1	0	5	5	4	0	1	4	5	6	9	2	1	0	5	5	4	0	19.8	19.8	19.8	0.978955	1.337	1.65465	1.5411	0.732203
MSH2	DNA mismatch repair protein Msh2	P43246	P43246		0.36176	NaN	1.8297	1.646	1.8101	1.4103	1.3203	1.5226	1.8536	1.5185	1.9786	1.7565	NaN	1	4	2	6	7	3	3	3	5	4	5	1	1	4	2	6	7	3	3	3	5	4	5	1	16.5	16.5	16.5	1.4644	1.8297	1.646	1.83185	0.80035
RPS6KA3	Ribosomal protein S6 kinase alpha-3	P51812;Q9UK32	P51812	+	2.37767	0.99221	1.7	1.6129	2.2422	1.1465	1.1466	1.6243	2.816	1.213	1.7405	1.9775	NaN	8	11	6	11	12	5	9	8	14	13	13	1	5	7	5	7	8	4	6	4	9	8	7	1	35.5	35.5	25.3	1.1465	1.7	1.6243	2.5291	0.674412
S100A4	Protein S100-A4	P26447	P26447		0.833312	1.5799	1.5743	1.6229	1.8176	1.8151	1.358	1.3452	1.8428	2.0003	1.7517	1.7019	1.8793	3	3	3	3	3	3	2	2	3	4	3	4	3	3	3	3	3	3	2	2	3	4	3	4	57.4	57.4	57.4	1.8151	1.5743	1.6229	1.8428	1.15296
NME1	Nucleoside diphosphate kinase A	P15531-2;P15531	P15531-2;P15531		1.21816	NaN	NaN	1.606	1.7911	1.2458	1.1323	1.366	2.437	1.324	1.4583	1.6451	NaN	1	1	1	1	1	1	1	1	2	1	1	1	1	1	1	1	1	1	1	1	2	1	1	1	74	21.5	21.5	1.2849	1.2953	1.606	2.11405	0.991971
S100A2	Protein S100-A2	P29034	P29034		0.733926	1.565	1.5078	1.5928	1.7516	1.874	1.3501	1.4514	1.9639	2.1163	1.7486	1.8866	2.0641	2	3	3	3	2	3	4	3	4	4	3	3	2	3	3	3	2	3	4	3	4	4	3	3	27.6	27.6	27.6	1.874	1.5078	1.5928	1.9639	1.24287
CDK5	Cyclin-dependent kinase 5	Q00535;Q00535-2	Q00535;Q00535-2	+	1.69844	1.3383	1.4793	1.8878	1.9159	1.5165	1.2742	1.4328	2.2545	1.5942	1.7514	1.5915	2.0646	2	4	3	4	4	3	4	3	7	5	5	2	2	4	3	4	4	3	4	3	7	5	5	2	28.1	25.3	25.3	1.5165	1.4793	1.5915	2.0646	1.02515
PRKDC	DNA-dependent protein kinase catalytic subunit	P78527;P78527-2	P78527;P78527-2		0.992832	1.6422	1.8071	1.5871	1.6905	1.4793	1.8259	1.563	1.8055	1.6944	2.1423	1.8038	NaN	10	58	14	30	20	10	12	8	18	17	14	0	10	58	14	30	20	10	12	8	18	17	14	0	21.9	21.9	21.9	1.6422	1.8259	1.5871	1.748	0.899392
ANKRD17	Ankyrin repeat domain-containing protein 17	O75179;O75179-2;O75179-4;O75179-3;O75179-5	O75179;O75179-2;O75179-4;O75179-3;O75179-5	+	2.41983	NaN	0.95209	1.4724	1.9115	NaN	1.0639	1.5462	NaN	1.2478	NaN	1.6065	NaN	1	2	3	2	1	2	2	1	3	1	2	0	0	1	1	0	0	1	0	0	1	0	1	0	4.8	4.8	1.4	1.2478	1.008	1.5462	1.9115	1.2379
PREP	Prolyl endopeptidase	P48147	P48147	+	3.71702	1.0485	1.3241	1.5423	1.9778	1.1294	1.1352	1.2292	2.0508	1.2496	1.4169	1.5793	2.0274	7	11	12	13	14	9	11	8	16	13	17	7	7	11	12	13	14	9	11	8	16	13	17	7	46.1	46.1	46.1	1.1294	1.3241	1.5423	2.0274	0.852957
ACLY	ATP-citrate synthase	P53396;P53396-2;REV__Q12767-2;REV__Q12767	P53396;P53396-2		1.05895	1.5403	1.4171	1.5373	1.7023	1.728	1.286	1.3241	1.9022	1.8295	1.679	1.6944	1.8756	39	46	47	50	45	46	46	41	45	47	47	42	39	46	47	50	45	46	46	41	45	47	47	42	63.3	63.3	63.3	1.728	1.4171	1.5373	1.8756	1.21939
OSBP	Oxysterol-binding protein 1	P22059;Q969R2	P22059	+	2.39038	1.0263	1.3152	1.6041	1.8488	1.1414	1.0123	1.3203	2.2153	1.108	1.4789	1.5357	NaN	2	3	3	4	2	3	2	2	6	4	4	1	2	3	3	4	2	3	2	2	6	4	4	1	16	16	16	1.108	1.3152	1.5357	2.03205	0.842457
FADD	Protein FADD	Q13158	Q13158		0.541966	NaN	1.1019	1.5297	2.2576	0.83285	NaN	1.3101	NaN	NaN	1.4289	1.5976	NaN	1	2	4	3	4	1	5	1	1	2	4	0	1	2	4	3	4	1	5	1	1	2	4	0	47.1	47.1	47.1	0.83285	1.2654	1.5297	2.2576	0.658171
NCDN	Neurochondrin	Q9UBB6-3;Q9UBB6;Q9UBB6-2	Q9UBB6-3;Q9UBB6;Q9UBB6-2		0.10352	NaN	1.0544	NaN	1.3601	1.1363	NaN	0.96882	NaN	1.1582	1.854	2.0846	NaN	1	1	1	5	3	1	2	0	2	3	2	0	1	1	1	5	3	1	2	0	2	3	2	0	15.9	15.9	15.9	1.14725	1.4542	1.52671	1.3601	0.788922
MMS19	MMS19 nucleotide excision repair protein homolog	Q96T76-8;Q96T76;Q96T76-9;Q96T76-5;Q96T76-7	Q96T76-8;Q96T76;Q96T76-9;Q96T76-5	+	2.80346	0.90407	1.2189	1.5714	1.8924	1.0182	1.1606	1.4451	2.4164	1.099	1.4272	1.5256	1.7372	4	7	7	7	10	5	6	3	12	10	10	2	4	7	7	7	10	5	6	3	12	10	10	2	35.1	35.1	35.1	1.0182	1.2189	1.5256	1.8924	0.835343
AARS	Alanine--tRNA ligase, cytoplasmic	P49588	P49588	+	4.81375	0.81152	1.274	1.5227	1.9878	0.90972	1.1388	1.2966	2.2263	0.95016	1.425	1.5752	2.1185	15	19	18	23	26	15	17	16	26	25	23	18	15	19	18	23	26	15	17	16	26	25	23	18	55.5	55.5	55.5	0.90972	1.274	1.5227	2.1185	0.714066
IMPDH1	Inosine-5-monophosphate dehydrogenase 1	P20839-3;P20839;P20839-4;P20839-2	P20839-3;P20839;P20839-4;P20839-2	+	2.61954	0.93178	1.3091	1.5208	2.1832	1.0839	1.1231	1.1856	2.1541	1.2111	1.5695	1.6327	NaN	4	5	5	2	5	3	5	3	6	8	7	0	4	5	5	2	5	3	5	3	6	8	7	0	31.1	28.4	28.4	1.0839	1.3091	1.5208	2.16865	0.827973
MATR3	Matrin-3	P43243;P43243-2	P43243		1.05439	NaN	1.6682	1.6042	1.3258	1.0145	NaN	NaN	1.4086	1.3687	1.7503	1.4293	NaN	0	3	3	4	3	0	1	2	6	4	3	0	0	3	3	4	3	0	1	2	6	4	3	0	16.1	16.1	16.1	1.1916	1.70925	1.51675	1.3672	0.697148
PDE4D	cAMP-specific 3,5-cyclic phosphodiesterase 4D	Q08499-6;Q08499;Q08499-11;Q08499-9;Q08499-10;Q08499-2;Q08499-3;Q08499-4;Q08499-8;Q08499-5;Q08499-12;Q08499-7;P27815;P27815-7;P27815-2;P27815-6;Q07343;Q07343-3;Q08493;P27815-3;Q08493-3;P27815-4;Q08493-2;Q07343-2;P27815-5	Q08499-6;Q08499;Q08499-11;Q08499-9;Q08499-10;Q08499-2;Q08499-3;Q08499-4;Q08499-8;Q08499-5	+	1.56583	1.1984	1.2004	1.5131	1.8391	1.3801	1.2057	1.2576	2.024	1.5339	1.6176	1.8835	2.0911	2	4	3	8	5	2	4	3	8	6	8	2	2	4	3	8	5	2	4	3	8	6	8	2	30.7	30.7	30.7	1.3801	1.2057	1.5131	2.024	1.14465
NDUFS3	NADH dehydrogenase [ubiquinone] iron-sulfur protein 3, mitochondrial	O75489	O75489	+	1.32149	0.78634	1.7818	NaN	3.1842	1.1988	1.4488	1.504	NaN	0.8954	NaN	NaN	NaN	4	2	1	4	2	3	3	1	5	1	1	0	4	2	1	4	2	3	3	1	5	1	1	0	31.4	31.4	31.4	0.8954	1.6153	1.504	3.1842	0.554324
SDHA	Succinate dehydrogenase [ubiquinone] flavoprotein subunit, mitochondrial	P31040	P31040	+	1.7777	1.2298	1.342	1.5023	1.8798	1.5412	1.364	1.2303	1.9517	1.6148	1.6363	1.5911	1.931	8	13	16	17	14	10	12	12	13	14	15	8	8	13	16	17	14	10	12	12	13	14	15	8	50.6	50.6	50.6	1.5412	1.364	1.5023	1.931	1.12991
PDCD6IP	Programmed cell death 6-interacting protein	Q8WUM4	Q8WUM4	+	3.63347	0.89718	1.2913	1.4997	1.8471	1.055	1.1404	1.2696	2.0858	1.1153	1.4405	1.5945	1.9469	26	32	27	35	35	29	28	24	38	39	32	21	26	32	27	35	35	29	28	24	38	39	32	21	67.7	67.7	67.7	1.055	1.2913	1.4997	1.9469	0.817006
MYBBP1A	Myb-binding protein 1A	Q9BQG0-2;Q9BQG0	Q9BQG0-2;Q9BQG0	+	1.82169	0.91785	1.3821	1.4914	2.4624	0.9439	1.0894	1.2799	NaN	1	1.4474	1.6136	NaN	3	5	4	5	11	6	4	1	13	13	10	0	3	5	4	5	11	6	4	1	13	13	10	0	21.8	21.8	21.8	0.9439	1.3821	1.4914	2.4624	0.682946
PALLD	Palladin	Q8WX93;Q8WX93-3;Q8WX93-5;Q8WX93-8;Q8WX93-9;Q8WX93-2;Q8WX93-4;Q8WX93-7;Q8WX93-6;Q86TC9;Q86TC9-2	Q8WX93;Q8WX93-3;Q8WX93-5;Q8WX93-8;Q8WX93-9;Q8WX93-2;Q8WX93-4;Q8WX93-7	+	3.26315	1.1284	1.2945	1.4843	1.8488	1.2868	1.3017	1.3045	2.1196	1.3723	1.4629	1.6256	2.0371	11	12	15	10	14	7	12	13	17	14	14	8	11	12	15	10	14	7	12	13	17	14	14	8	25.5	25.5	25.5	1.2868	1.3017	1.4843	2.0371	0.988553
GCLM	Glutamate--cysteine ligase regulatory subunit	P48507	P48507	+	3.24923	0.81584	1.1674	1.4806	1.5904	0.91251	1	1.1684	1.8413	0.96236	1.2665	1.5327	1.7111	5	6	6	7	6	4	7	6	8	9	6	4	5	6	6	7	6	4	7	6	8	9	6	4	40.9	40.9	40.9	0.91251	1.1674	1.4806	1.7111	0.78166
G6PD	Glucose-6-phosphate 1-dehydrogenase	P11413-2;P11413-3;P11413	P11413-2;P11413-3;P11413		0.456055	1.5644	1.4968	1.4754	1.5331	1.8442	1.3042	1.3286	1.7299	1.7885	1.8072	1.6571	1.8215	7	16	14	16	16	12	17	14	17	16	17	14	7	16	14	16	16	12	17	14	17	16	17	14	48	48	48	1.7885	1.4968	1.4754	1.7299	1.19488
CHUK	Inhibitor of nuclear factor kappa-B kinase subunit alpha	O15111	O15111		0.864567	NaN	2.2955	NaN	2.9083	1.0012	NaN	1.4717	NaN	0.93544	1.5214	NaN	NaN	0	2	0	3	3	2	2	0	4	2	1	1	0	2	0	2	2	1	2	0	3	1	1	0	13.4	13.4	12.3	0.96832	1.90845	1.4717	2.9083	0.507386
MTHFD1L	Monofunctional C1-tetrahydrofolate synthase, mitochondrial	Q6UB35;Q6UB35-2	Q6UB35	+	2.85135	0.78209	1.2848	1.4716	1.6018	0.91069	1.2015	1.2174	1.9704	0.97682	1.5196	1.5149	1.6515	10	12	7	10	16	9	11	10	16	13	16	4	10	12	7	10	16	9	11	10	16	13	16	4	32.5	32.5	32.5	0.91069	1.2848	1.4716	1.6515	0.708818
PSME3	Proteasome activator complex subunit 3	P61289-2;P61289	P61289-2;P61289	+	2.80063	0.98893	1.4021	1.4706	1.745	1.0561	1.1698	1.2622	1.8756	1.2316	1.4995	1.6047	2.0231	3	6	5	6	6	5	8	7	9	7	6	3	3	6	5	6	6	5	8	7	9	7	6	3	42.7	42.7	42.7	1.0561	1.4021	1.4706	1.8756	0.753227
PDXK	Pyridoxal kinase	O00764;O00764-2;O00764-3	O00764;O00764-2;O00764-3		0.5036	0.87865	1.1838	NaN	1.2548	NaN	0.88905	NaN	1.6556	1.2852	1.2443	1.4705	NaN	3	2	1	2	2	2	1	2	5	4	4	1	3	2	1	2	2	2	1	2	5	4	4	1	37.2	37.2	37.2	1.08193	1.1838	1.4705	1.4552	0.913942
PLEKHA5	Pleckstrin homology domain-containing family A member 5	Q9HAU0-6;Q9HAU0-4;Q9HAU0-2;Q9HAU0;Q9HAU0-5;Q9HAU0-3	Q9HAU0-6;Q9HAU0-4;Q9HAU0-2;Q9HAU0;Q9HAU0-5;Q9HAU0-3	+	1.83344	0.85059	1.1584	NaN	1.7679	1.026	NaN	1.3904	1.4763	1.0824	1.2996	1.5483	NaN	2	5	1	8	7	1	3	2	8	3	7	1	2	5	1	8	7	1	3	2	8	3	7	1	11.4	11.4	11.4	1.026	1.229	1.46935	1.6221	0.834825
POLRMT	DNA-directed RNA polymerase, mitochondrial	O00411	O00411	+	2.21278	0.62059	1.1616	1.5202	1.8839	0.82258	1.1259	1.2835	1.3056	0.94565	1.3554	1.4665	2.0601	5	7	6	12	11	3	7	2	14	13	9	3	5	7	6	12	11	3	7	2	14	13	9	3	32.6	32.6	32.6	0.82258	1.1616	1.4665	1.8839	0.708144
RRP1B	Ribosomal RNA processing protein 1 homolog B	Q14684;Q14684-2	Q14684;Q14684-2	+	1.92038	0.83697	1.4982	1.4589	2.1205	1.0281	1.3801	1.3129	2.1162	1.1037	1.7551	2.111	NaN	4	7	5	4	10	7	6	3	13	11	9	0	4	7	5	4	10	7	6	3	13	11	9	0	27.6	27.6	27.6	1.0281	1.4982	1.4589	2.11835	0.686223
KIAA1598	Shootin-1	A0MZ66-3;A0MZ66;A0MZ66-6;A0MZ66-5;A0MZ66-4;A0MZ66-2;A0MZ66-7	A0MZ66-3;A0MZ66;A0MZ66-6;A0MZ66-5;A0MZ66-4;A0MZ66-2		0.673149	NaN	NaN	1.4632	1.4042	1.1072	1.0821	1.1947	2.1475	1.2188	1.3356	1.455	NaN	1	1	6	4	3	3	3	4	6	3	6	0	1	1	6	4	3	3	3	4	6	3	6	0	20.2	20.2	20.2	1.163	1.20885	1.455	1.77585	0.962071
PAPSS1	Bifunctional 3-phosphoadenosine 5-phosphosulfate synthase 1;Sulfate adenylyltransferase;Adenylyl-sulfate kinase	O43252;O95340-2;O95340	O43252		1.22799	NaN	1.5438	1.4496	1.6814	2.0237	NaN	1.3134	2.1082	2.5011	1.7836	1.6156	NaN	1	3	3	4	2	1	1	2	3	3	5	0	1	3	3	4	2	1	1	2	3	3	5	0	23.1	23.1	23.1	2.2624	1.6637	1.4496	1.8948	1.35986
C8orf33	UPF0488 protein C8orf33	Q9H7E9;Q9H7E9-2	Q9H7E9;Q9H7E9-2	+	1.62438	1.0573	1.3467	1.2377	1.6282	1.3986	1.198	NaN	1.802	1.2798	1.3559	1.6484	1.9517	2	3	4	2	3	2	1	3	4	2	4	3	2	3	4	2	3	2	1	3	4	2	4	3	43.7	43.7	43.7	1.2798	1.3467	1.44305	1.802	0.950323
IPO4	Importin-4	Q8TEX9-2;Q8TEX9	Q8TEX9-2;Q8TEX9	+	5.54832	0.76846	0.86741	1.4415	2.7422	0.88523	0.90782	1.2165	2.7466	0.93411	1.1465	1.5531	3.2219	13	21	19	20	25	15	20	12	25	23	23	8	13	21	19	20	25	15	20	12	25	23	23	8	44.2	44.2	44.2	0.88523	0.90782	1.4415	2.7466	0.975116
HEATR3	HEAT repeat-containing protein 3	Q7Z4Q2;Q7Z4Q2-2;Q7Z4Q2-3	Q7Z4Q2;Q7Z4Q2-2		0.715149	NaN	1.2289	NaN	1.5414	1.2802	NaN	NaN	1.9601	1.4559	1.3868	1.4397	NaN	1	3	1	3	2	0	1	2	3	5	3	0	1	3	1	3	2	0	1	2	3	5	3	0	10	10	10	1.36805	1.30785	1.4397	1.75075	1.04603
RBBP7	Histone-binding protein RBBP7	Q16576;Q16576-2	Q16576;Q16576-2		0.634408	1.2247	1.3324	1.4319	1.5908	1.5047	1.369	1.0764	1.6778	1.5838	1.54	1.5643	1.6918	2	2	5	4	5	3	3	3	3	7	4	4	0	1	3	3	2	1	2	1	1	4	2	1	24.9	24.9	20.9	1.5047	1.369	1.4319	1.6778	1.09912
ACO2	Aconitate hydratase, mitochondrial	Q99798	Q99798		1.10371	NaN	1.3882	NaN	1.3982	1.198	NaN	1.3499	NaN	1.0348	1.4738	1.5083	NaN	0	2	1	7	3	0	4	1	2	6	4	0	0	2	1	7	3	0	4	1	2	6	4	0	23.3	23.3	23.3	1.1164	1.431	1.4291	1.3982	0.780154
NME2	Nucleoside diphosphate kinase B	P22392-2;P22392;O60361	P22392-2;P22392	+	2.6492	1.0291	1.223	1.4266	1.7513	1.2648	1.1092	1.1583	1.8209	1.2643	1.4308	1.4808	1.9126	6	10	8	9	8	7	10	7	8	11	11	7	1	1	3	2	1	2	3	1	2	3	4	2	76	76	23.6	1.2643	1.223	1.4266	1.8209	1.03377
DNMBP	Dynamin-binding protein	Q6XZF7;Q6XZF7-2	Q6XZF7;Q6XZF7-2		0.65579	NaN	1.0814	1.2058	1.3692	1.1087	NaN	NaN	NaN	0.89687	1.0549	1.6448	NaN	1	2	2	3	2	0	0	1	2	3	2	0	1	2	2	3	2	0	0	1	2	3	2	0	7.3	7.3	7.3	1.00278	1.06815	1.4253	1.3692	0.938805
UBE2O	Ubiquitin-conjugating enzyme E2 O	Q9C0C9	Q9C0C9	+	1.49876	1.0077	1.3964	1.414	1.7469	1.2495	1.1527	1.2377	2.0994	1.35	1.5232	1.7165	1.6663	8	10	10	11	21	8	10	13	14	15	16	5	8	10	10	11	21	8	10	13	14	15	16	5	28.8	28.8	28.8	1.2495	1.3964	1.414	1.7469	0.894801
RNF14	E3 ubiquitin-protein ligase RNF14	Q9UBS8	Q9UBS8	+	1.92628	0.96698	1.1431	1.4026	1.7449	1.0469	1.0115	1.1175	2.0237	1.2182	1.4612	1.478	NaN	3	4	3	4	5	5	5	6	4	6	3	1	3	4	3	4	5	5	5	6	4	6	3	1	21.1	21.1	21.1	1.0469	1.1431	1.4026	1.8843	0.915843
ELAC2	Zinc phosphodiesterase ELAC protein 2	Q9BQ52;Q9BQ52-4;Q9BQ52-2;Q9BQ52-3	Q9BQ52;Q9BQ52-4;Q9BQ52-2	+	2.31463	1.0288	1.1324	1.4007	1.6102	1.0961	1.1561	1.0263	1.7574	0.98901	1.2822	1.4894	1.5528	3	4	7	13	10	3	6	4	13	12	10	5	3	4	7	13	10	3	6	4	13	12	10	5	40.7	40.7	40.7	1.0288	1.1561	1.4007	1.6102	0.889888
ILF3	Interleukin enhancer-binding factor 3	Q12906;Q12906-3;Q12906-6;Q12906-2;Q12906-4;Q12906-5	Q12906;Q12906-3;Q12906-6;Q12906-2;Q12906-4;Q12906-5	+	2.91096	1.0926	1.2659	1.3896	1.7289	1.1649	1.0922	1.2788	1.872	1.2498	1.472	1.4881	1.7632	8	13	13	17	15	13	13	10	16	11	13	7	7	11	12	15	13	11	11	10	15	9	11	6	29.6	29.6	26.8	1.1649	1.2659	1.3896	1.7632	0.920215
BAG5	BAG family molecular chaperone regulator 5	Q9UL15-2;Q9UL15	Q9UL15-2;Q9UL15		0.0257433	NaN	1.106	NaN	1.6395	NaN	NaN	1.2262	NaN	1.2268	1.7224	1.5456	NaN	0	2	0	2	1	0	3	0	3	2	2	0	0	2	0	2	1	0	3	0	3	2	2	0	13.9	13.9	13.9	1.2268	1.4142	1.3859	1.6395	0.867487
PSMD2	26S proteasome non-ATPase regulatory subunit 2	Q13200	Q13200	+	3.113	1.0941	1.1066	1.3846	1.5772	1.2219	1.0216	1.1503	1.8045	1.2084	1.2315	1.4027	1.7527	8	12	10	9	13	10	12	8	19	18	14	5	8	12	10	9	13	10	12	8	19	18	14	5	42.1	42.1	42.1	1.2084	1.1066	1.3846	1.7527	1.09199
PRMT3	Protein arginine N-methyltransferase 3	O60678;O60678-2	O60678;O60678-2	+	3.38367	0.75251	1.1893	1.3842	1.5904	0.91517	0.98661	1.1842	1.6702	0.98768	1.2059	1.3908	1.9302	3	2	3	6	5	3	6	3	10	10	6	2	3	2	3	6	5	3	6	3	10	10	6	2	32.4	32.4	32.4	0.91517	1.1893	1.3842	1.6702	0.769503
PFKM	6-phosphofructokinase, muscle type	P08237;P08237-2	P08237;P08237-2		0.242175	1.0837	1.471	NaN	1.4293	NaN	1.0461	1.1845	1.7791	1.4744	1.3863	1.5746	NaN	2	2	1	2	1	2	2	2	3	3	5	1	2	2	1	2	1	2	2	2	3	3	5	1	14.7	11.7	11.7	1.27905	1.3863	1.37955	1.6042	0.922636
MAP7D1	MAP7 domain-containing protein 1	Q3KQU3;Q3KQU3-4;Q3KQU3-2;Q3KQU3-3	Q3KQU3;Q3KQU3-4;Q3KQU3-2		0.462754	NaN	0.99596	1.4597	NaN	1.0034	NaN	NaN	1.7808	0.99742	1.5003	1.2928	NaN	1	2	2	1	4	1	1	2	2	3	2	0	1	2	2	1	4	1	1	2	2	3	2	0	10.6	10.6	10.6	1.00041	1.24813	1.37625	1.7808	0.801527
PLA2G4A	Cytosolic phospholipase A2;Phospholipase A2;Lysophospholipase	P47712	P47712	+	2.68419	1.2361	1.2958	1.3694	1.7797	1.4107	1.1658	1.2085	2.0328	1.5201	1.4529	1.5085	2.0244	12	21	19	23	20	16	20	18	19	20	21	14	12	21	19	23	20	16	20	18	19	20	21	14	50.9	50.9	50.9	1.4107	1.2958	1.3694	2.0244	1.08867
TBCD	Tubulin-specific chaperone D	Q9BTW9-4;Q9BTW9;Q9BTW9-5;Q9BTW9-2;Q9BTW9-3	Q9BTW9-4;Q9BTW9;Q9BTW9-5	+	4.0957	1.2234	1.2069	1.3846	2.0103	1.1522	1.2455	1.2632	1.8182	1.4094	1.325	1.3674	1.8714	2	6	5	7	4	3	4	5	10	8	11	2	2	6	5	7	4	3	4	5	10	8	11	2	23.5	23.5	23.5	1.2234	1.2455	1.3674	1.8714	0.982256
WDR1	WD repeat-containing protein 1	O75083;O75083-3	O75083;O75083-3	+	1.35407	1.3381	1.1298	1.3648	1.5218	1.5494	1.272	1.2033	1.7347	1.5497	1.4485	1.5062	1.7581	8	7	9	10	13	9	12	8	11	10	9	7	8	7	9	10	13	9	12	8	11	10	9	7	38.8	38.8	38.8	1.5494	1.272	1.3648	1.7347	1.21808
WDR6	WD repeat-containing protein 6	Q9NNW5	Q9NNW5		1.19516	NaN	NaN	1.2617	1.9696	0.94947	NaN	NaN	NaN	0.99086	0.82012	1.4668	NaN	0	1	3	1	3	1	1	1	2	2	3	1	0	1	3	1	3	1	1	1	2	2	3	1	9.4	9.4	9.4	0.970165	0.82012	1.36425	1.9696	1.18295
SMC2	Structural maintenance of chromosomes protein 2	O95347;O95347-2	O95347;O95347-2		0.205866	NaN	1.1847	1.3255	1.8701	1.2734	NaN	1.3598	NaN	1.2525	1.596	1.6264	NaN	0	2	2	5	3	1	3	1	4	4	5	0	0	2	2	5	3	1	3	1	4	4	5	0	7.9	7.9	7.9	1.26295	1.39035	1.3598	1.8701	0.908368
IMPDH2	Inosine-5-monophosphate dehydrogenase 2	P12268	P12268	+	3.81236	0.85224	1.2167	1.3587	1.7474	0.97878	1.0972	1.182	1.9009	1.0555	1.3524	1.5001	1.9675	20	21	20	23	23	19	22	20	23	23	23	16	19	20	18	22	22	18	21	19	22	22	22	15	64.8	64.8	61.9	0.97878	1.2167	1.3587	1.9009	0.804455
RUFY1	RUN and FYVE domain-containing protein 1	Q96T51;Q96T51-2;Q96T51-3;Q8WXA3;Q8WXA3-3;Q7L099-3;Q8WXA3-2;Q7L099-4;Q7L099-2;Q7L099;Q8WXA3-4	Q96T51;Q96T51-2;Q96T51-3	+	3.77037	1.0224	1.3533	1.3327	1.8172	1.0914	NaN	NaN	1.9138	1.1069	NaN	1.3825	NaN	2	2	2	3	2	1	0	3	2	1	2	0	2	2	2	3	2	1	0	3	2	1	2	0	8.6	8.6	8.6	1.0914	1.3533	1.3576	1.8655	0.806473
PLIN3	Perilipin-3	O60664;O60664-3;O60664-2	O60664;O60664-3;O60664-2	+	3.12224	1.1302	1.1484	1.3447	1.8961	1.2915	1.0481	1.1716	2.2485	1.3863	1.336	1.5686	2.006	5	9	9	10	11	7	8	7	11	7	8	4	5	9	9	10	11	7	8	7	11	7	8	4	54.6	54.6	54.6	1.2915	1.1484	1.3447	2.006	1.12461
NPEPPS	Puromycin-sensitive aminopeptidase	P55786;A6NEC2;A6NEC2-2;A6NEC2-3	P55786		1.00003	1.4284	1.2917	1.5376	1.5029	1.5617	1.1744	1.0874	1.6729	1.4696	1.4779	1.3413	1.7006	5	11	6	13	10	8	13	8	11	14	15	4	5	11	6	13	10	8	13	8	11	14	15	4	32.9	32.9	32.9	1.4696	1.2917	1.3413	1.6729	1.13773
PSMB2	Proteasome subunit beta type-2	P49721	P49721		0.565261	0.95897	0.99705	1.1494	1.4212	1.2236	NaN	NaN	NaN	1.213	1.3858	1.5207	1.6813	2	3	2	3	2	1	1	1	4	3	3	2	2	3	2	3	2	1	1	1	4	3	3	2	36.3	36.3	36.3	1.213	1.19142	1.33505	1.55125	1.01811
NRD1	Nardilysin	O43847-2;O43847	O43847-2;O43847	+	1.73382	1.0454	1.503	1.3346	1.6376	1.2202	1.1798	1.1561	1.7563	1.4144	1.448	1.4147	1.7015	4	8	10	14	15	6	9	9	13	16	13	3	4	8	10	14	15	6	9	9	13	16	13	3	22.7	22.7	22.7	1.2202	1.448	1.3346	1.7015	0.84268
CAD	CAD protein;Glutamine-dependent carbamoyl-phosphate synthase;Aspartate carbamoyltransferase;Dihydroorotase	P27708	P27708	+	2.2275	0.86313	1.1995	1.3274	1.4904	1.0762	1.0993	1.077	1.6591	1.1913	1.3398	1.3312	1.6575	13	24	15	24	20	15	17	14	23	25	22	3	13	24	15	24	20	15	17	14	23	25	22	3	26.2	25.2	25.2	1.0762	1.1995	1.3274	1.6575	0.897207
NONO	Non-POU domain-containing octamer-binding protein	Q15233	Q15233		0.0160023	NaN	1.202	1.4043	1.3677	1.1788	1.2031	1.1609	1.3215	1.5575	1.5208	1.3272	NaN	0	6	4	5	4	3	6	2	6	5	9	1	0	5	3	4	4	2	5	1	5	4	8	1	24.8	24.8	23.1	1.36815	1.2031	1.3272	1.3446	1.13719
IAH1	Isoamyl acetate-hydrolyzing esterase 1 homolog	Q2TAA2	Q2TAA2		0.021774	NaN	1.2399	NaN	1.4397	NaN	NaN	1.0954	NaN	1.2802	1.3728	1.5501	NaN	0	3	1	2	0	1	2	1	2	2	3	0	0	3	1	2	0	1	2	1	2	2	3	0	21	21	21	1.2802	1.30635	1.32275	1.4397	0.979982
MCM3	DNA replication licensing factor MCM3	P25205	P25205		0.949564	NaN	NaN	NaN	1.5796	0.79262	NaN	1.0643	1.628	1.0037	1.5195	1.5732	NaN	1	1	1	3	3	1	4	3	6	2	4	0	1	1	1	3	3	1	4	3	6	2	4	0	11.5	11.5	11.5	0.89816	1.5195	1.31875	1.6038	0.591089
PGD	6-phosphogluconate dehydrogenase, decarboxylating	P52209	P52209		1.20832	1.1828	1.2824	1.3184	1.4934	1.3871	1.1421	1.1608	1.7817	1.5305	1.413	1.4639	1.6783	4	4	5	7	8	3	6	5	14	12	10	4	4	4	5	7	8	3	6	5	14	12	10	4	45.1	45.1	45.1	1.3871	1.2824	1.3184	1.6783	1.08164
KHSRP	Far upstream element-binding protein 2	Q92945	Q92945	+	1.70247	1.1872	1.2581	1.3162	1.532	1.2717	1.1237	1.1737	1.7269	1.388	1.4648	1.4556	1.7976	10	16	15	17	17	15	17	13	18	18	16	13	9	15	14	16	15	13	16	11	16	16	15	12	35.9	35.9	33.8	1.2717	1.2581	1.3162	1.7269	1.01081
SH3PXD2B	SH3 and PX domain-containing protein 2B	A1X283	A1X283		0.0642939	NaN	1.1775	1.3916	2.9315	NaN	NaN	1.3152	NaN	1.0492	1.3568	0.99905	NaN	1	4	2	3	1	1	3	1	4	4	4	1	1	4	2	3	1	1	3	1	4	4	4	1	12.6	12.6	12.6	1.0492	1.26715	1.3152	2.9315	0.828
PPP6R3	Serine/threonine-protein phosphatase 6 regulatory subunit 3	Q5H9R7-5;Q5H9R7;Q5H9R7-2;Q5H9R7-6;Q5H9R7-4;Q5H9R7-3	Q5H9R7-5;Q5H9R7;Q5H9R7-2;Q5H9R7-6;Q5H9R7-4;Q5H9R7-3		1.21729	1.2325	1.0829	1.35	1.4423	1.0967	1.0508	1.0482	1.6493	1.2443	1.3091	1.3062	NaN	4	8	6	14	8	4	9	3	7	13	11	1	4	8	6	14	8	4	9	3	7	13	11	1	35.4	35.4	35.4	1.2325	1.0829	1.3062	1.5458	1.13815
EDC3	Enhancer of mRNA-decapping protein 3	Q96F86	Q96F86	+	1.39729	0.69702	1.093	1.3915	1.5925	0.88145	0.92501	1.0571	NaN	0.82689	1.3431	1.3048	NaN	2	4	3	5	4	2	4	1	5	3	6	0	2	4	3	5	4	2	4	1	5	3	6	0	26.8	26.8	26.8	0.82689	1.093	1.3048	1.5925	0.756532
TKT	Transketolase	P29401	P29401	+	1.7516	1.2782	1.1853	1.3046	1.6304	1.5954	1.1306	1.1881	1.8496	1.6263	1.4674	1.4438	1.8034	14	22	20	20	20	19	19	18	21	24	19	14	14	22	20	20	20	19	19	18	21	24	19	14	61.3	61.3	61.3	1.5954	1.1853	1.3046	1.8034	1.34599
VCP	Transitional endoplasmic reticulum ATPase	P55072	P55072		0.744112	1.1902	1.1725	1.3004	1.4944	1.3884	1.1755	1.139	1.5705	1.5048	1.5068	1.4689	1.6248	5	9	8	13	10	8	12	7	18	19	17	5	5	9	8	13	10	8	12	7	18	19	17	5	49.6	49.6	49.6	1.3884	1.1755	1.3004	1.5705	1.18111
DPYSL2	Dihydropyrimidinase-related protein 2	Q16555	Q16555		0.500132	NaN	1.402	1.5121	1.4062	1.7617	1.2493	NaN	1.7084	1.5293	1.4326	1.0735	NaN	1	3	2	4	2	2	2	2	3	4	4	0	1	3	2	4	2	2	2	2	3	3	4	0	22.2	18.2	15.9	1.6455	1.402	1.2928	1.5573	1.17368
FXR2	Fragile X mental retardation syndrome-related protein 2	P51116	P51116		0.898491	0.96705	NaN	1.2887	1.7792	1.3159	1.1097	0.82984	1.6613	1.4114	1.2984	1.3781	NaN	3	1	3	3	2	3	4	2	2	5	4	0	3	1	3	2	2	3	4	2	2	5	4	0	17.2	14.9	12	1.3159	1.20405	1.2887	1.72025	1.09289
PPP2R2A	Serine/threonine-protein phosphatase 2A 55 kDa regulatory subunit B alpha isoform	P63151-2;P63151;Q00005-5;Q00005-4;Q66LE6;Q00005-2;Q00005;Q9Y2T4;Q9Y2T4-2;Q9Y2T4-4;Q9Y2T4-3	P63151-2;P63151		0.524824	NaN	1.0546	1.3007	0.97547	NaN	0.79883	1.0905	0.91012	1.2396	1.317	1.286	NaN	1	5	3	5	1	2	4	5	4	4	6	1	1	3	2	4	1	1	2	4	3	3	5	0	27.4	27.4	17.7	1.2396	1.0546	1.286	0.942795	1.17542
DBN1	Drebrin	Q16643;Q16643-2	Q16643;Q16643-2		0.443466	NaN	NaN	1.2946	0.96533	NaN	NaN	0.86159	0.92968	NaN	0.86851	1.2809	NaN	1	1	2	3	1	1	2	2	1	2	2	0	1	1	2	3	1	1	2	2	1	2	2	0	8.5	8.5	8.5	NaN	0.86851	1.2809	0.947505	#VALUE!
PSMD13	26S proteasome non-ATPase regulatory subunit 13	Q9UNM6;Q9UNM6-2	Q9UNM6;Q9UNM6-2	+	1.67177	NaN	1.2248	NaN	1.6031	1.2139	1.1926	1.1671	1.5178	NaN	1.1452	1.3799	NaN	1	4	1	4	3	2	2	3	1	3	3	1	1	4	1	4	3	2	2	3	1	3	3	1	22.6	22.6	22.6	1.2139	1.1926	1.2735	1.56045	1.01786
INPPL1	Phosphatidylinositol 3,4,5-trisphosphate 5-phosphatase 2	O15357;O15357-2;Q92835;Q92835-2;Q92835-3	O15357;O15357-2	+	1.5027	NaN	1.161	NaN	1.4312	0.97215	0.99246	NaN	2.0009	1.0915	1.3122	1.2724	1.6515	2	3	2	9	6	2	3	4	10	11	7	3	2	3	2	9	6	2	3	4	10	11	7	3	21.3	21.3	21.3	1.03183	1.161	1.2724	1.6515	0.888738
HNRNPH1	Heterogeneous nuclear ribonucleoprotein H;Heterogeneous nuclear ribonucleoprotein H, N-terminally processed	P31943	P31943	+	2.28198	1.0146	1.149	1.2705	1.6344	0.99026	1.0991	1.0463	1.6626	1.201	1.4997	1.3469	1.7794	6	9	13	11	11	10	11	7	7	7	8	9	1	4	5	4	4	4	4	1	3	4	5	4	40.1	34.1	16.7	1.0146	1.149	1.2705	1.6626	0.883029
DHX36	Probable ATP-dependent RNA helicase DHX36	Q9H2U1;Q9H2U1-2;Q9H2U1-3;Q6P158;Q6P158-2	Q9H2U1;Q9H2U1-2;Q9H2U1-3		1.28456	NaN	1.3617	NaN	1.5335	1.0866	NaN	1.2697	1.9494	1.1133	1.2524	1.2685	NaN	0	3	0	4	4	0	2	2	6	5	4	0	0	3	0	4	4	0	2	2	6	5	4	0	13	13	13	1.09995	1.30705	1.2691	1.74145	0.841552
RRBP1	Ribosome-binding protein 1	Q9P2E9;Q9P2E9-2;Q9P2E9-3;Q8N4C6-5;Q8N4C6;Q8N4C6-2;Q8N4C6-9;Q8N4C6-4;Q8N4C6-11;Q8N4C6-6	Q9P2E9;Q9P2E9-2;Q9P2E9-3	+	2.71046	NaN	1.4744	1.3514	1.7038	2.0004	NaN	1.1357	NaN	1.9844	1.3497	1.2689	NaN	1	1	2	2	4	1	2	1	3	6	6	1	1	1	2	2	3	1	2	1	3	5	6	1	8.7	8.7	8	1.9924	1.41205	1.2689	1.7038	1.411
PPAT	Amidophosphoribosyltransferase	Q06203	Q06203	+	1.44132	1.2268	1.1114	1.3715	1.3745	1.1456	1.1106	1.0665	1.5146	1.1312	1.147	1.2642	NaN	3	6	3	7	3	3	5	4	6	7	7	1	3	6	3	7	3	3	5	4	6	7	7	1	23.2	23.2	23.2	1.1456	1.1114	1.2642	1.44455	1.03077
CSTB	Cystatin-B	P04080	P04080		0.440046	0.96769	NaN	1.3864	1.4477	1.107	1.3279	1.1354	NaN	1.202	1.1778	NaN	NaN	2	1	2	2	3	2	2	0	4	5	1	0	2	1	2	2	3	2	2	0	4	5	1	0	61.2	61.2	61.2	1.107	1.25285	1.2609	1.4477	0.883585
CTPS	CTP synthase 1	P17812;Q9NRF8	P17812	+	2.20071	0.85957	1.0713	1.2524	1.426	0.97026	0.99379	1.0434	1.492	1.0944	1.2731	1.3431	1.5028	11	14	14	21	19	12	19	13	21	21	17	10	11	14	14	21	19	12	19	13	21	21	17	10	56.7	56.7	56.7	0.97026	1.0713	1.2524	1.492	0.905685
MAP1B	Microtubule-associated protein 1B;MAP1 light chain LC1	P46821;P78559-2;P78559	P46821		0.124412	0.99314	1.213	1.2493	1.2272	1.2218	1.2553	1.1047	1.2524	1.3613	1.4232	1.3248	1.3172	5	9	9	18	11	9	8	7	19	15	14	2	5	9	9	18	11	9	8	7	19	15	14	2	18.8	18.8	18.8	1.2218	1.2553	1.2493	1.2524	0.973313
SEC24C	Protein transport protein Sec24C	P53992	P53992	+	3.2286	1.0606	1.0284	1.2477	1.576	1.1035	0.95358	1.0129	1.6215	1.2386	1.1552	1.2852	1.6801	4	4	3	6	8	5	8	2	6	6	10	2	4	4	3	6	8	5	8	2	6	6	10	2	19.6	19.6	19.6	1.1035	1.0284	1.2477	1.6215	1.07303
FUBP3	Far upstream element-binding protein 3	Q96I24;Q96I24-2	Q96I24	+	4.1727	1.1066	1.2274	1.2474	1.9603	0.9914	1.2449	1.0358	2.2805	1.0742	1.2722	1.2618	1.8556	2	5	5	6	7	4	5	3	8	7	7	2	2	4	5	6	7	4	4	3	7	7	6	2	27.8	27.8	26.2	1.0742	1.2449	1.2474	1.9603	0.862881
PPM1G	Protein phosphatase 1G	O15355	O15355	+	3.52203	0.97815	1.0578	1.2372	1.5641	1.0729	0.98555	1.0891	1.6963	1.157	1.2308	1.2763	1.6803	8	8	9	12	10	7	10	6	11	10	8	7	8	8	9	12	10	7	10	6	11	10	8	7	38.1	38.1	38.1	1.0729	1.0578	1.2372	1.6803	1.01427
GLOD4	Glyoxalase domain-containing protein 4	Q9HC38;Q9HC38-2;Q9HC38-3	Q9HC38;Q9HC38-2	+	1.72226	1.0128	1.1048	1.2341	1.3524	1.1582	1.0286	1.0456	1.4568	1.2641	1.2105	1.2607	1.5184	5	8	7	8	6	6	9	6	9	8	8	5	5	8	7	8	6	6	9	6	9	8	8	5	43.1	43.1	43.1	1.1582	1.1048	1.2341	1.4568	1.04833
FBXO22	F-box only protein 22	Q8NEZ5;Q8NEZ5-3;Q8NEZ5-2;Q7Z4K8;Q7Z4K8-2;Q7Z4K8-3;Q7Z4K8-4	Q8NEZ5;Q8NEZ5-3	+	1.76664	1.0743	1.0029	1.2332	1.3246	1.0146	0.93705	1.0225	1.5609	1.1411	1.2549	1.315	1.6057	4	4	6	7	6	4	5	4	3	7	6	4	4	4	6	7	6	4	5	4	3	7	6	4	26.6	26.6	26.6	1.0743	1.0029	1.2332	1.5609	1.07119
MTAP	S-methyl-5-thioadenosine phosphorylase	Q13126;Q13126-2;Q13126-3;Q13126-4;Q13126-5;Q13126-6;Q13126-7	Q13126;Q13126-2;Q13126-3;Q13126-4;Q13126-5;Q13126-6;Q13126-7	+	1.51714	NaN	0.91682	1.2287	1.0768	0.96928	0.7764	1.0495	1.1451	1.0308	0.96282	1.2342	NaN	1	3	2	7	5	4	3	2	5	3	5	1	1	3	2	7	5	4	3	2	5	3	5	1	50.9	50.9	50.9	1.00004	0.91682	1.2287	1.11095	1.09077
TMOD3	Tropomodulin-3	Q9NYL9;P28289	Q9NYL9	+	4.36677	0.67269	0.99116	1.2265	1.7655	0.77872	0.94628	1.0251	1.9155	0.89011	1.1302	1.3491	2.1044	4	7	4	7	8	5	8	4	6	4	6	2	4	7	4	7	8	5	8	4	6	4	6	2	64.2	64.2	64.2	0.77872	0.99116	1.2265	1.9155	0.785665
PCYT1A	Choline-phosphate cytidylyltransferase A	P49585;Q9Y5K3;Q9Y5K3-3;Q9Y5K3-4;Q9Y5K3-2	P49585	+	1.33155	1.182	0.91181	1.2234	1.3801	1.2364	1.0111	0.91161	1.5376	1.1656	1.259	1.3364	1.493	3	7	5	7	7	4	8	5	9	8	7	4	3	7	5	7	7	4	8	5	9	8	7	4	42.8	42.8	42.8	1.182	1.0111	1.2234	1.493	1.16902
CBS	Cystathionine beta-synthase	P35520-2;P35520	P35520-2;P35520	+	2.37048	0.77164	0.83549	NaN	1.5932	0.90594	0.92339	1.1526	2.1751	0.95241	1.0161	1.2909	NaN	2	3	1	4	6	3	3	3	8	8	5	0	2	3	1	4	6	3	3	3	8	8	5	0	42.1	42.1	42.1	0.90594	0.92339	1.22175	1.88415	0.981102
HSPA4L	Heat shock 70 kDa protein 4L	O95757	O95757		1.10439	NaN	1.0918	1.2119	1.3906	1.2341	0.94868	1.046	1.6784	1.1885	1.2096	1.3829	NaN	1	4	4	10	7	4	3	5	6	7	9	1	1	4	4	10	7	4	3	5	6	7	9	1	35.9	29.6	29.6	1.2113	1.0918	1.2119	1.5345	1.10945
USP5	Ubiquitin carboxyl-terminal hydrolase 5	P45974-2;P45974;REV__Q9UPY3;REV__Q9UPY3-2;Q92995;Q92995-2	P45974-2;P45974	+	1.60299	1.041	1.0846	1.2109	1.3083	1.2202	0.96386	0.99356	1.5813	1.259	1.2075	1.2509	1.5846	12	15	14	18	16	15	15	15	17	19	19	9	12	15	14	18	16	15	15	15	17	19	19	9	55.3	55.3	55.3	1.2202	1.0846	1.2109	1.5813	1.12502
RELA	Transcription factor p65	Q04206;Q04206-4;Q04206-3;Q04206-2	Q04206;Q04206-4;Q04206-3;Q04206-2	+	2.24617	0.88456	1.1596	1.2103	1.5264	1.0648	0.93675	1.0832	1.636	1.105	1.331	1.4124	1.6974	2	3	2	4	6	2	2	2	7	4	6	2	2	3	2	4	6	2	2	2	7	4	6	2	27	27	27	1.0648	1.1596	1.2103	1.636	0.918248
C20orf43	UPF0549 protein C20orf43	Q9BY42	Q9BY42	+	3.80003	0.83251	1.0492	1.2514	1.754	0.93031	1.051	0.86892	1.9503	1.0447	1.2418	1.2065	1.9096	2	3	3	3	3	2	4	2	3	3	2	3	2	3	3	3	3	2	4	2	3	3	2	3	20.9	20.9	20.9	0.93031	1.051	1.2065	1.9096	0.885167
TRIP13	Pachytene checkpoint protein 2 homolog	Q15645;Q15645-2	Q15645	+	2.73753	0.95317	1.1587	1.2053	1.4616	1.0966	0.99432	1.133	1.6172	1.188	1.2222	1.3133	1.6448	14	17	15	19	20	16	17	17	18	18	21	16	14	17	15	19	20	16	17	17	18	18	21	16	61.6	61.6	61.6	1.0966	1.1587	1.2053	1.6172	0.946406
NCAPD2	Condensin complex subunit 1	Q15021	Q15021		0.434585	NaN	0.88612	NaN	1.0206	0.92261	0.83918	1.0954	2.8656	0.91769	1.1821	1.3149	NaN	1	7	0	2	10	4	6	3	12	8	7	0	1	7	0	2	10	4	6	3	12	8	7	0	26.6	26.6	26.6	0.92015	0.88612	1.20515	1.9431	1.0384
CRLF1	Cytokine receptor-like factor 1	O75462	O75462		0.135237	NaN	1.0912	1.2049	1.1806	2.0432	NaN	0.94879	1.0147	NaN	1.4808	1.4413	NaN	1	3	2	3	2	0	3	2	1	2	3	0	1	3	2	3	2	0	3	2	1	2	3	0	13.5	13.5	13.5	2.0432	1.286	1.2049	1.09765	1.5888
S100A16	Protein S100-A16	Q96FQ6	Q96FQ6	+	1.66907	1.0223	1.2379	1.1961	1.479	1.2349	1.0242	1.0351	2.0725	1.2717	1.3309	1.2954	1.6321	2	4	3	4	4	3	5	3	5	5	5	2	2	4	3	4	4	3	5	3	5	5	5	2	53.4	53.4	53.4	1.2349	1.2379	1.1961	1.6321	0.997577
COPA	Coatomer subunit alpha;Xenin;Proxenin	P53621-2;P53621	P53621-2;P53621	+	2.15654	1.2073	0.98402	1.1954	1.7222	1.3048	1.041	1.1201	1.5359	1.382	1.2872	1.2107	NaN	2	3	2	5	6	2	3	2	8	12	7	1	2	3	2	5	6	2	3	2	8	12	7	1	20.7	20.7	20.7	1.3048	1.041	1.1954	1.62905	1.25341
TNKS1BP1	182 kDa tankyrase-1-binding protein	Q9C0C2;Q9C0C2-2	Q9C0C2;Q9C0C2-2		0.537686	1.3414	1.0869	1.1089	1.3369	1.1915	1.1448	NaN	NaN	1.2372	1.1891	1.2804	NaN	2	3	3	7	5	2	1	0	10	10	7	0	2	3	3	7	5	2	1	0	10	10	7	0	16.9	16.9	16.9	1.2372	1.1448	1.19465	1.3369	1.08071
PRRC2C	Protein PRRC2C	Q9Y520-7;Q9Y520;Q9Y520-5;Q9Y520-4;Q9Y520-6;Q9Y520-3	Q9Y520-7;Q9Y520;Q9Y520-5;Q9Y520-4;Q9Y520-6;Q9Y520-3	+	2.99758	0.85687	1.1458	1.192	1.5022	1.0366	0.93547	1.0672	1.601	1.0353	1.2494	1.2438	1.5642	4	6	2	6	10	7	4	5	16	11	12	3	0	0	0	0	0	1	0	0	0	0	0	0	12.6	12.6	0.8	1.0353	1.1458	1.192	1.5642	0.903561
GBE1	1,4-alpha-glucan-branching enzyme	Q04446	Q04446		0.553277	1.1908	1.2041	1.1839	1.1887	1.3552	1.0653	1.0525	1.3387	1.4301	1.2963	1.2416	1.253	6	7	7	10	7	4	11	5	11	10	10	3	6	7	7	10	7	4	11	5	11	10	10	3	36.6	36.6	36.6	1.3552	1.2041	1.1839	1.253	1.12549
FXR1	Fragile X mental retardation syndrome-related protein 1	P51114;P51114-2;P51114-3	P51114;P51114-2;P51114-3	+	3.32429	0.94505	1.0618	1.1832	1.6981	1.1364	0.91984	0.94768	1.605	1.1506	1.1478	1.2103	1.8538	6	12	8	7	10	7	11	7	9	9	13	5	4	10	6	5	8	5	9	5	7	7	11	3	38.5	38.5	35.9	1.1364	1.0618	1.1832	1.6981	1.07026
COPB1	Coatomer subunit beta	P53618	P53618	+	1.30686	0.9866	1.1102	1.1819	1.4269	1.0485	1.0712	1.0716	1.6102	1.2662	1.4314	1.3527	1.4775	4	6	8	13	13	5	6	3	9	12	11	4	4	6	8	13	13	5	6	3	9	12	11	4	34	34	34	1.0485	1.1102	1.1819	1.4775	0.944424
PLCG1	1-phosphatidylinositol 4,5-bisphosphate phosphodiesterase gamma-1	P19174-2;P19174	P19174-2;P19174		0.289133	NaN	1.4939	1.1738	1.231	0.99121	NaN	NaN	NaN	1.1102	1.071	1.1871	NaN	0	2	2	3	3	1	1	0	6	4	5	0	0	2	2	3	3	1	1	0	6	4	5	0	10	10	10	1.0507	1.28245	1.18045	1.231	0.819295
NCAPH	Condensin complex subunit 2	Q15003	Q15003		0.385575	NaN	1.0194	1.1781	1.665	1.0237	NaN	1.1023	1.6105	1.3881	1.7796	1.3498	NaN	1	5	4	4	8	1	3	3	4	2	3	1	1	5	4	4	8	1	3	3	4	2	3	1	20.2	20.2	20.2	1.2059	1.3995	1.1781	1.63775	0.861665
ELP2	Elongator complex protein 2	Q6IA86;Q6IA86-5;Q6IA86-3;Q6IA86-2;Q6IA86-4	Q6IA86;Q6IA86-5;Q6IA86-3;Q6IA86-2;Q6IA86-4		1.23895	NaN	1.0023	1.0254	1.3402	1.0967	0.93058	NaN	1.3369	1.1624	1.0163	1.3269	NaN	1	3	4	5	2	3	0	2	4	3	3	0	1	3	4	5	2	3	0	2	4	3	3	0	17.4	17.4	17.4	1.12955	1.0023	1.17615	1.33855	1.12696
LDHA	L-lactate dehydrogenase A chain	P00338-3;P00338;P00338-4;P00338-2;P00338-5;Q9BYZ2;Q6ZMR3	P00338-3;P00338;P00338-4;P00338-2;P00338-5		0.799331	1.1747	1.106	1.1736	1.2845	1.3499	1.0718	1.0878	1.4975	1.4217	1.3483	1.3155	1.4454	16	20	17	19	20	17	20	14	21	22	21	15	14	18	15	17	18	15	18	12	19	20	19	13	70.9	70.9	65.9	1.3499	1.106	1.1736	1.4454	1.22052
NUP155	Nuclear pore complex protein Nup155	O75694;O75694-2	O75694;O75694-2	+	3.04794	0.78081	0.93271	1.1714	1.382	0.86858	0.83754	0.94654	1.5396	1	1.067	1.2093	1.5731	7	13	11	14	12	10	11	8	16	17	19	4	7	13	11	14	12	10	11	8	16	17	19	4	31.5	31.5	31.5	0.86858	0.93271	1.1714	1.5396	0.931243
AMMECR1	AMME syndrome candidate gene 1 protein	Q9Y4X0;Q9Y4X0-3;Q9Y4X0-4;Q6DCA0;Q9Y4X0-2	Q9Y4X0;Q9Y4X0-3;Q9Y4X0-4	+	1.54177	0.87805	1.0366	1.4148	1.7887	0.85065	0.97441	0.92545	2.7077	1.2522	1.5874	NaN	1.8755	2	3	3	2	4	3	3	3	2	2	1	2	2	3	3	2	4	3	3	3	2	2	1	2	20.1	20.1	20.1	0.87805	1.0366	1.17013	1.8755	0.847048
GLO1	Lactoylglutathione lyase	Q04760;Q04760-2	Q04760;Q04760-2		0.297511	1.0873	1.0845	1.1842	1.1639	1.3328	0.75871	1.0116	NaN	1.3292	1.2817	1.1696	1.2539	2	4	4	6	4	3	4	1	4	4	5	3	2	4	4	6	4	3	4	1	4	4	5	3	42.4	42.4	42.4	1.3292	1.0845	1.1696	1.2089	1.22563
AARSD1	Alanyl-tRNA editing protein Aarsd1	Q9BTE6-3;Q9BTE6-2;Q9BTE6	Q9BTE6-3;Q9BTE6-2;Q9BTE6	+	1.82901	0.86933	0.97124	1.166	1.2376	1.0956	0.91015	0.93242	1.3748	0.8993	1.0695	1.2134	1.588	4	7	3	7	5	4	5	5	3	3	6	2	4	7	3	7	5	4	5	5	3	3	6	2	28.5	28.5	28.5	0.8993	0.97124	1.166	1.3748	0.92593
CALD1	Caldesmon	Q05682-4;Q05682-5;Q05682;Q05682-2;Q05682-6;Q05682-3	Q05682-4;Q05682-5;Q05682;Q05682-2;Q05682-6;Q05682-3	+	3.2167	1.0523	0.92115	1.1658	1.4268	1.0146	0.92806	0.92065	1.6411	1.1038	1.0075	1.2468	1.5817	5	6	5	5	6	5	6	5	8	5	8	4	5	6	5	5	6	5	6	5	8	5	8	4	27.7	27.7	27.7	1.0523	0.92806	1.1658	1.5817	1.13387
HSPA8	Heat shock cognate 71 kDa protein	P11142;P11142-2;P54652	P11142;P11142-2	+	1.97777	0.94386	1.0397	1.1601	1.2553	1.0733	0.95636	1.0159	1.3899	1.1016	1.1345	1.1922	1.3233	22	20	21	22	21	21	22	22	24	21	22	18	19	18	18	19	18	18	19	19	21	18	19	15	52.6	52.6	49.2	1.0733	1.0397	1.1601	1.3233	1.03232
CBR1	Carbonyl reductase [NADPH] 1	P16152	P16152		0.34176	1.2452	1.0834	1.2663	1.191	1.2064	NaN	1.0501	1.2755	1.3035	NaN	1.1557	1.0756	2	2	2	2	3	1	2	3	2	2	3	2	1	1	1	1	2	1	1	1	1	2	3	1	37.5	37.5	27.1	1.2452	1.0834	1.1557	1.191	1.14934
INF2	Inverted formin-2	Q27J81;Q27J81-2;Q27J81-3	Q27J81;Q27J81-2		0.519013	NaN	1.1444	1.041	1.378	1.3582	NaN	1.1525	1.5066	1.4624	1.3415	1.4094	NaN	0	4	2	5	2	1	3	2	5	6	4	0	0	4	2	5	2	1	3	2	5	6	4	0	12.1	12.1	12.1	1.4103	1.24295	1.1525	1.4423	1.13464
PPOX	Protoporphyrinogen oxidase	P50336	P50336		0.440204	NaN	1.1275	NaN	1.2305	1.0476	NaN	1.0555	NaN	1.0208	1.409	1.2387	NaN	0	3	0	2	2	1	2	1	4	3	3	0	0	3	0	2	2	1	2	1	4	3	3	0	16.8	16.8	16.8	1.0342	1.26825	1.1471	1.2305	0.815454
RECQL	ATP-dependent DNA helicase Q1	P46063	P46063		0.699369	NaN	1.0794	1.1425	1.172	1.2063	0.95851	0.94751	1.2913	1.4023	1.2341	1.187	1.2277	1	7	7	10	6	2	9	7	10	11	10	6	1	7	7	10	6	2	9	7	10	11	10	6	33.9	33.9	33.9	1.3043	1.0794	1.1425	1.2277	1.20836
RNPEP	Aminopeptidase B	Q9H4A4	Q9H4A4		0.308884	1.1506	0.95724	1.1431	1.07	1.1153	0.91965	1.0245	1.4829	1.427	1.2945	1.141	1.1923	2	7	8	11	9	6	7	6	7	9	10	6	2	7	8	11	9	6	7	6	7	9	10	6	33.4	33.4	33.4	1.1506	0.95724	1.141	1.1923	1.202
ALDOA	Fructose-bisphosphate aldolase A	P04075;P05062	P04075		0.63287	1.165	1.1216	1.1316	1.1799	1.3253	1.0261	1.0624	1.4094	1.4117	1.2722	1.2889	1.3768	15	16	14	14	15	14	15	17	14	14	18	13	14	15	12	13	13	12	13	15	13	12	16	12	81.3	81.3	71.7	1.3253	1.1216	1.1316	1.3768	1.18162
BAG2	BAG family molecular chaperone regulator 2	O95816	O95816		0.955221	0.6532	1.1964	0.99002	NaN	0.87025	NaN	NaN	1.5258	1.023	1.5176	1.2663	NaN	2	2	2	0	2	0	1	3	2	2	2	1	2	2	2	0	2	0	1	3	2	2	2	1	13.3	13.3	13.3	0.87025	1.357	1.12816	1.5258	0.641304
PFAS	Phosphoribosylformylglycinamidine synthase	O15067	O15067	+	2.24417	0.8692	0.97438	1.1237	1.2609	0.97492	0.89308	0.95678	1.5165	1.0556	1.146	1.152	1.4759	15	25	21	27	23	23	21	16	32	25	29	20	15	25	21	27	23	23	21	16	32	25	29	20	50.2	50.2	50.2	0.97492	0.97438	1.1237	1.4759	1.00055
MTHFD1	C-1-tetrahydrofolate synthase, cytoplasmic;Methylenetetrahydrofolate dehydrogenase;Methenyltetrahydrofolate cyclohydrolase;Formyltetrahydrofolate synthetase	P11586	P11586		0.447673	0.98475	0.9224	1.0526	1.1095	1.1365	1.0399	1.1236	1.2755	1.3001	1.1705	1.2097	1.3192	9	5	7	8	6	5	11	7	8	10	6	5	9	5	7	8	6	5	11	7	8	10	6	5	30.3	30.3	30.3	1.1365	1.0399	1.1236	1.2755	1.09289
ROCK2	Rho-associated protein kinase 2	O75116	O75116		0.443835	NaN	1.1935	1.0834	1.2094	NaN	NaN	NaN	1.892	1.0501	1.089	1.1574	NaN	0	2	2	3	1	0	1	2	4	5	3	0	0	1	2	2	1	0	0	2	3	3	2	0	8.9	8.9	7	1.0501	1.14125	1.1204	1.5507	0.920131
UBA6	Ubiquitin-like modifier-activating enzyme 6	A0AVT1;A0AVT1-2;A0AVT1-3;A0AVT1-4	A0AVT1;A0AVT1-2		0.177107	NaN	1.2005	NaN	1.0639	NaN	NaN	1.0311	1.5932	NaN	1.1475	1.1991	NaN	0	2	0	2	1	0	3	3	1	5	3	0	0	2	0	2	1	0	3	3	1	5	3	0	10.5	10.5	10.5	NaN	1.174	1.1151	1.32855	#VALUE!
SRP68	Signal recognition particle 68 kDa protein	Q9UHB9;Q9UHB9-2	Q9UHB9;Q9UHB9-2		0.133577	NaN	0.99346	NaN	1.0598	0.98535	0.92783	0.8638	NaN	1.1815	1.0215	1.3655	NaN	0	2	1	3	4	2	2	1	3	3	2	1	0	2	1	3	4	2	2	1	3	3	2	1	15.3	15.3	15.3	1.08343	0.99346	1.11465	1.0598	1.09056
PAICS	Multifunctional protein ADE2;Phosphoribosylaminoimidazole-succinocarboxamide synthase;Phosphoribosylaminoimidazole carboxylase	P22234;P22234-2	P22234;P22234-2		1.07606	1.1565	1.058	1.1145	1.2166	1.309	0.96458	0.97062	1.3758	1.3676	1.217	1.2395	1.3705	16	19	19	22	20	20	18	19	19	20	21	15	16	19	19	22	20	20	18	19	19	20	21	15	66.6	66.6	66.6	1.309	1.058	1.1145	1.3705	1.23724
MAP4	Microtubule-associated protein 4	P27816;P27816-6;P27816-2;P27816-7	P27816;P27816-6;P27816-2	+	2.17888	0.91689	1.0012	1.1094	1.3094	1.0322	0.92977	0.99315	1.5147	1.1168	1.1725	1.2289	1.4847	28	29	35	34	39	31	34	34	35	33	34	30	12	10	14	13	15	14	15	13	13	12	13	13	56.2	56.2	20.4	1.0322	1.0012	1.1094	1.4847	1.03096
LDHB	L-lactate dehydrogenase B chain	P07195	P07195		0.827883	1.0822	1.0608	1.1079	1.1908	1.2178	1.0064	1.0102	1.3613	1.3167	1.1879	1.2394	1.322	14	16	15	15	16	13	14	12	15	15	15	17	14	16	15	15	16	13	14	12	15	15	15	17	58.4	53	53	1.2178	1.0608	1.1079	1.322	1.148
POLR2B	DNA-directed RNA polymerase II subunit RPB2	P30876	P30876		0.339848	1.0881	1.0829	1.171	1.6348	1.2254	1.0689	0.74064	NaN	1.1685	1.3956	1.1073	NaN	3	8	6	9	7	2	5	0	8	5	3	1	3	8	6	9	7	2	5	0	8	5	3	1	16.9	16.9	16.9	1.1685	1.0829	1.1073	1.6348	1.07905
VARS	Valine--tRNA ligase	P26640	P26640	+	1.68575	1.0122	1.0367	1.1034	1.2573	1.1861	0.95759	1.0423	1.4344	1.2417	1.1391	1.1915	1.3661	6	7	7	7	5	4	6	5	17	9	16	4	6	7	7	7	5	4	6	5	17	9	16	4	25.7	25.7	25.7	1.1861	1.0367	1.1034	1.3661	1.14411
NUBP1	Cytosolic Fe-S cluster assembly factor NUBP1	P53384;P53384-2;REV__Q8N7X0	P53384;P53384-2	+	1.50602	1.1096	1.0629	1.1009	1.3684	1.3461	0.94997	1.01	1.5722	1.3955	1.2122	1.2851	1.433	2	4	3	5	4	3	3	2	4	4	3	3	2	4	3	5	4	3	3	2	4	4	3	3	27.8	27.8	27.8	1.3461	1.0629	1.1009	1.433	1.26644
RANBP3	Ran-binding protein 3	Q9H6Z4;Q9H6Z4-2;Q9H6Z4-3	Q9H6Z4;Q9H6Z4-2;Q9H6Z4-3		0.0486378	NaN	NaN	NaN	1.0853	1.445	NaN	NaN	NaN	1.42	0.99083	1.1008	1.6887	0	1	1	3	3	0	0	1	2	4	5	2	0	1	1	3	3	0	0	1	2	4	5	2	17.5	17.5	17.5	1.4325	0.99083	1.1008	1.387	1.44576
PRMT1	Protein arginine N-methyltransferase 1	Q99873;Q99873-2;Q99873-3;Q9NR22;Q9NR22-2	Q99873;Q99873-2;Q99873-3		0.635879	1.0548	0.98309	1.0992	1.1032	1.1427	0.92666	1.0012	1.2176	1.2442	1.1533	1.1614	1.2268	6	6	8	10	8	9	8	7	11	11	12	6	6	6	8	10	8	9	8	7	11	11	12	6	52.9	52.9	52.9	1.1427	0.98309	1.0992	1.2176	1.16236
ATXN2L	Ataxin-2-like protein	Q8WWM7-3;Q8WWM7;Q8WWM7-2;Q8WWM7-4;Q8WWM7-5;Q8WWM7-8;Q8WWM7-6;Q8WWM7-7	Q8WWM7-3;Q8WWM7;Q8WWM7-2;Q8WWM7-4;Q8WWM7-5;Q8WWM7-8;Q8WWM7-6	+	1.78806	0.82637	1.0224	1.0991	1.2121	0.89893	0.87619	0.85125	1.421	0.99571	1.166	1.161	1.4607	6	9	9	7	10	7	10	7	10	9	10	3	6	9	9	7	10	7	10	7	10	9	10	3	18	18	18	0.89893	1.0224	1.0991	1.421	0.879235
SPAG5	Sperm-associated antigen 5	Q96R06	Q96R06	+	1.39609	NaN	1.1259	NaN	2.3296	0.70684	NaN	1.0989	NaN	0.80772	1.2801	NaN	NaN	0	5	0	2	3	1	2	1	5	3	1	0	0	5	0	2	3	1	2	1	5	3	1	0	18.6	18.6	18.6	0.75728	1.203	1.0989	2.3296	0.629493
SND1	Staphylococcal nuclease domain-containing protein 1	Q7KZF4	Q7KZF4		0.76473	0.97363	1.0226	1.0961	1.2276	1.2562	0.98024	1.0163	1.264	1.338	1.1738	1.2146	1.6419	5	9	7	13	7	9	17	7	16	17	18	7	5	9	7	13	7	9	17	7	16	17	18	7	40.9	40.9	40.9	1.2562	1.0226	1.0961	1.264	1.22844
MSN	Moesin	P26038	P26038		0.282773	1.039	1.1202	NaN	1.0423	1.3794	0.87659	0.85658	NaN	1.3426	1.0519	1.3351	1.1056	2	2	1	3	2	2	3	1	5	6	2	3	2	2	1	3	2	2	3	1	5	6	2	3	31.7	22.2	22.2	1.3426	1.0519	1.09584	1.07395	1.27636
PPIA	Peptidyl-prolyl cis-trans isomerase A	P62937;Q9Y536;A2BFH1	P62937		1.17406	1.2624	1.0924	1.093	1.1743	1.4806	1.0289	1.0257	1.3143	1.5313	1.2946	1.2791	1.3235	12	11	10	12	10	11	10	11	9	11	11	10	12	11	10	12	10	11	10	11	9	11	11	10	55.2	55.2	55.2	1.4806	1.0924	1.093	1.3143	1.35536
CORO1C	Coronin-1C	Q9ULV4;Q6QEF8;Q6QEF8-5;P31146;Q6QEF8-2;Q6QEF8-3;Q6QEF8-4	Q9ULV4		0.900619	1.011	0.92773	1.093	1.1897	0.92786	0.82646	0.91143	1.3614	1.195	1.2108	1.1247	1.2922	5	11	8	9	9	10	9	10	10	11	10	7	5	11	8	9	9	10	9	10	10	11	10	7	44.1	44.1	44.1	1.011	0.92773	1.093	1.2922	1.08976
ILF2	Interleukin enhancer-binding factor 2	Q12905	Q12905		0.150344	NaN	NaN	NaN	NaN	0.94538	0.81719	0.87474	1.7675	0.88352	1.0881	1.3051	NaN	1	1	1	1	3	1	4	2	8	7	4	1	1	1	1	1	3	1	4	2	8	7	4	1	28.2	28.2	28.2	0.91445	0.952645	1.08992	1.7675	0.959906
VASP	Vasodilator-stimulated phosphoprotein	P50552	P50552		1.23319	0.6409	0.86576	1.1985	1.0457	0.71291	NaN	0.92838	NaN	0.8889	0.96729	1.0883	NaN	2	4	2	5	4	2	5	1	5	5	7	1	2	4	2	5	4	2	5	1	5	5	7	1	35	35	35	0.71291	0.916525	1.0883	1.0457	0.77784
FAM105B	Protein FAM105B	Q96BN8	Q96BN8	+	1.83538	1.0808	1.0624	1.0867	1.324	1.1406	0.85101	1.0715	1.4643	1.2072	1.2079	1.1951	1.4355	3	10	6	8	10	7	8	3	8	7	10	2	3	10	6	8	10	7	8	3	8	7	10	2	43.8	43.8	43.8	1.1406	1.0624	1.0867	1.4355	1.07361
GPI	Glucose-6-phosphate isomerase	P06744;P06744-2	P06744;P06744-2		0.5407	1.0436	1.0673	1.0843	1.1125	1.304	0.94278	0.9687	1.32	1.3017	1.2171	1.1793	1.3121	6	7	9	9	6	7	9	6	14	11	13	10	5	5	6	7	4	5	6	3	10	7	8	7	42.8	42.8	29.9	1.3017	1.0673	1.0843	1.3121	1.21962
CAST	Calpastatin	P20810-6;P20810-7;P20810-5;P20810;P20810-2;P20810-4;P20810-3	P20810-6;P20810-7;P20810-5;P20810;P20810-2;P20810-4;P20810-3	+	1.43433	0.95514	0.98206	1.0838	1.1388	1.0982	0.93108	0.92388	1.3712	1.1393	1.0677	1.1304	1.3289	12	15	16	17	16	11	14	11	11	13	13	13	12	15	16	17	16	11	14	11	11	13	13	13	43.7	43.7	43.7	1.0982	0.98206	1.0838	1.3289	1.11826
CAPG	Macrophage-capping protein	P40121	P40121		0.101199	1.1053	1.2949	1.0809	1.1489	NaN	NaN	1.0741	1.3246	1.5041	1.0739	1.2941	NaN	3	2	2	4	1	1	4	2	3	3	4	0	3	2	2	4	1	1	4	2	3	3	4	0	37.1	37.1	37.1	1.3047	1.1844	1.0809	1.23675	1.10157
IDE	Insulin-degrading enzyme	P14735;P14735-2	P14735;P14735-2		1.21819	NaN	1.0817	1.2179	1.5038	1.3919	NaN	0.93874	1.6981	1.7879	1.3354	NaN	1.6613	1	2	2	4	5	0	5	2	2	3	1	4	1	2	2	4	5	0	5	2	2	3	1	4	13.2	13.2	13.2	1.5899	1.20855	1.07832	1.6613	1.31554
MARCKS	Myristoylated alanine-rich C-kinase substrate	P29966	P29966		0.784169	1.0333	0.95866	1.078	1.1089	1.1937	0.85827	0.99897	1.369	1.3522	1.1909	1.0955	1.2921	5	5	6	5	7	4	5	7	6	5	5	4	5	5	6	5	7	4	5	7	6	5	5	4	42.5	42.5	42.5	1.1937	0.95866	1.078	1.2921	1.24518
HARS	Histidine--tRNA ligase, cytoplasmic	P12081;P49590	P12081	+	1.7756	0.97678	0.92135	1.0775	1.1596	1.122	0.83281	0.89481	1.3461	1.1323	1.0209	1.0846	1.2589	13	20	19	22	18	17	21	17	19	20	22	13	13	20	19	22	18	17	21	17	19	20	22	13	60.3	60.3	60.3	1.122	0.92135	1.0775	1.2589	1.21778
DYNLL1;DYNLL2	Dynein light chain 1, cytoplasmic;Dynein light chain 2, cytoplasmic	P63167;Q96FJ2	P63167;Q96FJ2	+	1.36634	0.73447	NaN	1.1255	1.4333	0.81341	0.81955	0.81771	1.2405	1.0143	0.95207	1.0772	NaN	2	1	2	2	2	2	2	2	2	2	2	1	2	1	2	2	2	2	2	2	2	2	2	1	24.7	24.7	24.7	0.81341	0.88581	1.0772	1.3369	0.918267
HDGF	Hepatoma-derived growth factor	P51858	P51858		1.21064	0.99611	1.0469	1.0757	1.1751	1.0837	1.0534	0.93731	1.4753	1.1911	1.2052	1.1518	1.3479	5	7	5	6	6	4	6	6	4	4	6	6	5	7	5	6	6	4	6	6	4	4	6	6	45	45	41.7	1.0837	1.0534	1.0757	1.3479	1.02876
CAND1	Cullin-associated NEDD8-dissociated protein 1	Q86VP6;Q86VP6-2;Q86VP6-3;O75155;O75155-2	Q86VP6;Q86VP6-2	+	1.45376	1.2224	0.99491	1.0739	1.0707	1.329	0.98508	0.92302	1.2683	1.3652	1.1527	1.1588	1.2173	11	21	14	17	11	9	24	15	21	28	27	6	11	21	14	17	11	9	24	15	21	28	27	6	38.5	38.5	38.5	1.329	0.99491	1.0739	1.2173	1.3358
QARS	Glutamine--tRNA ligase	P47897	P47897	+	1.96663	0.82418	0.97654	1.0702	1.1872	0.93617	0.91615	0.88987	1.3243	0.97019	1.1104	1.1602	1.3587	19	20	20	23	27	16	21	14	26	25	24	14	19	20	20	23	27	16	21	14	26	25	24	14	61.3	61.3	61.3	0.93617	0.97654	1.0702	1.3243	0.95866
GSTM3	Glutathione S-transferase Mu 3	P21266;P28161	P21266		0.921515	1.1063	1.0035	1.0685	1.1243	1.3068	0.94673	0.95069	1.2041	1.4259	1.1706	1.1769	1.2754	5	13	12	14	11	10	13	9	13	14	16	10	4	12	11	13	10	9	12	8	12	13	15	9	77.8	77.8	73.8	1.3068	1.0035	1.0685	1.2041	1.30224
ACOT9	Acyl-coenzyme A thioesterase 9, mitochondrial	Q9Y305-4;Q9Y305;Q9Y305-2;Q9Y305-3	Q9Y305-4;Q9Y305;Q9Y305-2;Q9Y305-3	+	1.44504	0.79639	0.91912	1.0669	1.1318	0.91538	0.85766	0.85848	1.323	1.0331	1.0976	1.0864	1.2779	3	9	6	11	9	4	6	3	9	8	10	5	3	9	6	11	9	4	6	3	9	8	10	5	36.8	36.8	36.8	0.91538	0.91912	1.0669	1.2779	0.995931
NAA15	N-alpha-acetyltransferase 15, NatA auxiliary subunit	Q9BXJ9;Q9BXJ9-4;Q6N069;Q6N069-2;Q6N069-3;Q6N069-4;Q6N069-5	Q9BXJ9;Q9BXJ9-4	+	1.55277	1.014	0.92285	1.0668	1.1302	1.0154	0.89045	0.8359	1.1819	1.0694	0.9869	1.0754	1.3644	4	6	11	13	8	9	11	5	16	16	11	6	3	6	10	12	7	8	10	4	15	15	10	6	34.6	34.6	33.9	1.0154	0.92285	1.0668	1.1819	1.10029
C22orf28	tRNA-splicing ligase RtcB homolog	Q9Y3I0	Q9Y3I0		0.0320949	NaN	NaN	NaN	0.9192	1.2466	NaN	1.0564	NaN	0.91083	1.0162	1.0671	NaN	0	0	0	4	2	0	2	0	3	5	6	1	0	0	0	4	2	0	2	0	3	5	6	1	23.2	23.2	23.2	1.07872	1.0162	1.06175	0.9192	1.06152
NASP	Nuclear autoantigenic sperm protein	P49321-3;P49321;P49321-2	P49321-3;P49321;P49321-2		0.921508	NaN	0.86951	1.0587	1.1891	1.177	0.91678	0.9034	1.293	1.3076	1.1963	1.199	1.281	1	5	6	6	4	2	8	5	6	7	6	7	1	5	6	6	4	2	8	5	6	7	6	7	16.8	16.8	16.8	1.2423	0.91678	1.0587	1.281	1.35507
GSR	Glutathione reductase, mitochondrial	P00390;P00390-2;P00390-3;P00390-4;P00390-5	P00390;P00390-2;P00390-3;P00390-4;P00390-5	+	2.12871	1.1831	0.92408	1.0578	1.1763	1.1481	0.88817	0.86261	1.2337	1.1239	1.042	1.0666	1.2151	4	6	7	11	8	4	6	8	10	9	11	4	4	6	7	11	8	4	6	8	10	9	11	4	47.1	47.1	47.1	1.1481	0.92408	1.0578	1.2151	1.24242
GSTP1	Glutathione S-transferase P	P09211	P09211		0.662891	1.0382	0.99365	1.0573	1.0951	1.2248	0.93506	0.93902	1.3365	1.3822	1.1753	1.172	1.31	8	7	8	8	7	8	8	8	6	6	7	6	8	7	8	8	7	8	8	8	6	6	7	6	60.5	60.5	60.5	1.2248	0.99365	1.0573	1.31	1.23263
GAPDH	Glyceraldehyde-3-phosphate dehydrogenase	P04406;O14556	P04406		0.471069	1.0178	0.92018	1.0567	1.0593	1.165	0.91727	0.94493	1.2802	1.2957	1.2038	1.156	1.2746	7	9	8	12	11	11	8	6	13	12	12	5	7	9	8	12	11	11	8	6	13	12	12	5	60.9	60.9	60.9	1.165	0.92018	1.0567	1.2746	1.26606
ANXA5	Annexin A5	P08758	P08758		0.187069	NaN	1.1102	NaN	1.0349	NaN	0.96823	0.85365	1.2615	1.8096	1.3229	1.2585	1.4151	1	3	1	3	1	3	4	2	3	6	4	2	1	3	1	3	1	3	4	2	3	6	4	2	31.9	31.9	31.9	1.8096	1.1102	1.05607	1.2615	1.62998
GEMIN5	Gem-associated protein 5	Q8TEQ6	Q8TEQ6	+	1.85003	0.70414	0.89525	1.0559	1.4664	0.75527	0.83622	0.90092	NaN	0.98119	1.2388	1.2545	1.9939	4	8	8	10	13	6	5	0	12	12	11	2	4	8	8	10	13	6	5	0	12	12	11	2	24.5	24.5	24.5	0.75527	0.89525	1.0559	1.73015	0.843641
AIMP2	Aminoacyl tRNA synthase complex-interacting multifunctional protein 2	Q13155	Q13155	+	2.09338	0.68287	0.91488	1.0555	1.2333	0.82427	0.74823	0.86417	1.1831	0.87533	1.0093	1.0798	1.5183	4	5	5	6	7	2	6	2	7	6	6	2	4	5	5	6	7	2	6	2	7	6	6	2	53.4	53.4	53.4	0.82427	0.91488	1.0555	1.2333	0.90096
EIF2B3	Translation initiation factor eIF-2B subunit gamma	Q9NR50;Q9NR50-2;Q9NR50-3	Q9NR50;Q9NR50-2;Q9NR50-3	+	1.91182	NaN	0.96473	1.1177	1.272	0.82493	1.0634	0.94738	1.882	0.95784	1.1464	1.0547	1.601	1	4	2	3	3	2	3	2	6	5	5	2	1	4	2	3	3	2	3	2	6	5	5	2	27	27	27	0.891385	1.0634	1.0547	1.601	0.838241
FEN1	Flap endonuclease 1	P39748	P39748	+	1.76097	NaN	1.0372	1.0523	1.3707	NaN	0.96817	0.85411	1.6931	1.1669	1.1029	1.109	NaN	1	2	3	3	1	3	3	2	3	3	3	1	1	2	3	3	1	3	3	2	3	3	3	1	16.8	16.8	16.8	1.1669	1.0372	1.0523	1.5319	1.12505
MIF	Macrophage migration inhibitory factor	P14174	P14174		0.522752	1.0548	0.98056	0.95653	1.1174	1.2956	NaN	1.0518	NaN	1.2617	1.2541	1.0646	NaN	2	2	2	2	2	0	2	1	2	2	2	2	2	2	2	2	2	0	2	1	2	2	2	2	17.4	17.4	17.4	1.2617	1.11733	1.0518	1.1174	1.12921
ZC3HAV1	Zinc finger CCCH-type antiviral protein 1	Q7Z2W4;Q7Z2W4-2;Q7Z2W4-3;Q7Z2W4-4;Q7Z2W4-5;Q9H0J9	Q7Z2W4;Q7Z2W4-2;Q7Z2W4-3		1.26912	0.90343	0.74928	1.0932	1.0149	0.89511	0.75927	0.80031	1.3746	1.0133	0.95501	1.0497	1.2006	2	5	2	10	6	4	7	3	7	13	9	3	2	5	2	10	6	4	7	3	7	13	9	3	28.2	28.2	28.2	0.90343	0.75927	1.0497	1.2006	1.18987
CPNE3	Copine-3	O75131;Q9UBL6;Q9HCH3;Q96A23-2;Q86YQ8;Q9UBL6-2;O95741;Q96A23;Q8IYJ1;Q96FN4	O75131		1.02197	NaN	0.98673	1.0487	1.0382	1.4468	1.1312	NaN	1.1686	1.2729	1.1882	NaN	1.2272	1	2	2	4	2	3	1	2	2	3	1	2	1	2	2	4	2	3	1	2	2	3	1	2	15.3	15.3	15.3	1.35985	1.1312	1.0487	1.1686	1.20213
PURB	Transcriptional activator protein Pur-beta	Q96QR8;Q9UJV8;Q9UJV8-2	Q96QR8	+	1.30363	0.87575	1.0086	1.0487	1.3104	0.89519	0.87085	0.89454	1.4377	1.107	1.0358	1.2535	2.3146	3	3	3	3	3	3	2	2	3	3	2	2	1	2	2	2	2	1	2	1	2	2	1	1	26	26	22.1	0.89519	1.0086	1.0487	1.4377	0.887557
ACACA	Acetyl-CoA carboxylase 1;Biotin carboxylase	Q13085-4;Q13085;Q13085-2;Q13085-3;O00763;O00763-2	Q13085-4;Q13085;Q13085-2;Q13085-3	+	1.83721	0.89974	0.97689	1.0413	1.2213	1.0442	0.92423	0.90941	1.3377	1.1249	1.1402	1.0799	1.4176	38	60	53	64	67	46	45	32	62	50	59	24	38	60	53	64	67	46	45	32	62	50	59	24	55.9	55.9	55.9	1.0442	0.97689	1.0413	1.3377	1.0689
PLS3	Plastin-3	P13797;P13796;Q14651	P13797	+	1.63595	1.1399	0.94544	1.0383	1.1401	1.1388	0.91979	0.87158	1.3531	1.3057	1.0886	1.0935	1.3909	12	23	22	25	22	17	22	19	23	22	26	16	12	23	22	25	22	17	22	19	23	22	26	16	59.7	59.7	59.7	1.1399	0.94544	1.0383	1.3531	1.20568
ADAR	Double-stranded RNA-specific adenosine deaminase	P55265-4;P55265;P55265-2;P55265-3;P55265-5	P55265-4;P55265;P55265-2;P55265-3;P55265-5	+	1.84867	NaN	1.2774	1.4239	1.9307	0.85746	0.81556	1.0333	2.019	1.2456	1.1309	1.0318	NaN	1	6	3	3	6	2	4	3	4	7	5	1	1	6	3	3	6	2	4	3	4	7	5	1	11.3	11.3	11.3	1.05153	1.1309	1.0333	1.97485	0.929817
OTUB1	Ubiquitin thioesterase OTUB1	Q96FW1;Q96FW1-2	Q96FW1;Q96FW1-2		1.04256	1.0369	0.97114	1.0662	1.0739	1.174	0.90244	0.89668	1.3843	1.2185	1.0843	1.0332	1.1963	4	5	5	7	6	4	6	4	7	8	9	4	4	5	5	7	6	4	6	4	7	8	9	4	45.8	45.8	45.8	1.174	0.97114	1.0332	1.1963	1.20889
AKR1B1	Aldose reductase	P15121;C9JRZ8;C9JRZ8-2	P15121		1.07817	1.0208	0.94587	1.0306	1.0737	1.1114	0.90459	0.93231	1.4252	1.2298	1.1178	1.1382	1.4521	4	6	5	6	8	7	8	5	8	11	8	4	4	6	5	6	8	7	8	5	8	11	8	4	54.4	54.4	54.4	1.1114	0.94587	1.0306	1.4252	1.175
NAP1L1	Nucleosome assembly protein 1-like 1	P55209	P55209		0.677617	NaN	0.92166	1.0301	1.0496	0.87872	0.72776	0.90145	1.1556	0.99797	1.0166	1.083	1.0486	1	3	3	4	3	3	3	3	4	4	5	2	0	2	2	3	2	2	2	2	3	3	4	1	17.9	17.9	15.3	0.938345	0.92166	1.0301	1.0496	1.0181
GFPT1	Glucosamine--fructose-6-phosphate aminotransferase [isomerizing] 1	Q06210;Q06210-2	Q06210;Q06210-2	+	2.22585	0.85322	1.0445	1.0296	1.3695	0.93456	0.92612	0.95881	1.5755	1.063	1.2378	1.2711	1.5417	8	18	14	18	16	9	14	12	17	17	11	6	4	14	11	15	12	7	11	9	13	14	8	4	57.1	57.1	44.3	0.93456	1.0445	1.0296	1.5417	0.894744
FTO	Alpha-ketoglutarate-dependent dioxygenase FTO	Q9C0B1;Q9C0B1-2;Q9C0B1-4;Q9C0B1-3	Q9C0B1		0.618368	NaN	0.82777	1.029	1.1864	1.1914	0.73244	0.54175	NaN	1.2824	1.0481	1.1139	NaN	0	3	2	6	2	2	2	0	3	3	4	0	0	3	2	6	2	2	2	0	3	3	4	0	21.2	21.2	21.2	1.2369	0.82777	1.029	1.1864	1.49426
PRKAA1	5-AMP-activated protein kinase catalytic subunit alpha-1	Q13131-2;Q13131;P54646	Q13131-2;Q13131		0.0756149	NaN	0.89627	NaN	1.3858	1.017	NaN	0.8041	NaN	0.81128	0.95685	1.2469	NaN	0	2	1	3	3	0	2	1	3	3	2	0	0	2	1	3	3	0	2	1	3	3	2	0	9.9	9.9	9.9	0.91414	0.92656	1.0255	1.3858	0.986596
CS	Citrate synthase, mitochondrial	O75390	O75390	+	1.42087	0.90359	0.91779	1.0253	1.1729	0.95491	NaN	0.92057	1.2452	0.99477	1.0822	1.0679	NaN	2	3	3	3	5	1	3	2	5	7	5	1	2	3	3	3	5	1	3	2	5	7	5	1	20.2	20.2	20.2	0.95491	0.999995	1.0253	1.20905	0.954915
PPP4R1	Serine/threonine-protein phosphatase 4 regulatory subunit 1	Q8TF05;Q8TF05-2	Q8TF05;Q8TF05-2		1.07669	NaN	0.95628	NaN	1.2422	1.2852	0.87157	NaN	NaN	1.0301	0.84862	1.0235	NaN	0	3	1	2	2	2	1	1	2	2	5	0	0	3	1	2	2	2	1	1	2	2	5	0	7.1	7.1	7.1	1.15765	0.87157	1.0235	1.2422	1.32824
PMPCB	Mitochondrial-processing peptidase subunit beta	O75439	O75439	+	2.36879	0.89486	0.94932	1.0261	1.2975	1.0206	0.99585	0.93864	1.6225	1.1523	1.189	1.0227	1.5148	6	8	5	11	7	5	7	5	6	9	8	2	5	7	5	10	6	4	7	4	6	9	8	2	39.3	39.3	37.8	1.0206	0.99585	1.0227	1.5148	1.02485
SLC3A2	4F2 cell-surface antigen heavy chain	P08195-4;P08195;P08195-3;P08195-2	P08195-4;P08195;P08195-3;P08195-2		0.289897	NaN	NaN	NaN	1.0529	NaN	NaN	0.94769	1.118	1.7367	1.5881	1.0957	NaN	1	1	1	3	1	1	2	3	3	2	2	1	1	1	1	3	1	1	2	3	3	2	2	1	11	11	11	1.7367	1.5881	1.0217	1.08545	1.09357
CTTN	Src substrate cortactin	Q14247;Q14247-3;Q14247-2	Q14247;Q14247-3;Q14247-2	+	2.31865	1.0103	1.0123	1.02	1.3092	1.132	0.87267	0.86767	1.4937	1.2017	1.0652	1.1193	1.3766	10	12	12	12	15	11	12	10	12	12	12	8	10	12	12	12	15	11	12	10	12	12	12	8	41.8	41.8	41.8	1.132	1.0123	1.02	1.3766	1.11825
MDH1	Malate dehydrogenase, cytoplasmic	P40925;P40925-2	P40925;P40925-2		1.07916	1.1043	1.0301	0.83026	1.2292	1.176	0.8804	1.0198	1.4476	1.253	1.2317	1.1929	1.3399	4	4	4	5	6	4	5	4	8	6	5	5	4	4	4	5	6	4	5	4	8	6	5	5	35	35	35	1.176	1.0301	1.0198	1.3399	1.14164
LRRFIP1	Leucine-rich repeat flightless-interacting protein 1	Q32MZ4-2;Q32MZ4-3;Q32MZ4;Q9Y608;Q9Y608-4;Q9Y608-2	Q32MZ4-2;Q32MZ4-3;Q32MZ4		1.14523	0.90585	0.82114	1.0173	1.0508	1.058	0.83663	0.8749	1.2263	1.1422	1.0061	1.0256	1.1486	2	7	6	7	7	4	7	3	9	8	9	6	2	7	6	7	7	4	7	3	9	8	9	6	28.8	28.8	28.8	1.058	0.83663	1.0173	1.1486	1.2646
BAG3	BAG family molecular chaperone regulator 3	O95817	O95817	+	1.56917	0.80418	0.91922	1.0169	1.1743	0.86841	0.83107	0.89427	1.2304	0.96048	1.0699	1.0387	NaN	2	3	3	4	3	2	3	3	7	7	4	0	2	3	3	4	3	2	3	3	7	7	4	0	27.3	27.3	27.3	0.86841	0.91922	1.0169	1.20235	0.944725
XRCC5	X-ray repair cross-complementing protein 5	P13010	P13010		1.12432	1.1204	0.99201	1.0166	1.1011	1.185	0.9268	0.82753	1.2016	1.3224	1.1468	1.0894	1.2401	8	13	12	18	18	12	20	13	21	21	21	10	8	13	12	18	18	12	20	13	21	21	21	10	57.9	57.9	57.9	1.185	0.99201	1.0166	1.2016	1.19454
HMGB1	High mobility group protein B1	P09429;B2RPK0;P26583	P09429		1.2464	1.1241	0.8819	1.0164	1.0444	1.2632	0.74298	0.83449	NaN	1.3139	1.0934	1.018	1.1687	2	2	4	2	4	2	3	1	7	5	5	3	2	2	4	2	4	2	3	1	7	5	5	3	39.5	39.5	39.5	1.2632	0.8819	1.0164	1.10655	1.43236
DNMT1	DNA (cytosine-5)-methyltransferase 1	P26358-2;P26358;P26358-3	P26358-2;P26358;P26358-3		0.260395	NaN	NaN	1.0146	1.9682	1.1395	1.1546	0.83688	1.4709	1.7567	1.7693	1.6127	NaN	0	0	2	2	2	2	2	2	2	4	4	0	0	0	2	2	2	2	2	2	2	4	4	0	8	8	8	1.4481	1.46195	1.0146	1.71955	0.990526
ACTG1	Actin, cytoplasmic 2;Actin, cytoplasmic 2, N-terminally processed	P63261	P63261		1.19589	1.1169	0.96258	1.0115	0.91358	1.2845	0.90326	0.83498	1.0282	1.353	1.1521	1.0872	1.0635	18	19	19	21	20	20	19	20	21	21	21	20	1	1	1	1	1	1	1	1	2	2	2	1	89.6	89.6	4.8	1.2845	0.96258	1.0115	1.0282	1.33443
TPI1	Triosephosphate isomerase	P60174;P60174-1	P60174;P60174-1		0.848014	1.0228	0.96129	1.0109	1.0555	1.2185	0.91564	0.88689	1.2699	1.2431	1.1066	1.1198	1.2442	12	11	9	10	10	11	13	11	9	10	10	10	12	11	9	10	10	11	13	11	9	10	10	10	65.7	65.7	65.7	1.2185	0.96129	1.0109	1.2442	1.26757
ACTC1;ACTA2;ACTA1;ACTG2	Actin, alpha cardiac muscle 1;Actin, aortic smooth muscle;Actin, alpha skeletal muscle;Actin, gamma-enteric smooth muscle	P68032;P62736;P68133;P63267	P68032;P62736;P68133;P63267		0.775435	1.0718	0.97328	1.0104	0.88182	1.2671	0.89803	0.85006	1.0333	1.2849	1.1854	1.0782	1.0852	1	1	1	2	2	1	1	1	1	1	1	1	1	1	1	2	2	1	1	1	1	1	1	1	42.7	9	9	1.2671	0.97328	1.0104	1.0333	1.30189
GANAB	Neutral alpha-glucosidase AB	Q14697;Q14697-2	Q14697;Q14697-2		0.64923	0.91622	0.92841	1.0076	1.0205	1.1357	0.83999	0.87837	1.1792	1.1698	1.021	1.0396	1.0805	5	7	9	8	11	6	16	5	11	11	13	6	5	7	9	8	11	6	16	5	11	11	13	6	42.4	42.4	42.4	1.1357	0.92841	1.0076	1.0805	1.22327
GPHN	Gephyrin;Molybdopterin adenylyltransferase;Molybdopterin molybdenumtransferase	Q9NQX3-2;Q9NQX3	Q9NQX3-2;Q9NQX3		0.592877	NaN	NaN	NaN	1.1147	0.94312	NaN	0.99462	1.4178	1.0964	1.1113	1.0163	NaN	1	0	1	2	3	0	2	2	3	2	2	1	1	0	1	2	3	0	2	2	3	2	2	1	14.6	14.6	14.6	1.01976	1.1113	1.00546	1.26625	0.917628
RIC8A	Synembryn-A	Q9NPQ8-3;Q9NPQ8;Q9NPQ8-4;Q9NPQ8-2	Q9NPQ8-3;Q9NPQ8;Q9NPQ8-4;Q9NPQ8-2		0.0994539	NaN	0.69482	1.0027	NaN	NaN	NaN	0.71611	NaN	1.0824	1.0841	1.1324	NaN	1	2	2	1	2	1	2	1	3	3	2	0	1	2	2	1	2	1	2	1	3	3	2	0	9.9	9.9	9.9	1.0824	0.88946	1.0027	NaN	1.21692
PEPD	Xaa-Pro dipeptidase	P12955;P12955-2	P12955;P12955-2		1.04201	NaN	0.95722	1.1009	1.1787	0.96839	0.58118	0.92595	1.2834	1.0786	1.0403	0.99957	1.2157	1	4	3	7	3	2	4	3	5	6	4	2	1	4	3	7	3	2	4	3	5	6	4	2	25.2	25.2	25.2	1.02349	0.95722	0.99957	1.2157	1.06924
FSCN1	Fascin	Q16658	Q16658		1.07543	1.0406	0.91645	0.99873	1.0906	1.1873	0.86287	0.8611	1.209	1.2743	1.0878	1.1189	1.2356	12	13	12	12	13	9	12	11	16	12	17	10	12	13	12	12	13	9	12	11	16	12	17	10	53.8	53.8	53.8	1.1873	0.91645	0.99873	1.209	1.29554
PTBP1	Polypyrimidine tract-binding protein 1	P26599-3;P26599-2;P26599;O95758-4;O95758-5;O95758;O95758-2;O95758-6;O95758-1;Q9UKA9-3;Q9UKA9-4;Q9UKA9-2;Q9UKA9;Q9UKA9-6;Q9UKA9-5	P26599-3;P26599-2;P26599	+	2.04748	1.0182	0.91942	0.99863	1.1958	1.0786	0.85233	0.8957	1.3464	1.1634	1.0891	1.0785	1.3652	13	16	14	14	15	13	15	15	16	15	15	12	13	16	14	14	15	13	15	15	16	15	15	12	41.5	41.5	41.5	1.0786	0.91942	0.99863	1.3464	1.17313
ABCF1	ATP-binding cassette sub-family F member 1	Q8NE71;Q8NE71-2	Q8NE71;Q8NE71-2		0.788352	0.87071	0.86589	0.99805	1.1556	1.0074	0.76648	0.92178	1.1157	1.0386	1.051	1.0851	NaN	3	7	5	8	6	4	9	3	7	7	8	2	3	7	5	8	6	4	9	3	7	7	8	2	24.5	24.5	24.5	1.0074	0.86589	0.99805	1.13565	1.16343
KPNB1	Importin subunit beta-1	Q14974	Q14974		0.801653	0.98103	0.98425	0.99651	1.0769	1.1827	0.86663	0.86273	1.2072	1.2047	1.1012	1.0867	1.2137	8	15	17	23	24	14	23	14	25	20	24	17	8	15	17	23	24	14	23	14	25	20	24	17	51.5	51.5	51.5	1.1827	0.98425	0.99651	1.2072	1.20163
DIAPH1	Protein diaphanous homolog 1	O60610;O60610-3;O60610-2	O60610;O60610-3;O60610-2		0.483314	NaN	NaN	0.94048	1.0805	1.0608	NaN	NaN	1.183	1.2143	1.0337	1.052	NaN	0	1	3	6	4	0	2	3	5	9	6	0	0	1	3	6	4	0	2	3	5	9	6	0	21.9	21.9	21.9	1.13755	1.0337	0.99624	1.13175	1.10046
ACTR3	Actin-related protein 3	P61158;Q9P1U1;Q9P1U1-2;Q9P1U1-3;Q9C0K3	P61158		0.219148	NaN	1.0466	NaN	1.1226	NaN	NaN	0.87094	NaN	1.1729	1.0936	1.1166	NaN	0	2	1	2	0	1	5	0	3	4	3	1	0	2	1	2	0	1	5	0	3	4	3	1	24.6	24.6	24.6	1.1729	1.0701	0.99377	1.1226	1.09607
YWHAQ	14-3-3 protein theta	P27348	P27348		1.23462	1.1367	0.94369	0.99291	1.0036	1.2484	0.8793	0.86895	1.1902	1.4014	1.131	1.0823	1.1508	7	11	10	10	9	8	8	10	11	11	11	9	6	10	9	9	8	7	7	9	10	10	10	8	53.5	50.2	43.7	1.2484	0.94369	0.99291	1.1508	1.32289
TXLNG	Gamma-taxilin	Q9NUQ3;Q9NUQ3-2;Q9BZA5	Q9NUQ3;Q9NUQ3-2		0.30426	0.50319	0.81801	0.52349	1.174	0.81504	NaN	0.99207	NaN	1.0092	0.98431	1.2474	1.1602	2	5	2	3	3	2	4	1	7	7	6	2	2	5	2	3	3	2	4	1	7	7	6	2	20.6	20.6	20.6	0.81504	0.90116	0.99207	1.1671	0.904434
SRP9	Signal recognition particle 9 kDa protein	P49458;P49458-2	P49458;P49458-2		0	NaN	NaN	0.9905	1.2402	NaN	NaN	0.92099	NaN	1.2744	1.1195	1.1781	NaN	0	2	2	3	2	2	3	0	3	4	2	0	0	2	2	3	2	2	3	0	3	4	2	0	43	43	43	1.2744	1.1195	0.9905	1.2402	1.13837
THOP1	Thimet oligopeptidase	P52888	P52888	+	1.69298	0.9379	0.88434	1.0506	1.095	0.94922	0.88173	0.82138	1.1493	1.0725	0.91551	0.99028	1.3074	8	12	9	12	8	7	11	8	10	10	19	6	8	12	9	12	8	7	11	8	10	10	19	6	36.9	36.9	36.9	0.94922	0.88434	0.99028	1.1493	1.07337
ENO1	Alpha-enolase	P06733;P06733-2	P06733;P06733-2		0.735965	0.97452	0.93786	0.98727	1.0241	1.0901	0.89401	0.89572	1.2327	1.1732	1.0807	1.0691	1.1698	18	22	18	20	20	20	21	19	21	19	22	18	15	18	14	16	17	16	17	15	17	15	18	14	68.9	68.9	58.3	1.0901	0.93786	0.98727	1.1698	1.16233
CMBL	Carboxymethylenebutenolidase homolog	Q96DG6	Q96DG6		0.922153	NaN	0.74059	NaN	0.84909	1.3602	1.0097	0.8174	0.89054	1.299	1.1063	1.1518	NaN	1	2	1	5	3	2	3	3	3	3	3	1	1	2	1	5	3	2	3	3	3	3	3	1	25.3	25.3	25.3	1.3296	1.0097	0.9846	0.869815	1.31683
EIF4G1	Eukaryotic translation initiation factor 4 gamma 1	Q04637;Q04637-3;Q04637-4;Q04637-5;Q04637-6;REV__Q8NEG2	Q04637;Q04637-3;Q04637-4;Q04637-5;Q04637-6	+	1.70115	1.0595	0.91291	0.98428	1.0765	1.1682	0.84763	0.86905	1.2544	1.2321	1.0447	1.0315	1.2763	13	17	16	23	21	17	22	14	25	24	25	14	11	13	13	19	17	13	18	12	21	23	22	11	27.2	27.2	23.8	1.1682	0.91291	0.98428	1.2544	1.27964
PGLS	6-phosphogluconolactonase	O95336	O95336	+	1.60173	0.75768	0.85154	0.98083	1.1821	0.87404	0.81262	0.79394	1.253	0.95754	1.015	1.1326	1.1723	3	3	4	4	6	3	4	3	6	3	6	5	3	3	4	4	6	3	4	3	6	3	6	5	57.4	57.4	57.4	0.87404	0.85154	0.98083	1.1821	1.02642
PFKP	6-phosphofructokinase type C	Q01813;P17858;P17858-2	Q01813		0.902262	1.0315	0.81176	0.98078	0.95604	1.1129	0.91595	0.79217	1.1958	1.1828	1.0324	1.0342	1.2456	9	15	12	17	17	12	12	13	21	17	20	4	8	14	10	15	14	10	11	13	19	15	17	3	35.6	35.6	32.5	1.1129	0.91595	0.98078	1.1958	1.21502
KIF5B	Kinesin-1 heavy chain	P33176;Q12840	P33176		0.39801	0.90869	0.80212	0.98046	1.0158	1.0227	0.8091	0.82627	1.1268	1.1269	1.1405	0.99168	1.0883	4	6	7	9	6	4	7	4	10	8	11	3	3	4	5	7	3	1	4	2	8	6	9	2	30.3	30.3	23.4	1.0227	0.8091	0.98046	1.0883	1.264
PGAM1	Phosphoglycerate mutase 1	P18669;Q8N0Y7;P15259	P18669		0.0472542	1.0008	0.84317	NaN	0.8318	1.0971	NaN	0.82643	1.2802	1.1968	1.1281	1.1317	NaN	3	3	1	4	2	1	5	3	8	6	5	1	3	3	1	4	2	1	5	3	8	6	5	1	57.9	57.9	57.9	1.0971	0.985635	0.979065	1.056	1.11309
YWHAZ	14-3-3 protein zeta/delta	P63104	P63104		1.05894	1.1	0.90397	0.97895	1.0551	1.1896	0.87945	0.86862	1.1904	1.2174	1.1388	1.0886	1.2134	4	7	6	6	6	6	7	5	6	6	6	7	4	7	6	6	6	6	7	5	6	6	6	7	53.9	42.9	42.9	1.1896	0.90397	0.97895	1.1904	1.31597
CIAPIN1	Anamorsin	Q6FI81;Q6FI81-3;Q6FI81-2	Q6FI81;Q6FI81-3	+	1.81836	0.98605	0.95675	0.97861	1.1614	1.0714	0.81749	0.88338	1.3152	1.1247	1.0008	1.143	1.3362	6	11	9	9	9	8	10	8	11	9	10	10	6	11	9	9	9	8	10	8	11	9	10	10	67.6	67.6	67.6	1.0714	0.95675	0.97861	1.3152	1.11983
TRIO	Triple functional domain protein	O75962;O75962-2;O75962-5;O75962-4;O60229;O60229-2;O60229-3	O75962;O75962-2;O75962-5;O75962-4		0.263111	0.92707	0.99801	0.97849	1.2296	1.1057	0.78147	0.97056	NaN	1.286	1.1394	1.0503	NaN	2	8	2	3	2	2	2	0	4	3	4	0	2	8	2	3	2	2	2	0	4	3	4	0	5.5	5.5	5.5	1.1057	0.99801	0.97849	1.2296	1.1079
STRAP	Serine-threonine kinase receptor-associated protein	Q9Y3F4	Q9Y3F4		0.516936	0.96847	0.93278	0.9778	1.0139	1.0718	0.81504	0.82618	1.0439	1.1982	1.0414	1.0629	1.0539	7	12	6	13	10	10	11	10	9	11	12	4	7	12	6	13	10	10	11	10	9	11	12	4	64.3	64.3	64.3	1.0718	0.93278	0.9778	1.0439	1.14904
PBK	Lymphokine-activated killer T-cell-originated protein kinase	Q96KB5	Q96KB5	+	1.58631	0.61459	0.81598	0.97579	1.1234	0.80442	0.67437	0.80032	1.4867	0.77275	1.0071	1.0345	NaN	3	6	8	5	5	4	7	3	10	9	5	1	3	6	8	5	5	4	7	3	10	9	5	1	45.7	45.7	45.7	0.77275	0.81598	0.97579	1.30505	0.947021
DHX30	Putative ATP-dependent RNA helicase DHX30	Q7L2E3-2;Q7L2E3;Q7L2E3-3	Q7L2E3-2;Q7L2E3;Q7L2E3-3		1.25822	NaN	0.99373	0.97393	1.236	0.96476	0.84758	0.87952	1.3091	1.1781	1.0203	1.0817	NaN	0	7	4	8	4	2	6	4	12	10	6	1	0	7	4	8	4	2	6	4	12	10	6	1	18.2	18.2	18.2	1.07143	0.99373	0.97393	1.27255	1.07819
HNRNPK	Heterogeneous nuclear ribonucleoprotein K	P61978-2;P61978;P61978-3	P61978-2;P61978;P61978-3	+	1.60242	1.0091	0.90415	0.97385	1.1124	1.0679	0.82389	0.81806	1.2816	1.1391	1.0564	1.0406	1.2504	14	16	18	18	15	15	16	17	18	19	19	17	14	16	18	18	15	15	16	17	18	19	19	17	49.8	49.8	49.8	1.0679	0.90415	0.97385	1.2504	1.18111
LANCL1	LanC-like protein 1	O43813	O43813		0.412348	NaN	0.91569	0.97376	0.83236	1.0863	0.70617	0.7795	1.1839	1.0391	0.96048	1.0279	1.0741	1	5	4	2	2	2	4	4	5	5	4	2	1	5	4	2	2	2	4	4	5	5	4	2	39.1	39.1	39.1	1.0627	0.91569	0.97376	1.0741	1.16055
VPS35	Vacuolar protein sorting-associated protein 35	Q96QK1	Q96QK1		0.296771	NaN	0.92593	0.97157	0.90286	0.95905	0.91873	0.94719	1.4943	1.1007	1.0212	0.98982	NaN	0	4	3	2	3	2	2	2	4	5	3	0	0	4	3	2	3	2	2	2	4	5	3	0	19	19	19	1.02988	0.92593	0.97157	1.19858	1.11226
DSTN	Destrin	P60981;P60981-2	P60981;P60981-2		1.2581	1.0265	0.8912	0.97052	1.0729	1.1612	0.83666	0.8187	1.1821	1.2829	1.0467	1.0671	1.2291	10	12	10	12	9	10	11	11	10	11	12	8	10	12	10	12	9	10	11	11	10	11	12	8	73.3	73.3	73.3	1.1612	0.8912	0.97052	1.1821	1.30296
YWHAG	14-3-3 protein gamma;14-3-3 protein gamma, N-terminally processed	P61981	P61981		0.325871	NaN	0.89104	0.96797	0.97715	0.98374	0.8248	0.87921	1.1667	1.1239	1.1404	1.0314	1.1118	1	6	6	6	6	6	5	5	6	5	5	4	1	5	5	5	5	5	4	5	5	4	4	3	48.6	45.3	41.7	1.05382	0.89104	0.96797	1.1118	1.18269
FUBP1	Far upstream element-binding protein 1	Q96AE4-2;Q96AE4	Q96AE4-2;Q96AE4		0.111412	NaN	0.7768	0.9675	0.89525	0.86562	NaN	0.78966	NaN	1.0584	0.97913	1.2951	NaN	0	2	2	2	2	1	2	0	2	2	5	0	0	2	2	2	2	1	2	0	2	2	5	0	10.9	8.3	8.3	0.96201	0.877965	0.9675	0.89525	1.09573
DPYSL3	Dihydropyrimidinase-related protein 3	Q14195-2;Q14195;Q14117	Q14195-2;Q14195		0.972339	0.9918	0.94002	0.96716	1.1039	0.85104	0.86586	0.80551	1.3949	0.87966	1.2472	1.2317	1.4002	5	4	6	4	4	5	5	5	6	6	9	4	4	2	4	3	2	5	3	4	5	5	7	3	36	36	31.6	0.87966	0.94002	0.96716	1.3949	0.935789
GAPVD1	GTPase-activating protein and VPS9 domain-containing protein 1	Q14C86-6;Q14C86;Q14C86-2;Q14C86-5;Q14C86-4;Q14C86-3	Q14C86-6;Q14C86;Q14C86-2;Q14C86-5;Q14C86-4;Q14C86-3	+	1.89823	1.0438	0.95795	0.85122	1.3389	1.179	0.94329	0.9639	1.6514	1.2892	1.0408	1.1967	1.3551	2	6	4	8	5	4	8	5	11	13	11	2	2	6	4	8	5	4	8	5	11	13	11	2	20.9	20.9	20.9	1.179	0.95795	0.9639	1.3551	1.23075
TSN	Translin	Q15631	Q15631	+	1.39944	0.91549	0.92354	0.96287	1.039	NaN	0.81103	0.88511	1.2522	1.023	0.9316	1.0918	1.2594	4	4	5	4	1	2	5	6	5	6	5	6	4	4	5	4	1	2	5	6	5	6	5	6	61	61	61	0.969245	0.92354	0.96287	1.2522	1.04949
AHCY	Adenosylhomocysteinase	P23526	P23526		0.976339	1.0349	0.90916	0.96269	1.0027	1.1985	0.80139	0.77329	1.1814	1.2393	1.0932	1.0382	1.1684	10	8	9	14	12	9	11	9	14	14	15	8	10	8	9	14	12	9	11	9	14	14	15	8	45.1	45.1	45.1	1.1985	0.90916	0.96269	1.1684	1.31825
ABCF3	ATP-binding cassette sub-family F member 3	Q9NUQ8;Q9NUQ8-2	Q9NUQ8;Q9NUQ8-2		0.31592	NaN	NaN	1.1336	1.4723	0.90266	NaN	0.79096	NaN	0.66667	0.8986	NaN	NaN	1	1	2	2	2	1	2	1	3	3	1	1	1	1	2	2	2	1	2	1	3	3	1	1	11.6	11.6	11.6	0.784665	0.8986	0.96228	1.4723	0.873208
SERPINB1	Leukocyte elastase inhibitor	P30740;O75830;P50453	P30740		0.326058	NaN	1.1004	NaN	NaN	0.65527	NaN	0.89797	NaN	1.0081	1.0019	1.0228	NaN	0	2	0	0	2	0	2	1	2	3	2	0	0	2	0	0	1	0	1	1	2	2	1	0	10.8	10.8	8.2	0.831685	1.05115	0.960385	NaN	0.791214
DNM1L	Dynamin-1-like protein	O00429-6;O00429;O00429-2;O00429-3;O00429-5;O00429-4	O00429-6;O00429;O00429-2;O00429-3;O00429-5;O00429-4	+	1.68861	0.94946	0.84862	0.96031	1.0942	0.98305	0.85042	0.88432	1.123	1.0681	0.98752	1.0218	1.3301	10	8	10	15	12	8	12	12	15	16	16	3	10	8	10	15	12	8	12	12	15	16	16	3	50.6	50.6	50.6	0.98305	0.85042	0.96031	1.123	1.15596
TNPO3	Transportin-3	Q9Y5L0;Q9Y5L0-3;Q9Y5L0-1	Q9Y5L0;Q9Y5L0-3;Q9Y5L0-1		0.395653	0.69998	0.94514	0.95989	1.0857	0.9972	0.75922	0.87059	1.2172	1.1695	1.0121	1.0205	1.0324	2	8	3	7	4	5	5	4	10	8	7	2	2	8	3	7	4	5	5	4	10	8	7	2	24.2	24.2	24.2	0.9972	0.94514	0.95989	1.0857	1.05508
GDI2	Rab GDP dissociation inhibitor beta	P50395;P50395-2	P50395;P50395-2		0.634835	0.83855	0.92137	0.95986	1.0668	0.98736	0.77689	0.81961	1.133	1.0683	1.0607	1.0411	1.1132	6	11	5	11	9	8	11	6	13	13	17	3	4	8	4	9	6	5	7	4	7	7	11	2	60.4	60.4	41.1	0.98736	0.92137	0.95986	1.1132	1.07162
STAT5B;STAT5A	Signal transducer and activator of transcription 5B;Signal transducer and activator of transcription 5A	P51692;P42229	P51692;P42229		0.532961	NaN	NaN	NaN	1.3332	0.80234	NaN	0.821	1.4463	1.0195	1.073	1.0971	0.95206	1	1	1	4	4	1	5	3	4	6	9	2	1	1	1	4	4	1	5	3	4	6	9	2	18.2	18.2	18.2	0.91092	1.073	0.95905	1.3332	0.848947
PKM2	Pyruvate kinase isozymes M1/M2	P14618;P14618-3;P30613;P30613-2	P14618;P14618-3		0.737063	1.0019	0.93883	0.95779	1.0077	1.1627	0.84166	0.85053	1.1633	1.2212	1.0827	1.0833	1.1362	31	32	33	32	34	32	35	31	34	33	32	30	4	4	4	4	4	4	4	4	4	4	4	4	75.1	75.1	9.4	1.1627	0.93883	0.95779	1.1362	1.23846
HSP90B1	Endoplasmin	P14625;Q58FF3	P14625		0.603622	1.0672	1.0444	0.9544	1.0454	1.0819	0.93223	0.94358	1.2227	1.3002	1.1512	1.0761	1.1522	6	8	13	12	16	9	11	6	10	12	16	13	6	8	13	12	16	9	11	6	10	12	16	13	33.6	31.9	31.9	1.0819	1.0444	0.9544	1.1522	1.03591
TUBB6	Tubulin beta-6 chain	Q9BUF5	Q9BUF5		0.554407	0.95283	0.91495	0.95399	0.97629	1.1126	0.90797	0.78682	1.2289	1.1825	1.0644	1.0436	1.0753	4	4	4	6	6	5	6	2	7	7	7	4	2	2	2	4	4	3	4	0	5	5	5	2	58.1	39.2	34.5	1.1126	0.91495	0.95399	1.0753	1.21602
BCAT1	Branched-chain-amino-acid aminotransferase, cytosolic	P54687;P54687-4;P54687-3;P54687-2	P54687;P54687-4;P54687-3;P54687-2	+	1.36299	0.76918	0.82723	0.95368	1.0103	0.9015	0.73974	0.78385	1.1645	0.95442	0.97958	0.96028	1.1843	2	5	5	8	7	6	6	5	4	6	7	5	2	5	5	8	7	6	6	5	4	6	7	5	30.8	30.8	30.8	0.9015	0.82723	0.95368	1.1645	1.08978
NPM1	Nucleophosmin	P06748;P06748-2;P06748-3	P06748;P06748-2;P06748-3	+	1.85857	1.3126	1.0719	0.95343	0.87951	1.2877	0.89613	0.86051	0.90074	1.5104	1.2391	1.1617	0.96851	7	6	9	9	7	6	7	6	7	8	7	8	7	6	9	9	7	6	7	6	7	8	7	8	40.8	40.8	40.8	1.3126	1.0719	0.95343	0.90074	1.22455
SERPINB6	Serpin B6	P35237	P35237	+	1.47519	NaN	NaN	NaN	NaN	1.2396	NaN	0.92803	1.2792	1.1607	1.0701	0.97716	NaN	1	2	1	1	3	1	4	2	4	5	3	1	1	2	0	1	3	1	4	2	4	4	3	1	30.3	30.3	28.2	1.20015	1.0701	0.952595	1.2792	1.12153
PTPN11	Tyrosine-protein phosphatase non-receptor type 11	Q06124;Q06124-2;Q06124-3	Q06124;Q06124-2;Q06124-3		0.227749	NaN	0.95503	1.0189	1.1882	1.0471	1.0825	0.86159	0.54401	1.2125	1.0859	0.94816	NaN	0	3	4	6	6	2	3	2	9	9	9	0	0	3	4	6	6	2	3	2	9	9	9	0	32.5	32.5	32.5	1.1298	1.0825	0.94816	0.866105	1.0437
OXCT1	Succinyl-CoA:3-ketoacid-coenzyme A transferase 1, mitochondrial	P55809;Q9BYC2	P55809		0.510214	NaN	1.1596	0.85532	1.1438	1.1412	0.74143	0.94806	NaN	1.2782	1.0571	1.1029	NaN	1	2	2	3	2	2	3	1	4	4	7	0	1	2	2	3	2	2	3	1	4	4	7	0	28.1	28.1	28.1	1.2097	1.0571	0.94806	1.1438	1.14436
USP15	Ubiquitin carboxyl-terminal hydrolase 15	Q9Y4E8;Q9Y4E8-3;Q9Y4E8-2;Q13107;Q13107-2;P51784	Q9Y4E8;Q9Y4E8-3;Q9Y4E8-2	+	2.16493	0.72782	0.83687	0.94801	1.0681	0.83528	0.74151	0.87807	1.1432	0.86341	0.93729	1.0002	1.0389	4	10	6	12	9	5	8	5	15	15	14	3	4	10	6	12	9	5	8	5	15	15	14	3	31.5	31.5	31.5	0.83528	0.83687	0.94801	1.0681	0.9981
LARS	Leucine--tRNA ligase, cytoplasmic	Q9P2J5	Q9P2J5	+	2.87168	0.95154	0.84373	0.98585	1.2024	0.9868	0.82567	0.77264	1.5445	0.94247	0.95584	0.94721	1.4309	3	8	9	9	10	7	7	5	13	12	13	4	3	8	9	9	10	7	7	5	13	12	13	4	22.4	22.4	22.4	0.95154	0.84373	0.94721	1.4309	1.12778
USP10	Ubiquitin carboxyl-terminal hydrolase 10	Q14694-2;Q14694;Q14694-3	Q14694-2;Q14694;Q14694-3	+	1.70163	0.97611	0.82421	0.96842	1.1332	0.99647	0.79793	0.7905	1.335	1.0515	1.005	0.94488	1.7497	6	10	10	14	7	10	11	9	10	13	11	3	6	10	10	14	7	10	11	9	10	13	11	3	35.2	35.2	35.2	0.99647	0.82421	0.94488	1.335	1.209
RPL6	60S ribosomal protein L6	Q02878	Q02878		0.467533	NaN	0.92195	0.94442	0.97768	1.0317	0.8844	0.9282	1.2806	1.2127	1.0451	0.96711	0.9402	1	3	5	3	4	1	5	3	5	5	5	3	1	3	5	3	4	1	5	3	5	5	5	3	30.2	30.2	30.2	1.1222	0.92195	0.94442	0.97768	1.2172
CLTC	Clathrin heavy chain 1	Q00610;Q00610-2;P53675;P53675-2	Q00610;Q00610-2		1.02056	1.0426	0.96623	0.94327	1.1162	1.1806	0.91702	0.90301	1.3205	1.2639	1.205	1.0978	1.3093	6	19	18	24	31	16	23	13	27	28	29	5	6	19	18	24	31	16	23	13	27	28	29	5	41.7	41.7	41.7	1.1806	0.96623	0.94327	1.3093	1.22186
NMT1	Glycylpeptide N-tetradecanoyltransferase 1	P30419;P30419-2;O60551	P30419;P30419-2		1.10958	0.87426	0.79602	0.94115	1.0624	1.0281	0.87855	0.79451	1.173	1.1571	0.97152	1.0567	1.2358	2	4	3	4	4	5	5	3	2	5	6	2	2	4	3	4	4	5	5	3	2	5	6	2	21.8	21.8	21.8	1.0281	0.87855	0.94115	1.173	1.17022
FAM98B	Protein FAM98B	Q52LJ0	Q52LJ0		0.19905	NaN	0.83851	0.9669	0.90574	0.90726	0.67623	0.73031	NaN	1.0341	1.0147	0.94097	NaN	0	3	3	6	6	5	4	1	6	5	8	1	0	2	2	6	5	5	3	1	5	4	7	1	40.9	40.9	36.7	0.97068	0.83851	0.94097	0.90574	1.15762
LUC7L2	Putative RNA-binding protein Luc7-like 2	Q9Y383;Q9Y383-2;Q9NQ29;Q9NQ29-3;Q9NQ29-2	Q9Y383;Q9Y383-2		0.24298	NaN	0.88713	NaN	0.88299	NaN	0.73267	0.8161	NaN	1.0319	0.96108	1.0657	NaN	1	2	1	3	1	3	3	1	4	4	3	1	1	2	1	3	1	3	3	1	4	4	3	1	27.8	27.8	27.8	1.0319	0.88713	0.9409	0.88299	1.16319
TLN1	Talin-1	Q9Y490	Q9Y490		0.897495	1.0239	0.82286	0.93802	0.9799	1.1406	0.79143	0.73188	1.0142	1.1569	1.0037	1.0391	NaN	6	18	8	15	15	11	13	8	14	19	17	1	6	17	6	12	11	10	11	8	12	17	15	1	30.3	30.3	28	1.1406	0.82286	0.93802	0.99705	1.38614
HSPBP1	Hsp70-binding protein 1	Q9NZL4;Q9NZL4-2	Q9NZL4;Q9NZL4-2		0.680721	0.8123	0.77116	0.9374	1.0699	0.84063	0.75772	0.7927	1.1401	1.0215	1.0319	1.007	NaN	4	6	4	5	5	4	4	3	4	6	5	1	4	6	4	5	5	4	4	3	4	6	5	1	37	37	37	0.84063	0.77116	0.9374	1.105	1.09009
GSTO1	Glutathione S-transferase omega-1	P78417	P78417		0.758537	1.0097	0.82561	0.93585	1.0436	1.1412	0.89243	0.85618	1.219	1.2864	1.1659	0.99825	1.078	3	4	3	6	4	4	5	5	5	5	3	4	3	4	3	6	4	4	5	5	5	5	3	4	43.2	43.2	43.2	1.1412	0.89243	0.93585	1.078	1.27876
PPP2R1A	Serine/threonine-protein phosphatase 2A 65 kDa regulatory subunit A alpha isoform	P30153;P30154-2;P30154;P30154-3	P30153		0.285044	0.94106	0.85314	0.93583	0.936	1.0441	0.82226	0.81184	1.0832	1.1664	1.0616	1.1165	1.0584	8	15	13	20	16	13	19	12	23	19	20	12	8	15	13	20	16	13	19	12	23	19	20	12	62.6	62.6	62.6	1.0441	0.85314	0.93583	1.0584	1.22383
RAN	GTP-binding nuclear protein Ran	P62826	P62826		0.756102	1.0053	0.87023	0.93548	0.95145	1.0805	0.88101	0.86288	1.1713	1.1577	1.0211	1.0877	1.1756	9	6	6	6	7	6	6	5	6	5	5	6	9	6	6	6	7	6	6	5	6	5	5	6	47.7	47.7	47.7	1.0805	0.88101	0.93548	1.1713	1.22643
BOLA2	BolA-like protein 2	Q9H3K6;Q9H3K6-2	Q9H3K6;Q9H3K6-2		0.792593	0.97519	0.9035	1.0046	1.0312	1.0421	0.78281	0.86292	1.358	1.1681	1.0074	NaN	1.0699	4	5	5	2	4	6	4	5	4	3	1	2	4	5	5	2	4	6	4	5	4	3	1	2	80.2	80.2	80.2	1.0421	0.9035	0.93376	1.0699	1.1534
IREB2	Iron-responsive element-binding protein 2	P48200	P48200		0.245788	NaN	0.70844	NaN	1.0849	0.61425	NaN	NaN	NaN	0.74337	0.73913	0.93256	NaN	1	3	1	3	4	2	1	1	7	5	5	1	1	3	1	3	4	2	1	1	7	5	5	1	19	19	19	0.67881	0.723785	0.93256	1.0849	0.937861
VBP1	Prefoldin subunit 3	P61758	P61758		1.29068	0.77583	0.69899	0.92985	1.086	1.0028	0.8202	0.8551	1.34	1.2999	0.91269	1.0276	1.4193	2	3	4	5	5	5	5	4	5	5	4	2	2	3	4	5	5	5	5	4	5	5	4	2	45.2	45.2	45.2	1.0028	0.8202	0.92985	1.34	1.22263
YWHAB	14-3-3 protein beta/alpha;14-3-3 protein beta/alpha, N-terminally processed	P31946;P31946-2	P31946;P31946-2		0.0514281	NaN	0.83339	1.0407	NaN	1.0968	NaN	0.7569	0.95476	0.82284	0.94949	0.92735	NaN	1	2	2	1	2	0	2	3	3	2	3	1	1	2	2	1	2	0	2	3	3	2	3	1	34.6	17.1	17.1	0.95982	0.89144	0.92735	0.95476	1.07671
CSE1L	Exportin-2	P55060;P55060-3;P55060-2	P55060;P55060-3		0.627278	0.94043	0.85858	0.92716	0.96163	1.1429	0.77149	0.7951	1.0611	1.188	1.0536	1.0369	1.0109	11	17	15	25	18	17	25	13	23	27	26	9	11	17	15	25	18	17	25	13	23	27	26	9	47.9	47.9	47.9	1.1429	0.85858	0.92716	1.0109	1.33115
TUBA4A	Tubulin alpha-4A chain	P68366	P68366	+	2.20216	0.77311	0.74537	0.92579	1.0332	0.84742	0.72732	0.82073	1.2332	0.90465	0.88972	1.0359	1.2854	4	4	3	4	4	4	4	4	4	3	4	4	4	4	3	4	4	4	4	4	4	3	4	4	60	12.1	12.1	0.84742	0.74537	0.92579	1.2332	1.13691
PXN	Paxillin	P49023-3;P49023;P49023-2;P49023-4	P49023-3;P49023;P49023-2;P49023-4		0.649061	NaN	0.76227	NaN	1.1489	NaN	NaN	0.93125	NaN	0.74538	0.88115	0.91974	NaN	0	2	1	2	1	0	3	0	2	3	4	0	0	2	1	2	1	0	3	0	2	3	4	0	15.7	15.7	15.7	0.74538	0.82171	0.925495	1.1489	0.907108
CTNNA1	Catenin alpha-1	P35221-2;P35221;Q9UI47;P26232-6;P26232-4	P35221-2;P35221		0.233657	NaN	0.87828	0.92514	1.0214	NaN	NaN	0.85945	NaN	1.2815	0.99468	0.92895	NaN	1	3	3	4	1	1	3	0	6	6	3	1	1	3	2	3	1	0	2	0	6	5	2	1	20.2	20.2	17.8	1.2815	0.93648	0.92514	1.0214	1.36842
PGM3	Phosphoacetylglucosamine mutase	O95394	O95394		0.227658	1.0974	0.94037	NaN	1.0569	1.0911	0.84194	0.72786	1.1267	1.0129	1.1315	1.1156	NaN	2	3	1	2	4	2	4	2	2	4	4	1	2	3	1	2	4	2	4	2	2	4	4	1	22.7	22.7	22.7	1.0911	0.94037	0.92173	1.0918	1.16029
DDX3X;DDX3Y	ATP-dependent RNA helicase DDX3X;ATP-dependent RNA helicase DDX3Y	O00571;O00571-2;O15523;Q9NQI0;Q9NQI0-2	O00571;O00571-2;O15523	+	1.35916	0.89875	0.85605	0.92006	0.99871	0.99829	0.767	0.8137	1.1839	1.0866	0.95634	0.98617	1.1768	10	18	20	21	16	18	17	19	17	18	19	13	10	17	19	20	15	17	16	18	16	17	18	13	60.3	60.3	58.6	0.99829	0.85605	0.92006	1.1768	1.16616
COPG1	Coatomer subunit gamma-1	Q9Y678;Q9UBF2	Q9Y678		0.447666	NaN	0.9161	0.8444	1.0549	1.0358	0.61583	0.91957	1.1833	1.262	1.1168	1.0732	NaN	2	6	3	8	11	3	7	5	9	9	9	0	2	6	3	8	11	3	7	5	9	9	9	0	23	23	23	1.1489	0.9161	0.91957	1.1191	1.25412
PSMG1	Proteasome assembly chaperone 1	O95456;O95456-2	O95456;O95456-2		1.10218	0.7138	0.80883	0.98361	0.99977	0.91408	0.75366	0.78045	1.1749	0.92161	1.0039	0.91829	1.1165	2	4	5	3	6	2	3	3	5	3	6	2	2	4	5	3	6	2	3	3	5	3	6	2	44.1	44.1	44.1	0.91408	0.80883	0.91829	1.1165	1.13013
DEK	Protein DEK	P35659;P35659-2	P35659;P35659-2		0.817716	NaN	0.84763	0.91678	1.0273	1.0161	0.80989	0.81363	1.117	1.1248	0.97464	1.0623	NaN	1	5	2	5	5	3	6	7	5	6	7	1	1	5	2	5	5	3	6	7	5	6	7	1	37.6	37.6	37.6	1.07045	0.84763	0.91678	1.07215	1.26287
TTC1	Tetratricopeptide repeat protein 1	Q99614	Q99614	+	2.8581	0.94547	0.97008	0.91267	1.3175	1.0367	0.76437	0.89313	1.4458	1.0068	0.96162	1.0779	1.2759	4	5	8	5	6	8	5	8	4	3	5	4	4	5	8	5	6	8	5	8	4	3	5	4	43.2	43.2	43.2	1.0068	0.96162	0.91267	1.3175	1.04698
KLC1	Kinesin light chain 1	Q07866-4;Q07866-6;Q07866-7;Q07866-9;Q07866-5;Q07866;Q07866-3;Q07866-2;Q07866-8;Q6P597-3;Q6P597;Q6P597-2	Q07866-4;Q07866-6;Q07866-7;Q07866-9;Q07866-5;Q07866;Q07866-3;Q07866-2;Q07866-8	+	1.94681	0.85217	0.80186	0.9114	1.0616	0.92249	0.78288	0.83995	1.2451	0.93822	0.99392	1.0081	1.197	7	10	8	9	11	8	8	6	11	13	10	4	5	6	4	6	6	3	5	4	6	7	5	3	35.5	35.5	20.9	0.92249	0.80186	0.9114	1.197	1.15044
PRDX6	Peroxiredoxin-6	P30041	P30041		0.841433	0.93503	0.87576	0.91021	0.98237	1.08	0.78836	0.80322	1.0872	1.1582	1.0167	1.0012	1.0662	10	9	9	11	9	13	12	10	11	11	12	8	10	9	9	11	9	13	12	10	11	11	12	8	74.6	74.6	74.6	1.08	0.87576	0.91021	1.0662	1.23321
PRDX3	Thioredoxin-dependent peroxide reductase, mitochondrial	P30048	P30048		0.82614	0.94005	0.91575	0.90957	0.95	1.2331	0.98106	0.69395	1.2107	1.2589	1.1618	0.95765	1.2976	3	4	3	3	3	3	4	4	3	4	4	2	3	4	3	3	3	3	4	4	3	4	4	2	29.7	29.7	29.7	1.2331	0.98106	0.90957	1.2107	1.25691
FLNA	Filamin-A	P21333;P21333-2	P21333;P21333-2	+	1.37677	1.0023	0.85937	0.90922	1.0096	1.104	0.82284	0.78975	1.1375	1.2003	1.0245	0.98593	1.1416	84	104	100	104	104	95	98	93	93	94	100	79	77	95	93	95	96	87	89	84	86	86	92	71	64	64	59.7	1.104	0.85937	0.90922	1.1375	1.28466
ATIC	Bifunctional purine biosynthesis protein PURH;Phosphoribosylaminoimidazolecarboxamide formyltransferase;IMP cyclohydrolase	P31939	P31939		0.94753	NaN	0.72732	0.90894	0.95501	1.059	0.72519	0.91877	1.4236	1.1013	0.97626	0.88522	1.0513	1	3	5	7	5	5	6	3	8	11	8	2	1	3	5	7	5	5	6	3	8	11	8	2	39.4	39.4	39.4	1.08015	0.72732	0.90894	1.0513	1.48511
CARM1	Histone-arginine methyltransferase CARM1	Q86X55;Q86X55-1;Q86X55-2	Q86X55;Q86X55-1;Q86X55-2		0.755902	NaN	0.7396	0.90889	0.94723	0.97828	0.69084	0.72622	0.92467	1.0756	0.98156	0.92674	1.0793	1	6	7	8	5	4	6	5	3	6	7	2	1	6	7	8	5	4	6	5	3	6	7	2	25	25	25	1.02694	0.7396	0.90889	0.94723	1.38851
HDLBP	Vigilin	Q00341	Q00341	+	1.58219	NaN	1.0918	0.90702	0.93441	1.4195	0.92959	0.8287	NaN	1.222	1.0637	1.0443	NaN	0	5	6	11	5	2	6	1	10	12	7	1	0	5	6	11	5	2	6	1	10	12	7	1	24.8	24.8	24.8	1.32075	1.0637	0.90702	0.93441	1.24166
PPP1CB	Serine/threonine-protein phosphatase PP1-beta catalytic subunit	P62140	P62140	+	2.02998	0.95036	0.86773	0.90636	1.0719	1.033	0.85102	0.8272	1.1676	0.98422	1.0227	0.96139	1.1747	3	7	4	8	6	6	5	6	9	7	9	5	2	3	2	3	2	3	1	2	3	2	2	2	59.6	59.6	26.3	0.98422	0.86773	0.90636	1.1676	1.13425
XPO5	Exportin-5	Q9HAV4	Q9HAV4	+	2.71956	0.75401	0.83152	0.90633	1.1245	0.82889	0.81817	0.8034	1.4176	0.83394	0.97792	0.97941	1.2524	8	19	14	20	15	13	14	3	18	19	17	3	8	19	14	20	15	13	14	3	18	19	17	3	32.7	32.7	32.7	0.82889	0.83152	0.90633	1.2524	0.996837
MYL6	Myosin light polypeptide 6	P60660;P60660-2;P14649	P60660;P60660-2	+	2.11144	0.90656	0.7906	0.90447	1.0966	0.95584	0.74809	0.78434	1.34	1.0796	0.96497	0.96551	1.2564	6	8	6	7	7	7	7	8	8	7	6	5	6	8	6	7	7	7	7	8	8	7	6	5	55.6	55.6	55.6	0.95584	0.7906	0.90447	1.2564	1.20901
KIAA0664	Protein KIAA0664	O75153	O75153		1.183	0.79186	0.87433	0.90095	0.97234	0.86882	0.69118	0.8224	1.2759	0.9901	0.88088	1.0198	1.0931	2	4	3	4	5	2	5	5	6	8	10	3	2	3	2	3	5	1	4	4	6	8	9	2	17.9	17.9	17.3	0.86882	0.87433	0.90095	1.0931	0.993698
FLII	Protein flightless-1 homolog	Q13045;Q13045-2	Q13045;Q13045-2		0.92666	NaN	0.80452	0.90036	1.0199	0.89185	0.77569	0.86979	1.3065	1.1892	0.96977	1.1244	1.2359	1	5	4	10	6	3	3	3	8	7	7	2	1	5	4	10	6	3	3	3	8	7	7	2	17	17	17	1.04052	0.80452	0.90036	1.2359	1.29335
PSMA4	Proteasome subunit alpha type-4	P25789;P25789-2	P25789;P25789-2		0.933156	0.91471	0.71129	0.81673	0.94145	0.83559	0.82376	0.9003	1.0884	1.0839	0.93823	0.93699	1.1333	3	3	2	3	3	3	4	4	3	2	3	3	3	3	2	3	3	3	4	4	3	2	3	3	13.4	13.4	13.4	0.91471	0.82376	0.9003	1.0884	1.11041
SQSTM1	Sequestosome-1	Q13501;Q13501-2	Q13501;Q13501-2	+	4.87013	0.5138	0.60012	0.95887	1.4645	0.53814	0.62064	0.67664	1.5772	0.59103	0.83145	0.89866	1.5335	9	10	12	9	13	5	9	6	8	7	11	3	9	10	12	9	13	5	9	6	8	7	11	3	69.1	69.1	69.1	0.53814	0.62064	0.89866	1.5335	0.867073
STAT1	Signal transducer and activator of transcription 1-alpha/beta	P42224;P42224-2	P42224;P42224-2		0.515644	NaN	0.86826	0.89847	1.0229	1.0312	1.0267	0.66465	0.85115	1.2126	0.92228	1.0222	NaN	0	3	6	8	5	2	5	2	5	8	6	0	0	3	6	8	5	2	5	2	5	8	6	0	27.6	27.6	27.6	1.1219	0.92228	0.89847	0.937025	1.21644
FAM129B	Niban-like protein 1	Q96TA1;Q96TA1-2	Q96TA1;Q96TA1-2		1.17169	1.0853	0.87706	0.89818	0.97619	0.97221	0.9253	0.8589	1.1463	1.0979	1.0168	0.98899	1.2117	2	3	6	6	7	2	5	5	10	10	8	2	2	3	6	6	7	2	5	5	10	10	8	2	28.8	28.8	28.8	1.0853	0.9253	0.89818	1.1463	1.17292
LARP1	La-related protein 1	Q6PKG0;Q6PKG0-3;Q659C4;Q659C4-2;Q659C4-5;Q659C4-9;Q659C4-6;Q659C4-7	Q6PKG0;Q6PKG0-3		0.644329	0.80155	0.94334	0.89756	0.97199	1.0424	0.74594	0.72751	1.1906	1.0701	0.96583	1.0129	1.131	4	8	9	15	12	11	8	8	16	15	12	8	4	8	9	15	12	11	8	8	16	15	12	8	32.4	32.4	32.4	1.0424	0.94334	0.89756	1.131	1.10501
XRCC6	X-ray repair cross-complementing protein 6	P12956;P51449;P51449-2	P12956		1.07956	1.0352	0.92453	0.89633	0.99192	1.1685	0.80297	0.80183	1.1188	1.2232	1.0632	1.0444	1.1307	6	13	14	14	12	9	14	11	12	17	15	10	6	13	14	14	12	9	14	11	12	17	15	10	47	47	47	1.1685	0.92453	0.89633	1.1188	1.26389
HSPD1	60 kDa heat shock protein, mitochondrial	P10809	P10809	+	2.06121	0.64045	0.88824	0.89414	0.9676	0.75156	0.81056	0.81296	1.0691	0.79399	0.97616	0.95335	1.0083	15	15	14	17	14	13	15	15	17	16	17	12	15	15	14	17	14	13	15	15	17	16	17	12	57.4	57.4	57.4	0.75156	0.88824	0.89414	1.0083	0.846123
VCL	Vinculin	P18206;P18206-2;P18206-3	P18206;P18206-2		0.719179	0.91952	0.78623	1.0346	0.95726	1.0389	0.79495	0.70998	1.0253	1.0599	0.95296	0.89186	1.0396	2	2	4	4	2	3	7	3	12	13	14	6	2	2	4	4	2	3	7	3	12	13	14	6	25.3	25.3	25.3	1.0389	0.79495	0.89186	1.0253	1.30687
CAPRIN1	Caprin-1	Q14444;Q14444-2	Q14444;Q14444-2	+	1.61979	1.0508	0.83536	0.94758	0.95154	0.95887	0.80546	0.76661	1.2429	1.113	0.88928	0.89125	1.1665	5	7	6	8	6	6	9	5	8	8	9	4	5	7	6	8	6	6	9	5	8	8	9	4	22.1	22.1	22.1	1.0508	0.83536	0.89125	1.1665	1.2579
GSPT1;GSPT2	Eukaryotic peptide chain release factor GTP-binding subunit ERF3A;Eukaryotic peptide chain release factor GTP-binding subunit ERF3B	P15170-2;P15170;Q8IYD1	P15170-2;P15170;Q8IYD1		1.18081	0.79957	0.76356	0.89117	0.93726	0.88353	0.68219	0.69784	1.066	0.96685	0.88498	0.9082	1.0566	15	17	19	21	22	19	19	15	20	16	19	16	15	17	19	21	22	19	19	15	20	16	19	16	47.6	47.6	47.6	0.88353	0.76356	0.89117	1.0566	1.15712
SFN	14-3-3 protein sigma	P31947;P31947-2	P31947;P31947-2		0.756331	NaN	0.83683	0.89081	0.82365	1.038	0.81955	0.72041	0.91827	1.1091	0.90687	0.94502	1.1266	1	3	3	4	3	2	3	2	6	5	3	2	1	3	3	4	3	2	3	2	6	5	3	2	31.9	24.6	24.6	1.07355	0.83683	0.89081	0.91827	1.28288
UBA1	Ubiquitin-like modifier-activating enzyme 1	P22314	P22314	+	1.88061	1.1538	0.84703	0.88989	0.98675	1.2708	0.81131	0.81491	1.1573	1.2688	1.0629	1.0258	1.1238	10	20	15	21	21	12	23	18	20	25	23	9	10	20	15	21	21	12	23	18	20	25	23	9	42.2	42.2	42.2	1.2688	0.84703	0.88989	1.1238	1.49794
CAP1	Adenylyl cyclase-associated protein 1	Q01518;Q01518-2;P40123	Q01518;Q01518-2	+	2.90324	NaN	NaN	0.87928	0.8752	1.2109	0.83555	0.88916	0.93796	1.2239	0.92255	0.95014	NaN	1	1	3	4	2	2	4	2	2	3	8	1	1	1	3	4	2	2	4	2	2	3	8	1	25.1	25.1	25.1	1.2174	0.87905	0.88916	0.90658	1.3849
DIS3	Exosome complex exonuclease RRP44	Q9Y2L1;Q9Y2L1-2	Q9Y2L1;Q9Y2L1-2		0.6875	NaN	1.0035	NaN	0.73891	0.98786	0.7871	0.83986	NaN	1.2946	0.87356	0.93838	NaN	0	3	2	3	3	2	3	0	6	6	4	0	0	3	2	3	3	2	3	0	6	6	4	0	14.7	14.7	14.7	1.14123	0.87356	0.88912	0.73891	1.30641
BUB1B	Mitotic checkpoint serine/threonine-protein kinase BUB1 beta	O60566-3;O60566;O60566-2	O60566-3;O60566;O60566-2	+	3.43221	0.64273	0.68946	0.88733	1.2451	0.67827	0.6501	0.71569	1.4894	0.79992	0.85227	0.97344	1.5949	6	12	9	14	16	13	10	8	19	14	12	5	6	12	9	14	16	13	10	8	19	14	12	5	32.7	32.7	32.7	0.67827	0.68946	0.88733	1.4894	0.98377
KHDRBS1	KH domain-containing, RNA-binding, signal transduction-associated protein 1	Q07666;Q07666-2;Q07666-3;Q5VWX1;O75525;O75525-2	Q07666;Q07666-2;Q07666-3	+	3.10193	1.2306	0.8776	0.88694	1.0908	1.3068	0.794	0.78403	1.1415	1.3996	1.0026	0.98527	1.1797	8	8	7	9	8	7	9	8	8	8	7	6	8	8	7	9	8	7	9	8	8	8	7	6	27.8	27.8	27.8	1.3068	0.8776	0.88694	1.1415	1.48906
MGEA5	Bifunctional protein NCOAT;Protein O-GlcNAcase;Histone acetyltransferase	O60502;O60502-2;O60502-3	O60502;O60502-2;O60502-3		1.1553	NaN	0.77397	0.88582	1.1399	0.82556	0.67912	0.65247	1.0716	0.77926	0.91048	0.9239	NaN	1	4	5	6	6	5	2	4	6	10	5	1	1	4	5	6	6	5	2	4	6	10	5	1	22.9	22.9	22.9	0.80241	0.77397	0.88582	1.10575	1.03675
RAC1;RAC3	Ras-related C3 botulinum toxin substrate 1;Ras-related C3 botulinum toxin substrate 3	P63000-2;P63000;P60763;P15153	P63000-2;P63000;P60763		0.726519	0.86553	0.80865	0.83124	0.8143	1.1353	0.75582	0.88582	0.9972	1.1681	0.97356	0.89869	0.97571	3	4	4	4	3	2	2	3	5	7	4	4	3	3	4	3	2	2	2	2	4	6	4	3	34.1	34.1	28.9	1.1353	0.80865	0.88582	0.97571	1.40394
THUMPD1	THUMP domain-containing protein 1	Q9NXG2	Q9NXG2	+	2.95647	0.79452	NaN	NaN	1.2955	0.79563	0.77437	0.97771	1.4358	0.60038	0.83938	0.79304	1.297	2	0	1	3	4	3	2	2	1	2	2	2	2	0	1	3	4	3	2	2	1	2	2	2	34	34	34	0.79452	0.806875	0.885375	1.297	0.984688
IQGAP1	Ras GTPase-activating-like protein IQGAP1	P46940;Q86VI3	P46940		0.975663	0.96003	0.8857	0.88337	0.9612	1.0671	0.863	0.82204	1.0981	1.1542	1.0234	0.99028	1.1636	17	16	25	29	26	21	24	13	31	32	31	14	17	16	25	29	25	21	23	13	30	31	29	13	44	44	43	1.0671	0.8857	0.88337	1.0981	1.20481
EEF1B2	Elongation factor 1-beta	P24534	P24534		0.850578	0.9897	0.8781	0.88207	0.81612	0.96979	0.71896	0.68539	0.87474	0.99341	0.89064	0.8906	0.96387	3	3	2	3	3	3	2	2	4	4	4	3	3	3	2	3	3	3	2	2	4	4	4	3	24.4	24.4	24.4	0.9897	0.8781	0.88207	0.87474	1.12709
MYH9	Myosin-9	P35579;P35579-2;P35749-2;P35749;P35749-3;P35749-4;A7E2Y1;Q9UKX2;P11055;P12882;P13533;Q9Y623;Q9UKX3;P13535;P12883;REV__Q9UKV3;REV__Q9UKV3-5;REV__Q08AF3	P35579;P35579-2	+	2.0827	0.87779	0.79525	0.88082	1.0489	0.97909	0.74377	0.73786	1.2956	1.0567	0.9279	0.92031	1.2413	51	82	62	77	75	65	67	50	76	78	79	43	39	69	48	65	63	52	56	40	64	67	65	35	57.2	57.2	48.4	0.97909	0.79525	0.88082	1.2413	1.23117
2009-09-01	Septin-9	Q9UHD8;Q9UHD8-5;Q9UHD8-2;Q9UHD8-7;Q9UHD8-3;Q9UHD8-8;Q9UHD8-9;Q9UHD8-4	Q9UHD8;Q9UHD8-5;Q9UHD8-2;Q9UHD8-7;Q9UHD8-3;Q9UHD8-8;Q9UHD8-9;Q9UHD8-4	+	1.30435	0.89564	0.75434	0.88058	0.95436	0.97476	0.67308	0.74704	1.1861	1.0141	0.90778	0.95505	1.0293	3	9	7	6	6	5	6	6	7	8	7	2	3	9	7	6	6	5	6	6	7	8	7	2	21.2	21.2	21.2	0.97476	0.75434	0.88058	1.0293	1.2922
TUBB4A	Tubulin beta-4A chain	P04350	P04350		0.135742	NaN	0.87418	0.80154	0.89454	NaN	0.74109	0.87987	1.1846	1.2325	1.1968	1.0872	1.0199	1	2	2	2	1	2	2	3	3	3	3	2	1	1	1	1	1	1	0	1	1	1	1	1	59.9	9.7	3.8	1.2325	0.87418	0.87987	1.0199	1.40989
TUBB8	Tubulin beta-8 chain	Q3ZCM7	Q3ZCM7		0.866063	0.90775	0.85773	0.9286	0.94922	1.1122	0.86052	0.83018	1.051	1.1426	NaN	NaN	0.94307	2	2	2	2	2	2	1	2	2	1	1	2	2	2	2	2	2	2	1	2	2	1	1	2	24.5	7.4	7.4	1.1122	0.859125	0.87939	0.94922	1.29457
CDK4	Cyclin-dependent kinase 4	P11802;Q14004;Q9NYV4;Q9NYV4-2;Q14004-2;Q9NYV4-3;Q00537;Q00537-2;Q07002-3;P50750-2;Q07002-2;Q07002;O94921;O94921-2;Q96Q40;O94921-3;Q96Q40-3;Q96Q40-4;P50750;Q96Q40-2	P11802	+	1.9903	0.86452	0.71459	0.95971	0.97005	0.80853	NaN	0.79202	1.1255	0.72872	0.80244	0.8784	1.0791	2	5	2	3	2	1	4	3	5	5	3	2	2	5	2	3	2	1	4	3	5	5	3	2	38.6	36	36	0.80853	0.758515	0.8784	1.0791	1.06594
CAPZB	F-actin-capping protein subunit beta	P47756-2;P47756	P47756-2;P47756	+	1.55895	0.94044	0.83136	0.8775	0.98033	1.067	0.72508	0.75908	1.0421	1.1045	0.96088	0.89161	1.0869	6	10	14	12	11	10	6	9	10	9	9	11	6	10	14	12	11	10	6	9	10	9	9	11	72.8	72.8	72.8	1.067	0.83136	0.8775	1.0421	1.28344
YWHAE	14-3-3 protein epsilon	P62258;P62258-2	P62258;P62258-2		1.18839	1.0054	0.879	0.8773	0.89074	1.1152	0.81213	0.79176	1.0177	1.1586	1.0092	0.96997	1.0507	12	11	13	13	11	11	13	12	14	16	13	12	10	9	11	11	9	9	11	10	12	14	11	10	69.8	69.8	66.7	1.1152	0.879	0.8773	1.0177	1.26871
TTLL12	Tubulin--tyrosine ligase-like protein 12	Q14166	Q14166		0.756644	0.9449	0.77834	0.87715	0.95906	1.0348	0.73072	0.82677	1.0526	1.1999	1.0279	1.0282	1.0783	3	5	7	9	4	4	5	6	10	8	10	4	3	5	7	9	4	4	5	6	10	8	10	4	39.9	39.9	39.9	1.0348	0.77834	0.87715	1.0526	1.3295
AP2B1;AP1B1	AP-2 complex subunit beta;AP-1 complex subunit beta-1	P63010-2;P63010;Q10567;Q10567-2;Q10567-3	P63010-2;P63010;Q10567;Q10567-2;Q10567-3	+	1.64712	NaN	0.7239	0.87426	0.96083	1.0232	0.70748	0.6909	1.1035	1.2695	0.88685	0.92128	1.0849	0	6	6	5	4	3	7	3	4	8	8	3	0	6	6	5	4	3	7	3	4	8	8	3	22.1	22.1	22.1	1.14635	0.7239	0.87426	1.0849	1.58358
DDX17	Probable ATP-dependent RNA helicase DDX17	Q92841;Q92841-3;Q92841-2;Q92841-1	Q92841;Q92841-3;Q92841-2;Q92841-1		0.992753	0.97183	0.85706	0.87422	0.97716	1.0412	0.78691	0.74424	1.1313	1.1395	0.99425	1.0403	1.1737	13	17	21	19	17	17	17	20	24	21	24	16	8	11	15	13	11	10	12	14	17	15	17	11	42	40.5	30.2	1.0412	0.85706	0.87422	1.1313	1.21485
WDR77	Methylosome protein 50	Q9BQA1	Q9BQA1	+	1.48509	0.90644	0.77375	0.87417	0.90018	0.983	0.73532	0.75175	1.1876	0.91214	0.81233	0.90706	1.0104	4	3	5	4	4	5	5	4	6	6	6	4	4	3	5	4	4	5	5	4	6	6	6	4	43.9	43.9	43.9	0.91214	0.77375	0.87417	1.0104	1.17886
DDX1	ATP-dependent RNA helicase DDX1	Q92499	Q92499		0.96211	NaN	0.88545	0.87386	0.94798	0.95413	0.90777	0.79842	1.0531	1.1552	0.9664	0.954	1.0505	1	3	5	8	3	2	7	3	12	8	14	2	1	3	5	8	3	2	7	3	12	8	14	2	36.6	36.6	36.6	1.05466	0.90777	0.87386	1.0505	1.16182
PTGES3	Prostaglandin E synthase 3	Q15185	Q15185		1.11496	0.88597	0.75973	0.86973	0.89949	0.99325	0.73979	0.73246	1.0215	1.0676	0.92081	0.9018	1.0127	4	6	4	5	6	6	4	6	5	5	6	5	4	6	4	5	6	6	4	6	5	5	6	5	41.9	41.9	41.9	0.99325	0.75973	0.86973	1.0127	1.30737
EZR	Ezrin	P15311;P35241	P15311		1.10154	0.89617	0.65832	0.86857	0.77052	0.82502	0.66863	0.69221	0.92517	0.95576	0.77278	0.88239	0.90512	5	8	8	9	10	8	9	8	12	14	14	6	1	3	4	3	5	3	3	3	6	8	7	2	37.5	37.5	28.2	0.89617	0.66863	0.86857	0.90512	1.34031
UNC45A	Protein unc-45 homolog A	Q9H3U1-2;Q9H3U1;Q9H3U1-3	Q9H3U1-2;Q9H3U1	+	1.53436	NaN	0.73298	0.94992	0.96487	1.3006	0.83883	0.8199	1.135	1.4417	1.1234	0.86728	NaN	1	7	8	9	6	5	5	3	4	6	8	0	1	7	8	9	6	5	5	3	4	6	8	0	23.6	23.6	23.6	1.37115	0.83883	0.86728	1.04993	1.6346
SKP1	S-phase kinase-associated protein 1	P63208;P63208-2	P63208;P63208-2	+	2.18234	NaN	0.82826	0.87728	0.89454	1.1036	0.74564	0.69315	0.92436	1.0983	0.86501	0.86612	0.94775	1	3	2	4	2	3	3	2	4	5	5	2	1	3	2	4	2	3	3	2	4	5	5	2	60.7	60.7	60.7	1.10095	0.82826	0.86612	0.92436	1.32923
RCC2	Protein RCC2	Q9P258	Q9P258	+	1.45683	0.93062	0.81342	0.86058	0.98885	1.025	0.7495	0.84165	1.1836	1.0979	1.0089	0.91459	1.1843	10	16	14	15	12	14	14	16	19	18	18	12	10	16	14	15	12	14	14	16	19	18	18	12	56.9	56.9	56.9	1.025	0.81342	0.86058	1.1836	1.26011
SERPINB5	Serpin B5	P36952;P36952-2	P36952;P36952-2		0.13382	0.71856	0.54278	0.88316	NaN	NaN	NaN	0.486	0.79359	1.0086	0.84474	0.85824	NaN	2	3	2	1	1	1	2	2	4	4	5	0	2	3	2	1	1	1	2	2	4	4	5	0	32	32	32	0.86358	0.69376	0.85824	0.79359	1.24478
CCT6A	T-complex protein 1 subunit zeta	P40227	P40227	+	1.38098	0.7169	0.7429	0.85824	0.93995	0.83264	0.67943	0.76685	1.0042	0.90415	0.88153	0.89732	1.0577	10	12	12	12	12	7	15	9	15	18	15	12	8	8	9	8	7	6	11	5	10	13	11	8	50.5	50.5	42.9	0.83264	0.7429	0.85824	1.0042	1.1208
TRIP6	Thyroid receptor-interacting protein 6	Q15654	Q15654	+	2.91107	0.64399	0.70964	0.85751	1.1097	0.77718	0.68924	0.77329	1.2194	0.8217	0.88384	0.9626	1.2121	6	8	9	10	9	5	9	6	9	10	10	5	6	8	9	10	9	5	9	6	9	10	10	5	51.5	51.5	51.5	0.77718	0.70964	0.85751	1.2121	1.09518
TUBB	Tubulin beta chain	P07437	P07437	+	1.79742	0.99107	0.72157	0.85631	0.87128	1.1223	0.70535	0.73718	0.98457	1.2353	0.91073	0.91506	1.0055	5	5	5	5	5	5	5	5	5	5	5	5	4	4	4	4	4	4	4	4	4	4	4	4	61.5	19.4	16	1.1223	0.72157	0.85631	0.98457	1.55536
MDH2	Malate dehydrogenase, mitochondrial	P40926	P40926		1.21604	0.86705	0.73691	0.85587	0.86862	1.0222	0.72016	0.73778	1.0919	1.0822	0.88575	0.88203	1.0235	7	6	7	4	6	5	8	6	8	9	10	6	7	6	7	4	6	5	8	6	8	9	10	6	51.8	51.8	51.8	1.0222	0.73691	0.85587	1.0235	1.38714
ABCE1	ATP-binding cassette sub-family E member 1	P61221	P61221		0.630483	0.70786	0.69167	0.85368	0.91107	0.8061	0.70554	0.75265	1.1549	0.9423	0.98327	0.93931	0.9675	5	7	5	4	7	7	6	6	6	5	7	2	5	7	5	4	7	7	6	6	6	5	7	2	27.4	27.4	27.4	0.8061	0.70554	0.85368	0.9675	1.14253
CFL1	Cofilin-1	P23528;Q9Y281	P23528	+	2.50205	1.1366	0.83078	0.85001	0.87274	1.2537	0.77985	0.75601	1.0224	1.3674	0.98627	0.92193	0.99735	7	13	12	11	11	11	12	11	13	12	15	10	7	13	12	11	11	11	12	11	13	12	15	10	69.9	69.9	69.9	1.2537	0.83078	0.85001	0.99735	1.50906
ZNF207	Zinc finger protein 207	O43670;O43670-2;O43670-3	O43670;O43670-2;O43670-3		0.384854	NaN	NaN	NaN	0.91745	NaN	0.70021	0.81659	NaN	0.99587	0.8401	0.88268	NaN	1	1	1	2	1	2	3	1	2	2	3	1	1	1	1	2	1	2	3	1	2	2	3	1	9.6	9.6	9.6	0.99587	0.770155	0.849635	0.91745	1.29308
EIF3B	Eukaryotic translation initiation factor 3 subunit B	P55884-2;P55884	P55884-2;P55884	+	1.55241	0.93423	0.82735	0.8464	0.97854	0.98799	0.69476	0.80009	1.2644	1.0326	0.89766	0.93483	1.0537	11	5	13	13	12	12	11	9	18	19	18	7	11	5	13	13	12	12	11	9	18	19	18	7	35.5	35.5	35.5	0.98799	0.82735	0.8464	1.0537	1.19416
CCT8	T-complex protein 1 subunit theta	P50990	P50990	+	2.1378	0.77586	0.77041	0.84281	0.97219	0.85738	0.74223	0.79948	1.1044	0.88402	0.89268	0.91898	1.1507	17	21	19	24	25	20	22	19	23	22	24	21	17	21	19	24	25	20	22	19	23	22	24	21	61.9	61.9	61.9	0.85738	0.77041	0.84281	1.1044	1.11289
CCT3	T-complex protein 1 subunit gamma	P49368;P49368-2	P49368;P49368-2	+	1.78478	0.67775	0.73339	0.84264	0.95235	0.77185	0.67836	0.74696	1.1248	0.84625	0.8745	0.92429	1.0494	16	15	17	20	19	14	16	13	23	22	20	12	16	15	17	20	19	14	16	13	23	22	20	12	63.5	63.5	63.5	0.77185	0.73339	0.84264	1.0494	1.05244
ADSL	Adenylosuccinate lyase	P30566;P30566-2	P30566;P30566-2	+	1.99224	0.81616	0.79484	0.84105	0.94809	0.83621	0.72312	0.72887	1.0707	0.88189	0.87504	0.87548	1.0495	5	8	9	9	7	6	7	5	10	8	8	5	5	8	9	9	7	6	7	5	10	8	8	5	45	45	45	0.83621	0.79484	0.84105	1.0495	1.05205
SUGT1	Suppressor of G2 allele of SKP1 homolog	Q9Y2Z0;Q9Y2Z0-2	Q9Y2Z0;Q9Y2Z0-2	+	1.78656	1.1815	0.89457	0.8407	0.81718	1.1169	0.7163	0.81557	NaN	1.1213	0.99144	0.94306	NaN	3	3	3	5	2	3	5	0	7	5	4	1	3	3	3	5	2	3	5	0	7	5	4	1	34.5	34.5	34.5	1.1213	0.89457	0.8407	0.81718	1.25345
NUDCD1	NudC domain-containing protein 1	Q96RS6;Q96RS6-2;Q96RS6-3	Q96RS6;Q96RS6-2;Q96RS6-3		0.638445	0.79109	0.76549	0.84051	0.9582	0.83321	0.69166	0.80246	1.1024	1.0472	0.93201	0.9287	NaN	2	3	4	3	3	2	3	3	3	3	2	0	2	3	4	3	3	2	3	3	3	3	2	0	20.4	20.4	20.4	0.83321	0.76549	0.84051	1.0303	1.08847
TUBB4B	Tubulin beta-4B chain	P68371	P68371	+	1.55481	0.96834	0.76137	0.84	0.88642	1.1137	0.73506	0.74749	0.99328	1.1655	0.92347	0.95399	0.99591	20	20	21	21	20	20	21	22	17	18	21	19	1	1	1	1	1	1	1	1	1	1	1	1	65.2	65.2	2.7	1.1137	0.76137	0.84	0.99328	1.46276
CSRP1	Cysteine and glycine-rich protein 1	P21291	P21291		0.520861	0.72172	0.6506	0.69583	0.71523	0.83101	0.62516	NaN	0.868	0.88776	NaN	0.98285	0.8037	2	2	4	3	2	4	1	4	2	1	2	3	2	2	4	3	2	4	1	4	2	1	2	3	51.3	51.3	51.3	0.83101	0.63788	0.83934	0.8037	1.30277
ADRM1	Proteasomal ubiquitin receptor ADRM1	Q16186	Q16186		1.05797	0.54257	0.85358	NaN	NaN	0.50975	0.70097	0.74814	1.2689	0.71252	0.93449	0.93039	NaN	2	3	1	1	2	2	2	3	3	2	2	1	2	3	1	1	2	2	2	3	3	2	2	1	11.3	11.3	11.3	0.54257	0.85358	0.839265	1.2689	0.63564
TPM4	Tropomyosin alpha-4 chain	P67936;P67936-2	P67936;P67936-2	+	1.51694	1.036	0.75859	0.839	0.88712	1.0321	0.69263	0.61238	0.95392	1.0757	0.9087	0.89578	1.048	2	5	3	5	5	3	5	3	4	6	6	2	2	4	2	4	4	1	3	2	2	4	4	1	25.8	19.8	15.3	1.036	0.75859	0.839	0.95392	1.36569
PGK1	Phosphoglycerate kinase 1	P00558;P07205	P00558		0.778786	0.90511	0.83265	0.83883	0.90815	1.0131	0.7769	0.82439	1.1089	1.0798	0.98296	0.98315	1.0837	13	14	15	17	17	12	20	13	18	19	18	13	13	14	15	17	17	12	20	13	18	19	18	13	63.1	63.1	63.1	1.0131	0.83265	0.83883	1.0837	1.21672
ADSS	Adenylosuccinate synthetase isozyme 2	P30520	P30520	+	1.4576	0.95847	0.82158	0.83864	0.99314	0.99865	0.67281	0.78978	1.0081	0.99724	0.92117	0.96507	1.1375	2	3	4	7	4	4	5	3	5	5	6	2	2	3	4	7	4	4	5	3	5	5	6	2	27.9	27.9	27.9	0.99724	0.82158	0.83864	1.0081	1.21381
PARP1	Poly [ADP-ribose] polymerase 1	P09874	P09874		0.896974	0.93149	0.77805	0.83502	0.92559	1.0119	0.7425	0.76854	1.0045	1.1962	0.99644	0.95003	1.0938	4	6	12	11	9	7	9	2	14	16	17	12	4	6	12	11	9	7	9	2	14	16	17	12	32.3	32.3	32.3	1.0119	0.77805	0.83502	1.0045	1.30056
EIF4A1	Eukaryotic initiation factor 4A-I	P60842	P60842		1.22979	0.83916	0.76094	0.83249	0.9344	0.97636	0.73228	0.74626	1.1086	1.029	0.89872	0.95071	1.0621	14	17	16	19	16	14	20	15	16	20	16	13	6	9	8	10	8	8	12	8	10	12	9	6	62.6	62.6	37.2	0.97636	0.76094	0.83249	1.0621	1.2831
GMPS	GMP synthase [glutamine-hydrolyzing]	P49915	P49915		0.869309	0.8617	0.77187	0.82975	0.83832	0.99902	0.6715	0.69938	1.0336	1.047	0.90457	0.89363	0.95009	12	16	14	23	18	14	17	15	15	22	19	9	12	16	14	23	18	14	17	15	15	22	19	9	64.1	64.1	64.1	0.99902	0.77187	0.82975	0.95009	1.29429
CCT4	T-complex protein 1 subunit delta	P50991	P50991		0.85131	0.78696	0.73545	0.82876	0.87388	0.87299	0.70347	0.73791	1.0041	0.96925	0.87435	0.95159	1.0554	9	16	12	17	15	12	16	15	13	16	15	13	9	16	12	17	15	12	16	15	13	16	15	13	51.4	51.4	51.4	0.87299	0.73545	0.82876	1.0041	1.18701
TXLNA	Alpha-taxilin	P40222	P40222		0.0915217	NaN	NaN	0.74579	1.1318	0.77698	0.62208	NaN	NaN	0.98938	0.92325	0.90751	NaN	1	1	2	2	4	3	1	0	3	6	4	0	1	1	2	2	4	3	1	0	3	6	4	0	24.7	24.7	24.7	0.88318	0.772665	0.82665	1.1318	1.14303
CCT7	T-complex protein 1 subunit eta	Q99832;Q99832-3;Q99832-4;Q99832-2	Q99832;Q99832-3;Q99832-4;Q99832-2	+	1.99436	0.83651	0.83843	0.82586	1.0144	0.87434	0.76358	0.79461	1.1589	0.95653	0.9234	0.95878	1.2258	6	10	7	11	11	7	13	9	17	16	15	7	6	10	7	11	11	7	13	9	17	16	15	7	53	53	53	0.87434	0.83843	0.82586	1.1589	1.04283
DARS	Aspartate--tRNA ligase, cytoplasmic	P14868	P14868		0.0478315	NaN	NaN	NaN	0.94757	NaN	0.70681	0.69583	NaN	0.87109	0.8905	0.94771	NaN	0	1	0	3	1	3	4	0	4	5	5	1	0	1	0	3	1	3	4	0	4	5	5	1	32.5	32.5	32.5	0.87109	0.798655	0.82177	0.94757	1.0907
RPL10A	60S ribosomal protein L10a	P62906	P62906		1.04971	NaN	0.6981	NaN	0.62228	1.214	NaN	NaN	NaN	1.1815	0.98825	0.81955	0.81655	0	2	1	3	2	1	1	1	4	3	2	3	0	2	1	3	2	1	1	1	4	3	2	3	26.7	26.7	26.7	1.19775	0.843175	0.81955	0.719415	1.42052
RPL29	60S ribosomal protein L29	P47914	P47914		1.21067	NaN	NaN	0.75751	0.83838	1.0272	NaN	NaN	NaN	1.1414	NaN	0.88069	0.88192	1	1	2	2	2	1	1	1	2	1	2	2	1	1	2	2	2	1	1	1	2	1	2	2	14.5	14.5	14.5	1.0843	NaN	0.8191	0.86015	#VALUE!
CARS	Cysteine--tRNA ligase, cytoplasmic	P49589-3;P49589;P49589-2	P49589-3;P49589;P49589-2	+	1.81666	0.5717	0.81867	0.81895	0.93362	0.68825	0.67364	0.76261	1.0786	0.74834	0.92977	0.90491	1.004	8	12	8	9	12	9	11	7	17	15	16	5	8	12	8	9	12	9	11	7	17	15	16	5	39.6	39.6	39.6	0.68825	0.81867	0.81895	1.004	0.840693
UCK2	Uridine-cytidine kinase 2	Q9BZX2;Q9BZX2-2;Q9HA47	Q9BZX2		0.0977902	0.608	0.68407	NaN	0.49875	0.63731	NaN	0.6283	NaN	0.9209	0.72345	1.0092	NaN	3	2	1	3	2	1	3	0	3	3	2	1	3	2	1	3	2	1	3	0	3	3	2	1	24.1	24.1	24.1	0.63731	0.70376	0.81875	0.49875	0.905579
HSD17B10	3-hydroxyacyl-CoA dehydrogenase type-2	Q99714;Q99714-2	Q99714;Q99714-2	+	1.51083	0.80482	0.78148	0.81792	0.98641	0.98468	0.78479	0.74781	1.0614	0.98183	0.93623	0.89322	1.1084	7	11	10	12	9	9	11	8	10	11	10	7	7	11	10	12	9	9	11	8	10	11	10	7	73.2	73.2	73.2	0.98183	0.78479	0.81792	1.0614	1.25107
S100A6	Protein S100-A6	P06703	P06703		0.920872	NaN	0.7573	0.81656	0.80197	1.0431	0.54152	0.74609	0.86285	1.0635	0.92791	0.85692	NaN	1	1	3	2	2	2	2	2	2	3	2	1	1	1	3	2	2	2	2	2	2	3	2	1	66.7	66.7	66.7	1.0533	0.7573	0.81656	0.83241	1.39086
PRDX4	Peroxiredoxin-4	Q13162	Q13162	+	1.48624	0.87634	0.69544	0.83447	0.64941	1.1052	0.68641	0.67869	0.74405	1.1432	0.91225	0.81613	0.80341	3	7	3	6	6	7	7	6	8	8	5	5	3	7	3	6	6	7	7	6	8	8	5	5	64.2	59.8	59.8	1.1052	0.69544	0.81613	0.74405	1.58921
PUS7	Pseudouridylate synthase 7 homolog	Q96PZ0	Q96PZ0		1.09903	NaN	0.81909	0.81549	0.91251	0.78989	0.69562	0.66963	0.99523	0.87835	0.85137	0.8922	1.1391	0	6	6	8	7	3	12	3	9	13	11	3	0	6	6	8	7	3	12	3	9	13	11	3	42.8	42.8	42.8	0.83412	0.81909	0.81549	0.99523	1.01835
DNAJC7	DnaJ homolog subfamily C member 7	Q99615;Q99615-2	Q99615;Q99615-2		0.615355	NaN	NaN	NaN	1.0455	0.96535	NaN	0.71875	NaN	0.98359	1.0129	0.91186	NaN	0	1	0	4	4	1	3	1	3	4	4	1	0	1	0	4	4	1	3	1	3	4	4	1	23.5	23.5	23.5	0.97447	1.0129	0.815305	1.0455	0.962059
ACTN4	Alpha-actinin-4	O43707;Q08043	O43707	+	1.76839	0.91542	0.75264	0.81283	0.89708	1.0063	0.73259	0.72547	1.057	1.0774	0.88232	0.87099	1.0327	37	40	40	43	41	39	43	36	40	42	39	32	21	26	26	26	25	24	26	23	24	24	23	20	70.9	70.9	48.2	1.0063	0.75264	0.81283	1.0327	1.33703
PAIP1	Polyadenylate-binding protein-interacting protein 1	Q9H074;Q9H074-2	Q9H074;Q9H074-2		0.63616	0.734	0.86643	0.81242	0.89434	0.86907	0.66169	0.70418	1.0756	0.99465	0.90428	0.8909	1.0016	5	5	6	9	6	6	7	8	8	8	8	5	5	5	6	9	6	6	7	8	8	8	8	5	40.5	40.5	40.5	0.86907	0.86643	0.81242	1.0016	1.00305
EEF1D	Elongation factor 1-delta	P29692-2;P29692;P29692-3	P29692-2;P29692;P29692-3		0.580689	0.82949	0.86482	0.81092	0.86833	1.0126	0.7353	0.72924	1.0425	1.0037	0.96237	0.89687	0.96437	5	7	6	7	5	6	6	5	8	6	8	5	5	7	6	7	5	6	6	5	8	6	8	5	21	21	21	1.0037	0.86482	0.81092	0.96437	1.16059
UBAP2	Ubiquitin-associated protein 2	Q5T6F2	Q5T6F2	+	1.3794	NaN	0.73527	0.80959	1.0679	0.98324	0.66039	0.62366	1.4341	0.90941	0.83641	0.94605	NaN	1	5	3	5	2	5	5	2	7	6	7	1	1	5	3	5	2	5	5	2	7	6	7	1	15.8	15.8	15.8	0.946325	0.73527	0.80959	1.251	1.28704
EEF1A1;EEF1A1P5	Elongation factor 1-alpha 1;Putative elongation factor 1-alpha-like 3	P68104;Q5VTE0	P68104;Q5VTE0		1.23643	0.81165	0.74184	0.80944	0.87955	0.89064	0.69724	0.72935	1.0252	0.96217	0.86841	0.88664	1.0319	13	18	18	16	17	15	17	12	17	14	15	12	6	10	10	11	10	8	9	4	10	8	9	5	63.4	63.4	41.3	0.89064	0.74184	0.80944	1.0252	1.20058
BZW1	Basic leucine zipper and W2 domain-containing protein 1	Q7L1Q6-3;Q7L1Q6-4;Q7L1Q6;Q7L1Q6-2	Q7L1Q6-3;Q7L1Q6-4;Q7L1Q6;Q7L1Q6-2		0.824496	0.87085	0.7947	0.80935	1.0072	1.0305	0.72536	0.74639	1.0002	1.0079	0.93617	0.97914	0.92914	2	7	4	5	4	4	4	6	6	7	7	4	2	5	2	4	4	2	4	4	6	6	7	3	23.7	23.7	20.8	1.0079	0.7947	0.80935	1.0002	1.26828
FKBP4	Peptidyl-prolyl cis-trans isomerase FKBP4;Peptidyl-prolyl cis-trans isomerase FKBP4, N-terminally processed	Q02790	Q02790		0.583418	NaN	0.739	0.80902	0.88963	0.93726	NaN	0.79862	1.1497	0.99086	0.92833	0.87363	NaN	1	5	2	6	4	0	2	3	5	5	10	1	1	5	2	6	4	0	2	3	5	5	10	1	33.8	33.8	33.8	0.96406	0.833665	0.80902	1.01967	1.15641
CLIC1	Chloride intracellular channel protein 1	O00299;Q9NZA1;Q9NZA1-2;O15247	O00299		0.723301	0.88592	0.75975	0.80712	0.76327	1.1148	0.68589	0.74526	1.0134	1.1113	0.99249	0.8846	1.03	6	7	5	7	7	5	8	7	8	7	9	5	5	6	4	7	7	4	8	6	7	6	9	4	66.8	66.8	64.3	1.1113	0.75975	0.80712	1.0134	1.46272
TARS	Threonine--tRNA ligase, cytoplasmic	P26639;A2RTX5;A2RTX5-2	P26639		1.08989	0.79686	0.71091	0.80702	0.82946	0.89269	0.65991	0.6919	0.92403	0.9347	0.83243	0.83462	0.93029	22	25	29	26	26	24	23	18	29	27	26	23	22	25	29	26	26	24	23	18	29	27	26	23	55.2	55.2	55.2	0.89269	0.71091	0.80702	0.92403	1.2557
THUMPD3	THUMP domain-containing protein 3	Q9BV44	Q9BV44		1.19456	0.70595	0.57645	1.0411	0.90833	0.82512	0.68382	0.69207	0.96517	0.71784	0.63238	0.80526	NaN	4	5	2	6	3	4	6	3	6	8	5	0	4	5	2	6	3	4	6	3	6	8	5	0	36.1	36.1	36.1	0.71784	0.63238	0.80526	0.93675	1.13514
CAPNS1	Calpain small subunit 1	P04632;Q96L46	P04632		0.981123	NaN	0.71294	NaN	0.73011	0.99383	NaN	0.73551	NaN	1.0569	0.9019	0.87383	0.76025	0	3	1	5	4	0	3	1	3	5	5	2	0	3	1	5	4	0	3	1	3	5	5	2	29.1	29.1	29.1	1.02536	0.80742	0.80467	0.74518	1.26993
BUB3	Mitotic checkpoint protein BUB3	O43684;O43684-2	O43684;O43684-2		1.28651	0.78701	0.75097	0.80412	0.92628	0.77624	0.69715	0.72279	1.0789	0.88648	0.85069	0.92188	0.94326	5	7	7	9	8	5	6	4	8	8	9	4	5	7	7	9	8	5	6	4	8	8	9	4	40.9	40.9	40.9	0.78701	0.75097	0.80412	0.94326	1.04799
RPL3	60S ribosomal protein L3	P39023;Q92901	P39023		0.374381	NaN	NaN	NaN	0.99948	0.86239	NaN	0.69617	NaN	1.0041	0.96166	0.91194	NaN	0	1	1	3	2	1	3	1	6	3	4	1	0	1	1	3	2	1	3	1	6	3	4	1	23.1	23.1	23.1	0.933245	0.96166	0.804055	0.99948	0.970452
HNRNPL	Heterogeneous nuclear ribonucleoprotein L	P14866;P14866-2	P14866;P14866-2	+	1.90218	0.94141	0.83911	0.80403	0.97809	0.98817	0.73206	0.70375	1.1369	1.098	0.89132	0.91334	1.1269	9	11	12	11	12	8	11	13	10	13	15	10	8	10	11	11	11	8	10	13	9	12	14	9	44.3	44.3	43.1	0.98817	0.83911	0.80403	1.1269	1.17764
RPL9	60S ribosomal protein L9	P32969	P32969		0.0472716	NaN	0.61355	0.80231	0.68418	NaN	0.8204	0.61697	0.86876	1.0452	NaN	0.81729	NaN	1	2	3	2	0	3	3	4	3	1	4	1	1	2	3	2	0	3	3	4	3	1	4	1	53.6	53.6	53.6	1.0452	0.716975	0.80231	0.77647	1.45779
ARF4	ADP-ribosylation factor 4	P18085	P18085	+	1.77922	0.93774	0.80508	0.80222	0.76676	1.0942	0.7036	0.67234	0.85708	1.0509	0.87899	0.80383	0.93176	3	5	4	5	5	5	4	4	5	6	5	3	3	4	3	4	4	4	3	3	4	5	5	2	45.6	45.6	27.8	1.0509	0.80508	0.80222	0.85708	1.30534
IPO7	Importin-7	O95373	O95373		1.12984	0.85578	0.7222	0.80207	0.90114	0.90978	0.68677	0.68647	1.054	0.99436	0.91185	0.91703	1.0639	15	21	15	18	16	18	19	13	19	21	20	10	14	20	14	17	15	17	18	12	18	20	19	10	33.7	33.7	32.8	0.90978	0.7222	0.80207	1.054	1.25973
TNPO1	Transportin-1	Q92973;Q92973-2;Q92973-3;O14787-2;O14787	Q92973;Q92973-2;Q92973-3		1.28047	0.93484	0.80017	0.80188	0.87	1.0492	0.69723	0.71027	0.9917	1.1245	0.95707	0.88108	0.96427	7	17	15	20	15	14	16	10	15	15	19	7	7	17	15	20	15	14	16	10	15	15	19	7	37.9	37.9	37.9	1.0492	0.80017	0.80188	0.96427	1.31122
NCL	Nucleolin	P19338	P19338		0.480363	NaN	1.1145	0.73604	0.88529	NaN	0.71597	0.83426	0.80367	1.279	1.2802	0.80123	NaN	0	3	3	4	1	3	4	2	3	3	3	2	0	3	3	4	1	3	4	2	3	3	3	2	7.2	7.2	7.2	1.279	1.1145	0.80123	0.84448	1.1476
CSDE1	Cold shock domain-containing protein E1	O75534;O75534-2	O75534;O75534-2		0.516845	0.7873	0.80521	0.80076	0.87535	0.89966	0.70529	0.71715	0.97762	1.005	0.90743	0.90457	0.93745	9	14	11	16	14	12	19	14	16	18	18	9	9	14	11	16	14	12	19	14	16	18	18	9	35.8	35.8	35.8	0.89966	0.80521	0.80076	0.93745	1.1173
FAM203B;FAM203A	Protein FAM203B;Protein FAM203A	P0CB43;Q9BTY7	P0CB43;Q9BTY7	+	1.47323	1.1063	NaN	0.84222	1.0024	0.89938	NaN	0.74602	1.1629	0.98597	0.80457	0.79914	NaN	2	1	2	5	4	1	2	3	2	3	6	1	2	1	2	5	4	1	2	3	2	3	6	1	36.2	36.2	36.2	0.98597	0.80457	0.79914	1.08265	1.22546
EIF2S1	Eukaryotic translation initiation factor 2 subunit 1	P05198	P05198		0.293689	NaN	NaN	NaN	NaN	0.83719	NaN	0.69756	NaN	0.93173	0.90251	0.89596	0.8034	1	0	2	1	2	1	3	0	5	3	4	2	1	0	2	1	2	1	3	0	5	3	4	2	29.8	29.8	29.8	0.88446	0.90251	0.79676	0.8034	0.98
SNX1	Sorting nexin-1	Q13596;Q13596-2	Q13596;Q13596-2		0.170535	NaN	0.75625	0.79541	0.97062	1.0395	NaN	0.19271	NaN	0.792	0.75476	0.98223	NaN	1	3	2	4	3	1	3	1	3	4	8	0	0	2	1	3	2	0	1	1	2	3	6	0	27.8	27.8	23.8	0.91575	0.755505	0.79541	0.97062	1.2121
MAP2K1	Dual specificity mitogen-activated protein kinase kinase 1	Q02750;Q02750-2	Q02750;Q02750-2	+	1.39895	NaN	0.76447	0.79409	0.88745	0.97778	NaN	0.73178	1.0411	1.0011	NaN	0.86553	1.0654	0	5	3	5	4	1	4	3	2	1	4	2	0	4	3	3	3	1	3	3	2	1	4	2	18.3	18.3	13.2	0.98944	0.76447	0.79409	1.0411	1.29428
STIP1	Stress-induced-phosphoprotein 1	P31948	P31948		1.26245	0.88273	0.75847	0.79402	0.87488	0.99516	0.80796	0.69571	1.1062	1.0296	0.90597	0.83309	0.93106	3	6	6	6	4	4	6	3	10	13	9	5	3	6	6	6	4	4	6	3	10	13	9	5	34.8	34.8	34.8	0.99516	0.80796	0.79402	0.93106	1.23169
PA2G4	Proliferation-associated protein 2G4	Q9UQ80	Q9UQ80		0.929238	0.95993	0.71078	0.79273	0.85083	0.90464	0.6436	0.57553	1.0157	0.73026	0.77377	0.84507	0.90037	2	3	3	4	3	5	3	3	3	6	5	3	2	3	3	4	3	5	3	3	3	6	5	3	24.6	24.6	24.6	0.90464	0.71078	0.79273	0.90037	1.27274
HNRNPD	Heterogeneous nuclear ribonucleoprotein D0	Q14103;Q14103-2;Q14103-3;Q14103-4;O14979;O14979-2;O14979-3	Q14103;Q14103-2;Q14103-3;Q14103-4	+	1.90571	1.031	0.91252	0.79176	0.97551	1.137	0.79141	0.68199	1.0331	1.1302	0.97417	0.93295	1.0684	2	3	3	2	3	3	3	3	3	3	3	3	2	3	3	2	3	3	3	3	3	3	3	3	9	9	9	1.1302	0.91252	0.79176	1.0331	1.23855
SSSCA1	Sjoegren syndrome/scleroderma autoantigen 1	O60232	O60232	+	2.62138	NaN	0.76827	0.79135	1.0882	0.88433	0.65983	0.71527	1.2453	0.95195	0.75811	0.93615	1.111	1	2	2	2	2	3	2	3	3	2	2	2	1	2	2	2	2	3	2	3	3	2	2	2	22.1	22.1	22.1	0.91814	0.75811	0.79135	1.111	1.21109
GCN1L1	Translational activator GCN1	Q92616	Q92616		0.849464	NaN	0.85162	0.53033	1.059	1.2259	NaN	0.7906	NaN	1.144	0.98274	1.0001	NaN	0	4	2	9	4	1	4	0	7	10	9	1	0	4	2	9	4	1	4	0	7	10	9	1	13.7	13.7	13.7	1.18495	0.91718	0.7906	1.059	1.29195
TUBA1C	Tubulin alpha-1C chain	Q9BQE3	Q9BQE3	+	1.82627	0.57925	0.62958	0.79044	1.1184	NaN	0.49387	NaN	1.1881	0.74762	NaN	NaN	NaN	2	2	3	2	1	2	1	2	2	1	1	1	1	1	2	1	0	1	0	1	1	1	0	0	67.3	12	9.1	0.663435	0.561725	0.79044	1.15325	1.18107
MAT2A	S-adenosylmethionine synthase isoform type-2	P31153;Q00266	P31153		0.42728	NaN	0.68706	NaN	0.63663	0.9481	NaN	0.70065	NaN	0.95757	0.89617	0.87899	NaN	1	2	1	2	2	1	3	0	2	2	2	1	1	2	1	2	2	1	3	0	2	2	2	1	11.1	11.1	11.1	0.952835	0.791615	0.78982	0.63663	1.20366
FERMT2	Fermitin family homolog 2	Q96AC1-3;Q96AC1;Q96AC1-2;Q9BQL6;Q9BQL6-2;Q9BQL6-4	Q96AC1-3;Q96AC1;Q96AC1-2	+	3.2336	0.83559	0.65765	0.78964	1.1772	0.92679	0.69892	0.74375	1.2038	1.0435	0.86001	0.85763	1.1808	4	12	7	11	11	7	8	4	11	10	14	3	4	12	7	11	11	7	8	4	11	10	14	3	40.2	40.2	40.2	0.92679	0.69892	0.78964	1.1808	1.32603
HSP90AA1	Heat shock protein HSP 90-alpha	P07900-2;P07900;Q14568;Q58FG0	P07900-2;P07900		0.776084	0.81695	0.75459	0.78908	0.80738	0.92043	0.6818	0.7002	0.88572	0.96755	0.85737	0.8664	0.92259	16	19	18	20	18	18	19	20	20	20	17	18	15	18	17	19	17	17	18	19	20	20	16	17	55.2	40.4	39.6	0.92043	0.75459	0.78908	0.88572	1.21978
PABPC1	Polyadenylate-binding protein 1	P11940;P11940-2;Q9H361;Q4VXU2;Q96DU9	P11940;P11940-2		0.73817	0.829	0.97336	0.78849	0.95566	0.92344	0.839	0.78251	0.92731	1.1285	1.0282	0.83485	1.044	3	6	6	7	6	9	8	5	9	10	10	7	2	5	5	6	5	8	7	4	8	9	9	6	41.2	25.2	23.4	0.92344	0.97336	0.78849	0.95566	0.948714
PDLIM5	PDZ and LIM domain protein 5	Q96HC4;Q96HC4-4;Q96HC4-2;Q96HC4-3	Q96HC4;Q96HC4-4	+	2.35108	0.97361	0.8748	0.7866	0.9422	0.98531	0.68925	0.73896	1.0374	1.0496	0.7914	0.87352	1.0163	3	6	9	12	9	9	5	4	10	7	8	5	3	6	9	12	9	9	5	4	10	7	8	5	39.1	39.1	39.1	0.98531	0.7914	0.7866	1.0163	1.24502
FLNC	Filamin-C	Q14315;Q14315-2	Q14315;Q14315-2		0.378991	0.85838	0.93846	0.78038	0.86102	0.91362	0.67883	0.72429	1.2607	1.0149	0.9438	0.9405	0.9231	6	10	8	14	3	6	6	2	6	6	9	2	6	10	8	14	3	6	6	2	6	6	9	2	18.6	13.5	13.5	0.91362	0.93846	0.78038	0.9231	0.973531
EIF3G	Eukaryotic translation initiation factor 3 subunit G	O75821	O75821		0.64665	0.78267	0.74347	0.77639	0.82508	0.86599	0.56612	0.59567	0.93467	1.077	0.82974	0.79328	NaN	3	5	6	6	4	4	4	3	3	5	6	1	3	5	6	6	4	4	4	3	3	5	6	1	30	30	30	0.86599	0.74347	0.77639	0.879875	1.16479
NSUN2	tRNA (cytosine(34)-C(5))-methyltransferase	Q08J23;Q08J23-2	Q08J23;Q08J23-2	+	1.76054	0.79847	0.71723	0.77488	0.89954	0.85474	0.67743	0.64583	1.0499	0.96519	0.80997	0.82115	0.99048	16	23	24	28	23	22	20	19	22	29	26	20	16	23	24	28	23	22	20	19	22	29	26	20	68.3	68.3	68.3	0.85474	0.71723	0.77488	0.99048	1.19172
ELAVL1	ELAV-like protein 1	Q15717;P26378-3;P26378;P26378-5;P26378-2;P26378-4;Q12926;Q12926-2	Q15717		0.211865	NaN	0.98277	0.95969	0.70038	0.87671	0.71741	0.45295	0.89892	1.0171	0.89596	0.77323	NaN	1	3	3	2	3	2	2	3	5	4	4	1	1	3	3	2	3	2	2	3	5	4	4	1	27.6	27.6	27.6	0.946905	0.89596	0.77323	0.79965	1.05686
TOP1	DNA topoisomerase 1	P11387;Q969P6;Q969P6-2	P11387		0.295981	NaN	1.0563	NaN	NaN	NaN	0.68768	0.62159	NaN	1.4531	0.99308	0.92402	NaN	0	3	0	3	3	3	2	0	4	3	6	0	0	3	0	3	3	3	2	0	4	3	6	0	16.3	16.3	16.3	1.4531	0.99308	0.772805	NaN	1.46323
EIF3E	Eukaryotic translation initiation factor 3 subunit E	P60228	P60228		1.21437	0.80046	0.68793	0.77213	0.88366	0.81434	0.61828	0.62613	1.1441	0.99761	0.88974	0.83103	1.047	3	5	5	5	5	2	4	3	5	6	6	2	3	5	5	5	5	2	4	3	5	6	6	2	29	29	29	0.81434	0.68793	0.77213	1.047	1.18375
TAGLN2	Transgelin-2	P37802;Q9UI15	P37802	+	2.16056	1.0231	0.74348	0.77035	0.75739	1.1478	0.71246	0.70944	0.8899	1.2231	0.93763	0.86015	0.90298	9	12	13	14	12	13	14	13	12	14	13	11	9	12	13	14	12	13	14	13	12	14	13	11	80.9	80.9	80.9	1.1478	0.74348	0.77035	0.8899	1.54382
GOT2	Aspartate aminotransferase, mitochondrial	P00505	P00505		1.19459	0.81867	0.7742	0.76952	1.0087	1.1481	0.86015	0.71037	1.4819	1.4673	0.96171	0.90343	1.4528	2	2	3	4	5	3	4	2	5	8	4	2	2	2	3	4	5	3	4	2	5	8	4	2	21.9	21.9	21.9	1.1481	0.86015	0.76952	1.4528	1.33477
DHX9	ATP-dependent RNA helicase A	Q08211;Q08211-2	Q08211	+	1.90104	NaN	0.60014	0.76853	0.87562	1.0209	0.69641	0.63632	0.91261	1.1793	0.83098	0.77026	NaN	0	3	4	6	5	4	6	3	8	8	8	1	0	3	4	6	5	4	6	3	8	8	8	1	16.1	16.1	16.1	1.1001	0.69641	0.76853	0.894115	1.57967
XPO1	Exportin-1	O14980	O14980	+	1.50758	0.90318	0.76977	0.76789	0.77869	0.94007	0.69877	0.69523	0.93947	0.96187	0.85755	0.80264	0.88529	9	21	16	26	18	16	22	17	22	21	24	11	9	21	16	26	18	16	22	17	22	21	24	11	42.6	42.6	42.6	0.94007	0.76977	0.76789	0.88529	1.22123
EIF2AK2	Interferon-induced, double-stranded RNA-activated protein kinase	P19525	P19525		0.774483	NaN	0.80568	0.86781	1.0113	0.90646	NaN	0.66585	1.1826	0.98088	1.1558	NaN	1.2146	1	2	3	4	3	1	2	4	3	3	1	2	1	2	3	4	3	1	2	4	3	3	1	2	15.6	15.6	15.6	0.94367	0.98074	0.76683	1.1826	0.962202
TCP1	T-complex protein 1 subunit alpha	P17987	P17987		0.986917	0.75959	0.68843	0.76657	0.80107	0.83969	0.64045	0.65424	0.93569	0.88574	0.80094	0.83292	0.89802	13	22	17	20	18	14	25	12	21	23	22	12	13	22	17	20	18	14	25	12	21	23	22	12	70.3	70.3	70.3	0.83969	0.68843	0.76657	0.89802	1.21972
RUVBL1	RuvB-like 1	Q9Y265;Q9Y265-2	Q9Y265;Q9Y265-2	+	1.51904	NaN	0.70053	0.67995	0.66267	0.97813	0.73771	0.76649	NaN	1.0213	0.76495	0.90822	NaN	1	2	3	5	2	2	5	1	5	4	3	1	1	2	3	5	2	2	5	1	5	4	3	1	28.5	28.5	28.5	0.999715	0.73771	0.76649	0.66267	1.35516
RPS2	40S ribosomal protein S2	P15880	P15880		0.8362	0.799	0.80479	0.76273	0.84963	0.99199	0.71884	0.72414	1.0089	0.99995	0.91097	0.88072	1.0892	5	6	3	4	4	6	7	5	7	6	3	5	5	6	3	4	4	6	7	5	7	6	3	5	41	41	41	0.99199	0.80479	0.76273	1.0089	1.23261
RPS20	40S ribosomal protein S20	P60866-2;P60866	P60866-2;P60866		1.08753	NaN	0.74309	NaN	0.87475	0.99477	NaN	NaN	NaN	0.93203	0.8306	0.76236	NaN	1	2	1	2	2	0	1	1	2	2	2	1	1	2	1	2	2	0	1	1	2	2	2	1	21.1	21.1	21.1	0.9634	0.786845	0.76236	0.87475	1.22438
EEF1G	Elongation factor 1-gamma	P26641	P26641		1.08255	0.73013	0.71308	0.76228	0.80409	0.77165	0.66707	0.66212	0.93951	0.85311	0.80569	0.81013	0.93826	16	24	22	23	22	21	21	18	21	21	22	17	16	24	22	23	22	21	21	18	21	21	22	17	77.1	77.1	77.1	0.77165	0.71308	0.76228	0.93826	1.08214
		P06753-2	P06753-2	+	1.94782	0.89529	0.71461	0.7602	0.88412	1.0156	0.66379	0.67192	1.0282	1.0929	0.83723	0.83543	0.94669	15	15	15	16	16	15	16	15	17	15	16	12	1	2	1	2	2	1	2	2	2	2	2	0	50	50	8.9	1.0156	0.71461	0.7602	0.94669	1.42119
KARS	Lysine--tRNA ligase	Q15046;Q15046-2	Q15046;Q15046-2		1.18714	0.8944	0.76136	0.75969	0.94663	0.89601	0.67204	0.66136	1.6799	0.83594	0.7751	0.84502	NaN	2	5	3	4	2	3	5	3	6	6	7	2	2	5	3	4	2	3	5	3	6	6	7	2	22.8	22.8	22.8	0.8944	0.76136	0.75969	1.31327	1.17474
PRDX2	Peroxiredoxin-2	P32119;P32119-2	P32119	+	1.41616	0.95169	0.85576	0.82856	0.76517	1.2147	0.67305	0.74033	0.89326	1.0352	0.93419	0.75845	0.90077	4	3	4	3	4	4	3	4	3	5	4	2	4	3	4	3	4	4	3	4	3	5	4	2	28.8	23.2	23.2	1.0352	0.85576	0.75845	0.89326	1.20968
FLAD1	FAD synthase;Molybdenum cofactor biosynthesis protein-like region;FAD synthase region	Q8NFF5;Q8NFF5-2;Q8NFF5-3;Q8NFF5-5;Q8NFF5-4	Q8NFF5;Q8NFF5-2;Q8NFF5-3;Q8NFF5-5;Q8NFF5-4		1.06978	0.6457	0.69821	0.75741	0.9791	0.75568	0.64724	0.67764	0.98757	0.7518	0.92734	0.84841	NaN	3	3	4	2	7	3	8	5	5	4	3	1	3	3	4	2	7	3	8	5	5	4	3	1	31.9	31.9	31.9	0.7518	0.69821	0.75741	0.983335	1.07675
PPME1	Protein phosphatase methylesterase 1	Q9Y570;Q9Y570-2;Q9Y570-3	Q9Y570;Q9Y570-2	+	1.31499	0.7725	0.73726	0.75655	0.8399	0.98566	0.68928	0.64248	0.85222	1.052	0.75186	0.80532	0.92147	4	7	5	5	6	4	7	5	4	6	8	4	4	7	5	5	6	4	7	5	4	6	8	4	32.1	32.1	32.1	0.98566	0.73726	0.75655	0.85222	1.33692
LUC7L3	Luc7-like protein 3	O95232;O95232-2	O95232	+	1.33003	NaN	0.66262	NaN	0.97192	0.93762	0.64324	0.67424	1.0952	NaN	0.81797	0.82975	NaN	1	2	1	3	3	3	3	2	2	3	2	1	1	2	1	3	3	3	3	2	2	3	2	1	12	12	12	0.93762	0.66262	0.751995	1.03356	1.41502
LPP	Lipoma-preferred partner	Q93052	Q93052		0.887053	NaN	0.6741	0.75026	0.86341	0.89577	0.73005	0.70924	0.98526	0.9611	0.85276	0.8889	NaN	1	7	3	5	5	4	5	3	6	8	6	1	1	7	3	5	5	4	5	3	6	8	6	1	24.2	24.2	24.2	0.928435	0.73005	0.75026	0.924335	1.27174
RPL18	60S ribosomal protein L18	Q07020	Q07020		0	NaN	0.89652	NaN	0.81601	NaN	0.9305	0.74961	NaN	1.2432	0.78896	NaN	NaN	0	3	1	4	1	2	5	0	2	2	1	0	0	3	1	4	1	2	5	0	2	2	1	0	34.6	34.6	34.6	1.2432	0.89652	0.74961	0.81601	1.3867
SERPINH1	Serpin H1	P50454	P50454		0.750466	NaN	0.67665	0.78435	0.87659	0.85543	NaN	0.63019	NaN	0.96437	0.8414	0.74941	NaN	1	2	2	2	3	1	5	0	3	3	7	0	1	2	2	2	3	1	5	0	3	3	7	0	31.8	31.8	31.8	0.9099	0.759025	0.74941	0.87659	1.19877
EIF3C	Eukaryotic translation initiation factor 3 subunit C	Q99613	Q99613		0.614667	NaN	NaN	0.74922	0.84273	0.91571	0.5735	0.74888	NaN	1.1019	0.83178	0.99801	NaN	0	0	3	4	2	2	4	1	5	4	4	1	0	0	3	4	2	2	4	1	5	4	4	1	11.2	11.2	11.2	1.00881	0.70264	0.74922	0.84273	1.43574
TRIM25	E3 ubiquitin/ISG15 ligase TRIM25	Q14258	Q14258		1.2322	NaN	0.69005	0.74841	0.75985	0.92376	0.64513	0.64004	NaN	0.96962	0.82861	0.81112	NaN	1	8	4	8	5	2	8	1	7	11	9	1	1	8	4	8	5	2	8	1	7	11	9	1	33.5	33.5	33.5	0.94669	0.69005	0.74841	0.75985	1.37192
PABPC4	Polyadenylate-binding protein 4	Q13310-3;Q13310;Q13310-2	Q13310-3;Q13310;Q13310-2	+	1.64369	0.72343	0.70259	0.7449	0.8484	0.82978	0.61164	0.67749	1.0575	0.92397	0.80517	0.74768	1.0546	6	12	7	12	10	10	16	13	19	17	14	4	1	6	4	8	5	5	8	6	9	9	8	3	37.9	37.9	19.2	0.82978	0.70259	0.7449	1.0546	1.18103
HSPA4	Heat shock 70 kDa protein 4	P34932;REV__Q3KQV9	P34932	+	1.65718	0.92654	0.7445	0.74414	0.83453	1.0033	0.68013	0.70164	0.81412	1.0745	0.83806	0.87996	0.96094	5	8	9	11	7	5	8	4	12	11	13	5	5	8	8	10	7	5	8	4	12	11	13	5	44.6	41.9	40	1.0033	0.7445	0.74414	0.83453	1.34762
EIF5A;EIF5AL1	Eukaryotic translation initiation factor 5A-1;Eukaryotic translation initiation factor 5A-1-like	P63241-2;P63241;Q6IS14;Q9GZV4	P63241-2;P63241;Q6IS14	+	2.19888	1.0121	0.73082	0.7427	0.76343	1.1223	0.70037	0.68939	0.82175	1.2224	0.90142	0.85838	0.92887	7	9	8	8	9	7	8	6	8	8	10	8	7	9	8	8	9	7	8	6	8	8	10	8	69	69	69	1.1223	0.73082	0.7427	0.82175	1.53567
APEX1	DNA-(apurinic or apyrimidinic site) lyase;DNA-(apurinic or apyrimidinic site) lyase, mitochondrial	P27695	P27695		0.345342	0.81699	0.64897	NaN	0.79284	NaN	0.6837	NaN	NaN	0.85258	0.90329	0.74249	NaN	2	2	1	2	1	2	1	0	5	3	3	1	2	2	1	2	1	2	1	0	5	3	3	1	32.4	32.4	32.4	0.834785	0.6837	0.74249	0.79284	1.22098
EIF3L	Eukaryotic translation initiation factor 3 subunit L	Q9Y262	Q9Y262		0.546088	NaN	0.68468	NaN	0.86416	0.86254	0.85336	0.58265	1.1329	0.99712	0.94648	0.90162	1.0551	0	2	1	3	3	5	2	3	8	10	7	2	0	2	1	3	3	5	2	3	8	10	7	2	29.6	29.6	29.6	0.92983	0.85336	0.742135	1.0551	1.08961
CCT5	T-complex protein 1 subunit epsilon	P48643	P48643	+	1.69897	0.7583	0.6741	0.74156	0.86445	0.78849	0.65642	0.68198	1.0591	0.87483	0.83549	0.81965	1.0645	11	14	18	16	19	15	18	12	19	17	18	9	11	14	18	16	19	15	18	12	19	17	18	9	64.7	64.7	64.7	0.78849	0.6741	0.74156	1.0591	1.16969
EPRS	Bifunctional glutamate/proline--tRNA ligase;Glutamate--tRNA ligase;Proline--tRNA ligase	P07814;P98196	P07814	+	1.31094	0.68372	0.67009	0.73877	0.85509	0.8224	0.63704	0.66027	0.91632	0.82744	0.80066	0.80697	0.91501	20	38	36	48	42	33	31	27	44	41	46	23	20	38	36	48	42	33	31	27	44	41	46	23	55	55	55	0.8224	0.67009	0.73877	0.91501	1.2273
HSP90AB1	Heat shock protein HSP 90-beta	P08238;Q58FF7	P08238		1.18402	0.849	0.72782	0.73786	0.76596	0.93931	0.69225	0.66136	0.88661	0.98226	0.85005	0.8313	0.88849	30	37	38	40	37	36	36	37	38	37	41	36	15	21	20	23	21	21	22	21	20	21	22	19	66.9	66.9	45.2	0.93931	0.72782	0.73786	0.88661	1.29058
CAPN2	Calpain-2 catalytic subunit	P17655;P17655-2;A6NHC0	P17655;P17655-2		1.14267	0.82403	0.69388	0.73761	0.70206	0.85458	0.63563	0.62288	0.79195	0.92387	0.75924	0.77899	0.88988	4	11	9	14	12	6	10	7	10	12	13	7	4	11	9	14	12	6	10	7	10	12	13	7	34	34	34	0.85458	0.69388	0.73761	0.79195	1.2316
ANP32A	Acidic leucine-rich nuclear phosphoprotein 32 family member A	P39687;O43423;O95626	P39687		0.441344	0.83993	NaN	0.61996	NaN	1.0471	0.66185	0.73424	1.0101	NaN	0.90691	0.85772	NaN	3	1	2	1	2	2	4	3	1	3	2	1	2	0	1	0	0	1	2	2	0	1	1	1	22.9	22.9	11.2	0.943515	0.78438	0.73424	1.0101	1.20288
CPNE1	Copine-1	Q99829	Q99829		0.735936	0.80173	0.69775	0.73399	0.74593	0.83768	0.62755	0.64382	0.89774	0.92553	0.81527	0.83201	0.84663	6	9	10	8	7	6	10	8	10	8	10	6	6	9	10	8	7	6	10	8	10	8	10	6	26.3	26.3	26.3	0.83768	0.69775	0.73399	0.84663	1.20054
SRPK1	SRSF protein kinase 1	Q96SB4;Q96SB4-3;Q9UPE1;Q9UPE1-4;Q9UPE1-3;Q9UPE1-2	Q96SB4;Q96SB4-3		0.715986	0.7826	0.76006	0.79497	0.77712	0.91435	NaN	0.64862	0.89051	0.93083	0.83437	0.73158	NaN	2	3	4	5	3	1	2	4	6	5	5	1	1	2	3	3	1	1	1	3	4	3	3	0	24.7	24.7	21.5	0.91435	0.797215	0.73158	0.833815	1.14693
TXNDC5	Thioredoxin domain-containing protein 5	Q8NBS9	Q8NBS9		0.998199	NaN	0.5806	NaN	0.30963	NaN	NaN	0.85883	0.3684	NaN	0.74704	0.60264	NaN	0	4	1	5	1	2	2	2	1	6	5	1	0	4	1	5	1	2	2	2	1	6	5	1	22.9	22.9	22.9	NaN	0.66382	0.730735	0.339015	#VALUE!
SERBP1	Plasminogen activator inhibitor 1 RNA-binding protein	Q8NC51;Q8NC51-3;Q8NC51-2;Q8NC51-4	Q8NC51;Q8NC51-3;Q8NC51-2;Q8NC51-4		0.541363	NaN	0.55964	NaN	0.78468	NaN	NaN	NaN	NaN	0.84249	0.77041	0.72891	0.87423	1	2	0	4	1	0	0	1	4	4	6	2	1	2	0	4	1	0	0	1	4	4	6	2	27	27	27	0.84249	0.665025	0.72891	0.829455	1.26685
RPS3A	40S ribosomal protein S3a	P61247	P61247	+	1.49111	0.87556	0.81747	0.72764	0.78865	0.99393	0.67441	0.61749	0.88671	0.96711	0.84385	0.80338	0.8329	6	4	6	7	8	4	3	6	4	6	9	6	6	4	6	7	8	4	3	6	4	6	9	6	39.8	39.8	39.8	0.96711	0.81747	0.72764	0.8329	1.18305
RNH1	Ribonuclease inhibitor	P13489	P13489		0.609954	NaN	0.69489	0.74191	0.64718	0.86602	0.55227	0.61323	0.85078	0.86715	0.77632	0.72702	NaN	0	4	5	9	6	3	8	6	7	7	7	1	0	4	5	9	6	3	8	6	7	7	7	1	55.1	55.1	55.1	0.866585	0.69489	0.72702	0.74898	1.24708
SHMT2	Serine hydroxymethyltransferase, mitochondrial	P34897;P34897-2;P34897-3	P34897;P34897-2;P34897-3		1.23914	0.75277	0.70737	0.72673	0.85464	0.85838	0.58803	0.69032	0.99292	0.92997	0.81107	0.75066	0.84352	5	5	7	9	7	5	7	4	7	11	11	2	5	5	7	8	6	5	6	4	7	11	11	2	46.8	46.8	44	0.85838	0.70737	0.72673	0.85464	1.21348
RPL23	60S ribosomal protein L23	P62829	P62829		0.708431	0.80014	0.67436	0.7261	0.64625	1.1173	0.68722	0.54288	0.81337	0.93145	0.87927	0.82114	NaN	3	3	3	2	2	2	2	2	2	2	4	1	3	3	3	2	2	2	2	2	2	2	4	1	43.6	43.6	43.6	0.93145	0.68722	0.7261	0.72981	1.35539
HPRT1	Hypoxanthine-guanine phosphoribosyltransferase	P00492;Q9NRG1;Q9NRG1-2	P00492		1.21393	0.75265	0.68825	0.72551	0.7913	0.82078	0.61926	0.6583	0.95708	0.86825	0.78881	0.80248	0.90761	5	8	5	8	7	7	7	5	8	8	7	4	5	8	5	8	7	7	7	5	8	8	7	4	66.5	66.5	66.5	0.82078	0.68825	0.72551	0.90761	1.19256
CHORDC1	Cysteine and histidine-rich domain-containing protein 1	Q9UHD1;Q9UHD1-2	Q9UHD1;Q9UHD1-2	+	1.33201	0.73594	0.57525	0.72318	0.70461	0.79842	0.56596	0.53444	0.7713	0.79907	0.67631	0.71952	0.80006	3	8	6	10	7	6	7	7	10	7	9	6	3	8	6	10	7	6	7	7	10	7	9	6	56	56	56	0.79842	0.57525	0.71952	0.7713	1.38795
TUFM	Elongation factor Tu, mitochondrial	P49411	P49411		1.1969	0.82379	0.70845	0.71311	0.78747	0.88892	0.67469	0.71925	0.93074	0.946	0.79899	0.84823	0.84958	9	11	10	12	12	8	11	8	13	12	12	6	9	11	10	12	12	8	11	8	13	12	12	6	53.8	53.8	53.8	0.88892	0.70845	0.71925	0.84958	1.25474
PSMC2	26S protease regulatory subunit 7	P35998	P35998		1.04815	0.99195	0.86469	NaN	1.0247	1.1224	0.89331	NaN	1.3445	1.0907	0.94104	0.71628	NaN	2	4	0	2	3	2	1	3	3	4	3	1	2	4	0	2	3	2	1	3	3	4	3	1	31.4	31.4	31.4	1.0907	0.89331	0.71628	1.1846	1.22096
RPS6	40S ribosomal protein S6	P62753	P62753		0.0611226	0.62521	NaN	0.71475	0.73407	0.85865	0.65256	0.70655	1.0906	1.2414	0.94302	0.91589	NaN	2	0	2	2	3	2	3	2	2	5	3	1	2	0	2	2	3	2	3	2	2	5	3	1	21.3	21.3	21.3	0.85865	0.79779	0.71475	0.912335	1.07629
IARS	Isoleucine--tRNA ligase, cytoplasmic	P41252	P41252		0.563937	0.83826	0.74239	0.71429	0.82971	0.87264	0.70343	0.67297	0.96458	0.98208	0.90993	0.87439	NaN	4	4	4	7	7	3	6	5	6	5	7	1	4	4	4	7	7	3	6	5	6	5	7	1	15.3	15.3	15.3	0.87264	0.74239	0.71429	0.897145	1.17545
RPL28	60S ribosomal protein L28	P46779-2;P46779	P46779-2;P46779		0.162481	NaN	NaN	0.6184	0.7128	NaN	NaN	0.71132	NaN	1.1775	NaN	0.8429	0.65907	0	1	2	2	1	1	3	1	2	2	3	2	0	1	2	2	1	1	3	1	2	2	3	2	21.5	21.5	21.5	1.1775	NaN	0.71132	0.685935	#VALUE!
FARSB	Phenylalanine--tRNA ligase beta subunit	Q9NSD9;REV__Q6ZSS7	Q9NSD9		0.463652	0.69737	0.62766	0.72057	0.6567	0.72986	0.62742	0.59231	0.84458	0.93035	0.74986	0.71115	0.81338	4	8	4	7	8	3	9	5	7	8	7	3	4	8	4	7	8	3	9	5	7	7	7	3	23.1	23.1	22.1	0.72986	0.62766	0.71115	0.81338	1.16283
TRAP1	Heat shock protein 75 kDa, mitochondrial	Q12931	Q12931		0.319784	0.68715	0.77166	0.71067	0.73835	0.96772	0.68644	0.68439	0.75438	1.0598	0.90393	0.85922	NaN	2	5	6	7	7	3	8	2	6	10	11	0	2	5	6	7	7	3	8	2	6	10	11	0	34.5	34.5	34.5	0.96772	0.77166	0.71067	0.746365	1.25408
EIF5	Eukaryotic translation initiation factor 5	P55010	P55010	+	1.41726	NaN	0.71241	NaN	0.81438	0.95964	NaN	0.63959	0.99745	0.93819	0.70274	0.78139	0.98839	1	2	1	5	3	0	4	2	2	2	3	2	1	2	1	5	3	0	4	2	2	2	3	2	14.8	14.8	14.8	0.948915	0.707575	0.71049	0.98839	1.34108
GNB2L1	Guanine nucleotide-binding protein subunit beta-2-like 1	P63244	P63244	+	2.34687	0.95919	0.75352	0.70892	0.732	0.99437	0.69567	0.62415	0.84272	1.0753	0.84975	0.79429	0.83596	6	9	8	11	11	9	12	8	9	10	12	10	6	9	8	11	11	9	12	8	9	10	12	10	66.6	66.6	66.6	0.99437	0.75352	0.70892	0.83596	1.31963
GART	Trifunctional purine biosynthetic protein adenosine-3;Phosphoribosylamine--glycine ligase;Phosphoribosylformylglycinamidine cyclo-ligase;Phosphoribosylglycinamide formyltransferase	P22102;P22102-2	P22102;P22102-2		0.831985	0.75666	0.69488	0.70813	0.74722	0.88218	0.63396	0.65248	0.90217	0.9481	0.8017	0.80929	0.83371	13	16	20	20	18	15	21	12	19	23	17	11	13	16	20	20	18	15	21	12	19	23	17	11	49.1	49.1	49.1	0.88218	0.69488	0.70813	0.83371	1.26954
LGALS1	Galectin-1	P09382	P09382	+	2.23116	0.86158	0.70024	0.7067	0.82305	0.95249	0.62341	0.56845	0.91313	1.0693	0.76856	0.73172	0.91987	6	8	8	7	7	6	8	6	7	7	8	6	6	8	8	7	7	6	8	6	7	7	8	6	83.7	83.7	83.7	0.95249	0.70024	0.7067	0.91313	1.36023
EIF3D	Eukaryotic translation initiation factor 3 subunit D	O15371	O15371		0.873344	NaN	0.71839	0.74392	0.77794	0.94396	0.75875	0.6657	1.1923	0.94547	0.86506	NaN	1.0324	0	3	3	3	3	3	3	2	2	2	1	2	0	3	3	3	3	3	3	2	2	2	1	2	10.6	10.6	10.6	0.944715	0.75875	0.70481	1.0324	1.24509
NUDC	Nuclear migration protein nudC	Q9Y266	Q9Y266	+	1.78895	0.80541	0.6585	0.70181	0.68116	0.87578	0.55642	0.52878	0.70147	0.95028	0.69065	0.73319	0.72848	3	8	7	7	6	8	2	4	6	7	6	3	3	8	7	7	6	8	2	4	6	7	6	3	40.5	40.5	40.5	0.87578	0.6585	0.70181	0.70147	1.32996
RPL4	60S ribosomal protein L4	P36578	P36578	+	1.7103	0.88624	0.78187	0.70104	0.72738	1.0572	0.6627	0.6187	0.84339	1.1515	0.85154	0.79676	0.86651	8	10	12	13	11	12	11	12	11	12	12	10	8	10	12	13	11	12	11	12	11	12	12	10	43.8	43.8	43.8	1.0572	0.78187	0.70104	0.84339	1.35214
HSPA9	Stress-70 protein, mitochondrial	P38646	P38646	+	1.32735	0.77274	0.77635	0.69945	0.76134	0.88777	0.65441	0.65829	0.80596	0.93823	0.78906	0.73807	0.78769	5	5	8	9	5	9	10	6	11	12	9	3	5	5	8	9	5	9	10	6	11	12	9	3	34	34	34	0.88777	0.77635	0.69945	0.78769	1.14352
KPNA4	Importin subunit alpha-4	O00629	O00629		0.0146711	NaN	0.56972	0.69753	0.61033	NaN	NaN	0.55013	0.74067	1.0798	0.84466	0.78828	NaN	1	2	2	2	1	1	2	1	2	2	2	1	1	2	2	2	1	1	2	1	2	2	2	1	6	6	6	1.0798	0.70719	0.69753	0.6755	1.52689
LARP4	La-related protein 4	Q71RC2-4;Q71RC2;Q71RC2-3;Q71RC2-2	Q71RC2-4;Q71RC2;Q71RC2-3;Q71RC2-2		0.435946	NaN	0.61602	0.6431	0.67737	0.8667	0.53131	NaN	NaN	0.84877	0.8706	0.75153	NaN	1	3	2	3	3	2	1	0	3	4	5	1	1	3	2	3	3	2	1	0	3	4	5	1	13.2	13.2	13.2	0.857735	0.61602	0.697315	0.67737	1.39238
HNRNPAB	Heterogeneous nuclear ribonucleoprotein A/B	Q99729-2;Q99729-3;Q99729;Q99729-4	Q99729-2;Q99729-3;Q99729;Q99729-4		0.666337	NaN	0.66053	NaN	NaN	0.85141	NaN	0.63481	NaN	1.0287	0.83098	0.75555	NaN	1	3	0	1	2	1	2	1	3	3	3	0	1	3	0	1	2	1	2	1	3	3	3	0	10.5	10.5	10.5	0.940055	0.745755	0.69518	NaN	1.26054
EEF2	Elongation factor 2	P13639	P13639	+	1.50498	0.83187	0.63214	0.69453	0.72131	0.90553	0.60665	0.62642	0.85797	1.0114	0.77937	0.78469	0.87815	46	50	46	45	47	45	44	45	45	45	44	45	45	49	45	44	46	44	43	44	44	44	43	44	67.2	67.2	66.1	0.90553	0.63214	0.69453	0.85797	1.43248
GLS	Glutaminase kidney isoform, mitochondrial	O94925-3;O94925;O94925-2	O94925-3;O94925		0.442221	0.70191	0.83927	0.70742	0.78653	0.77536	NaN	0.66483	0.94837	1.0343	0.76881	0.69352	NaN	3	2	2	3	3	1	2	3	3	4	3	1	3	2	2	3	3	1	2	3	3	4	3	1	16.7	16.7	16.7	0.77536	0.80404	0.69352	0.86745	0.96433
RPS25	40S ribosomal protein S25	P62851	P62851		0.576923	NaN	0.84724	0.6915	NaN	NaN	0.74498	0.60338	0.89145	1.4588	0.91162	0.83043	0.79472	1	2	3	2	1	2	2	2	2	2	2	3	1	2	3	2	1	2	2	2	2	2	2	3	28	28	28	1.4588	0.84724	0.6915	0.843085	1.72183
FLNB	Filamin-B	O75369-8;O75369;O75369-9;O75369-2;O75369-3;O75369-6;O75369-7;O75369-4;O75369-5	O75369-8;O75369;O75369-9;O75369-2;O75369-3;O75369-6;O75369-7;O75369-4;O75369-5	+	2.6909	0.85011	0.69509	0.71386	0.81077	0.84385	0.60068	0.65521	0.8357	0.84692	0.73038	0.69149	0.92907	4	26	13	22	21	14	14	8	20	24	23	7	3	24	12	20	20	12	13	7	17	23	22	6	35.9	33.1	31.4	0.84692	0.69509	0.69149	0.8357	1.21843
RPS11	40S ribosomal protein S11	P62280	P62280	+	2.20749	1.0228	0.75545	0.69229	0.74768	1.0668	0.68855	0.6101	0.91164	NaN	NaN	0.68973	NaN	3	5	2	7	3	4	3	3	1	0	3	0	3	5	2	7	3	4	3	3	1	0	3	0	52.5	52.5	52.5	1.0448	0.722	0.68973	0.82966	1.44709
RPS4X	40S ribosomal protein S4, X isoform	P62701;P22090;Q8TD47	P62701	+	1.65422	0.93392	0.68876	0.68911	0.66145	0.80147	0.65207	0.61731	0.7506	0.99713	0.82753	0.71485	0.74095	6	6	9	10	7	7	12	9	10	9	11	5	6	6	9	10	7	7	12	9	10	9	11	5	51	51	51	0.93392	0.68876	0.68911	0.74095	1.35594
TXNRD1	Thioredoxin reductase 1, cytoplasmic	Q16881;Q16881-3;Q16881-4;Q16881-6;Q16881-2;Q16881-5;Q9NNW7;Q9NNW7-2	Q16881;Q16881-3;Q16881-4;Q16881-6;Q16881-2;Q16881-5		1.15011	0.80593	0.6771	0.684	0.70761	0.89133	0.6609	0.66706	0.85578	0.97797	0.79395	0.80712	0.81327	16	24	25	25	22	22	21	24	25	25	26	19	16	24	25	25	22	22	21	24	25	25	26	19	55	55	55	0.89133	0.6771	0.684	0.81327	1.31639
HSPH1	Heat shock protein 105 kDa	Q92598;Q92598-2;Q92598-3	Q92598;Q92598-2;Q92598-3		1.28084	0.76873	0.6673	0.68375	0.73831	0.88733	0.57934	0.5796	0.83522	0.98339	0.7806	0.74186	0.85658	16	21	23	28	22	22	22	18	28	26	26	16	15	18	21	25	20	19	20	17	26	23	23	14	56.5	56.5	51.5	0.88733	0.6673	0.68375	0.83522	1.32973
HNRNPA1;HNRNPA1L2	Heterogeneous nuclear ribonucleoprotein A1;Heterogeneous nuclear ribonucleoprotein A1-like 2	P09651;P09651-2;P09651-3;Q32P51	P09651;P09651-2;P09651-3;Q32P51		1.25011	0.74772	0.70084	0.68068	0.82375	0.82855	0.64204	0.63816	0.91256	0.87777	0.8399	0.77957	0.92596	9	10	11	12	13	9	9	8	10	10	11	9	9	10	11	12	13	9	9	8	10	10	11	9	36.6	36.6	36.6	0.82855	0.70084	0.68068	0.91256	1.18222
LRRC59	Leucine-rich repeat-containing protein 59	Q96AG4	Q96AG4		0	NaN	NaN	0.57383	0.84838	0.94952	NaN	0.67913	NaN	NaN	0.88322	0.8097	NaN	1	1	2	2	3	0	4	1	0	2	2	0	1	1	2	2	3	0	4	1	0	2	2	0	25.7	25.7	25.7	0.94952	0.88322	0.67913	0.84838	1.07507
DDX5	Probable ATP-dependent RNA helicase DDX5	P17844	P17844		0.834463	0.70151	0.67445	0.6779	0.75101	0.84209	0.56077	0.61593	0.8322	0.96802	0.76429	0.77924	0.93253	6	13	9	12	10	9	12	8	10	9	11	7	6	13	9	12	10	9	12	8	10	9	11	7	47.4	33.4	33.4	0.84209	0.67445	0.6779	0.8322	1.24856
CACYBP	Calcyclin-binding protein	Q9HB71	Q9HB71		0	NaN	NaN	0.67014	0.91612	NaN	0.70139	0.62928	NaN	0.98604	NaN	0.83595	NaN	0	1	2	4	1	2	2	1	2	1	3	0	0	1	2	4	1	2	2	1	2	1	3	0	22.4	22.4	22.4	0.98604	0.70139	0.67014	0.91612	1.40584
RPS9	40S ribosomal protein S9	P46781	P46781	+	1.47972	NaN	NaN	NaN	0.69018	1.0591	0.64316	0.59359	0.74882	1.0758	0.83526	0.74167	NaN	1	1	1	5	3	2	5	3	3	3	4	0	1	1	1	5	3	2	5	3	3	3	4	0	32.5	32.5	32.5	1.06745	0.73921	0.66763	0.7195	1.44404
XPOT	Exportin-T	O43592	O43592		0.785177	0.69401	0.56525	0.72484	0.68763	1.0251	NaN	0.63408	0.67038	0.99121	0.76839	0.66733	NaN	2	2	4	7	5	1	3	4	4	6	6	0	2	2	4	7	5	1	3	4	4	6	6	0	20.7	20.7	20.7	0.99121	0.66682	0.66733	0.679005	1.48647
LMNA	Prelamin-A/C;Lamin-A/C	P02545;P02545-3;P02545-2	P02545;P02545-3;P02545-2		0.0629496	NaN	NaN	0.8727	0.60201	0.54715	0.49569	0.53886	0.73798	0.77538	0.66882	0.66723	NaN	0	1	2	6	2	3	3	2	2	4	8	1	0	1	2	6	2	3	3	2	2	4	8	1	26.1	26.1	26.1	0.661265	0.582255	0.66723	0.669995	1.1357
RPLP0;RPLP0P6	60S acidic ribosomal protein P0;60S acidic ribosomal protein P0-like	P05388;Q8NHW5	P05388;Q8NHW5	+	2.41998	0.89492	0.78745	0.667	0.64833	1.018	0.64712	0.5694	0.74232	1.0938	0.78265	0.74164	0.74248	6	9	7	7	7	7	10	7	9	9	12	9	6	9	7	7	7	7	10	7	9	9	12	9	51.4	51.4	51.4	1.018	0.78265	0.667	0.74232	1.30071
RPS12	40S ribosomal protein S12	P25398	P25398	+	1.51904	0.8265	0.69318	0.66512	0.65769	0.97224	0.64796	0.5564	0.77225	1.1216	0.81929	0.74889	0.81354	7	5	6	7	7	7	6	8	7	8	7	6	7	5	6	7	7	7	6	8	7	8	7	6	70.5	70.5	70.5	0.97224	0.69318	0.66512	0.77225	1.40258
ANXA1	Annexin A1	P04083	P04083		0.626051	0.71768	0.68668	0.6635	0.74005	0.89574	0.67169	0.63758	0.88481	0.9948	0.80954	0.83329	0.87818	3	10	5	8	6	5	9	6	8	10	10	8	3	10	5	8	6	5	9	6	8	10	10	8	56.4	56.4	56.4	0.89574	0.68668	0.6635	0.87818	1.30445
HNRNPA2B1	Heterogeneous nuclear ribonucleoproteins A2/B1	P22626;P22626-2	P22626;P22626-2	+	2.01844	0.89689	0.6914	0.66342	0.82977	0.85701	0.64312	0.61123	0.89478	1.0271	0.84433	0.72059	0.91908	7	9	10	8	9	9	7	7	12	11	12	7	7	9	10	8	9	9	7	7	12	11	12	7	44.5	44.5	44.5	0.89689	0.6914	0.66342	0.89478	1.29721
RPL18A	60S ribosomal protein L18a	Q02543	Q02543	+	3.00237	0.90862	0.64355	0.66296	0.6157	0.97868	0.55394	0.53666	0.69174	0.96851	0.71851	0.67434	0.73814	3	4	6	5	4	4	4	3	5	4	5	4	3	4	6	5	4	4	4	3	5	4	5	4	35.2	35.2	35.2	0.96851	0.64355	0.66296	0.69174	1.50495
CKB	Creatine kinase B-type	P12277	P12277	+	4.53957	1.5244	0.66458	0.52614	0.41606	1.8186	0.8169	0.66052	0.43546	1.6978	1.0219	0.79218	0.5795	3	6	5	8	2	3	5	6	6	6	6	6	3	6	5	8	2	3	5	6	6	6	6	6	40.2	40.2	40.2	1.6978	0.8169	0.66052	0.43546	2.07834
CNN2	Calponin-2	Q99439;Q99439-2	Q99439;Q99439-2	+	3.05203	1.0134	0.61071	0.66031	0.81048	0.99947	0.56979	0.61445	0.95713	1.0494	0.7429	0.78796	0.94641	5	8	11	12	10	10	9	8	11	12	12	7	4	7	10	11	9	9	8	7	10	11	11	6	62.1	62.1	58.6	1.0134	0.61071	0.66031	0.94641	1.65938
RPS15A	40S ribosomal protein S15a	P62244	P62244		1.07407	0.85347	0.83148	0.65956	0.65306	0.93272	NaN	0.5744	0.85139	1.1269	0.86703	0.76099	0.93135	3	3	4	4	4	1	4	5	5	4	5	2	3	3	4	4	4	1	4	5	5	4	5	2	35.4	35.4	35.4	0.93272	0.849255	0.65956	0.85139	1.09828
ACTN1	Alpha-actinin-1	P12814;P12814-3;P12814-2;P35609	P12814;P12814-3;P12814-2		1.14768	0.76837	0.62995	0.65882	0.78086	0.81139	0.61519	0.57768	0.83251	0.95726	0.77131	0.76622	0.76507	9	12	12	16	12	13	14	12	13	12	12	3	9	12	12	16	12	13	14	12	13	12	12	3	63.3	41.4	41.4	0.81139	0.62995	0.65882	0.78086	1.28802
PRDX1	Peroxiredoxin-1	Q06830	Q06830	+	3.60656	1.029	0.67338	0.65823	0.59337	1.2061	0.61019	0.56378	0.66259	1.3477	0.73669	0.69987	0.69341	8	11	12	15	12	11	13	12	11	13	13	9	6	9	10	13	10	9	10	10	9	11	11	7	84.4	84.4	72.9	1.2061	0.67338	0.65823	0.66259	1.79111
APIP	Probable methylthioribulose-1-phosphate dehydratase	Q96GX9;Q96GX9-3	Q96GX9;Q96GX9-3	+	1.41353	0.79373	0.64483	0.6262	0.6815	0.92158	0.58448	0.65486	1.0249	1.0243	0.63603	0.77585	1.0348	3	3	4	3	4	3	4	2	3	3	4	5	3	3	4	3	4	3	4	2	3	3	4	5	33.9	33.9	33.9	0.92158	0.63603	0.65486	1.0249	1.44896
CNBP	Cellular nucleic acid-binding protein	P62633-4;P62633;P62633-5;P62633-2;P62633-3	P62633-4;P62633;P62633-5;P62633-2;P62633-3		0.243133	NaN	0.7028	NaN	0.76663	NaN	NaN	0.53201	NaN	1.2314	0.76616	0.77102	NaN	0	3	1	2	1	1	3	1	2	2	2	0	0	3	1	2	1	1	3	1	2	2	2	0	30.9	30.9	30.9	1.2314	0.73448	0.651515	0.76663	1.67656
RPL11	60S ribosomal protein L11	P62913;P62913-2	P62913;P62913-2		0.73722	0.79533	0.66838	NaN	0.69302	0.91446	0.66371	0.52646	0.82102	0.95258	0.82683	0.7729	NaN	2	2	1	2	2	2	1	2	3	4	3	1	2	2	1	2	2	2	1	2	3	4	3	1	24.2	24.2	24.2	0.91446	0.66838	0.64968	0.75702	1.36817
CDC123	Cell division cycle protein 123 homolog	O75794	O75794		0.542699	NaN	0.53058	NaN	0.8252	NaN	NaN	0.54361	0.93398	NaN	0.76448	0.75251	NaN	0	2	1	4	0	0	4	2	1	2	3	1	0	2	1	4	0	0	4	2	1	2	3	1	10.1	10.1	10.1	NaN	0.64753	0.64806	0.87959	#VALUE!
AKAP12	A-kinase anchor protein 12	Q02952;Q02952-2;Q02952-3	Q02952;Q02952-2;Q02952-3		1.14076	0.69038	0.61469	0.64714	0.73455	0.80393	0.53927	0.56627	0.79416	0.96196	0.72826	0.69879	0.86088	7	11	6	10	11	9	13	8	11	15	18	7	7	11	6	10	11	9	13	8	11	15	18	7	25	25	25	0.80393	0.61469	0.64714	0.79416	1.30786
HNRNPU	Heterogeneous nuclear ribonucleoprotein U	Q00839;Q00839-2	Q00839;Q00839-2	+	2.78097	0.88636	0.72139	0.64453	0.73094	0.92818	0.6368	0.58334	0.66964	1.062	0.7971	0.65812	0.73742	9	15	15	15	13	13	13	14	16	15	14	14	9	15	15	14	12	12	13	13	16	14	14	13	26.9	26.9	26.2	0.92818	0.72139	0.64453	0.73094	1.28665
RPS5	40S ribosomal protein S5;40S ribosomal protein S5, N-terminally processed	P46782	P46782	+	1.67526	0.83726	0.66342	0.6417	0.66826	1.0113	0.66717	0.59926	0.81157	1.0364	0.88294	0.70661	0.78509	1	3	5	5	3	2	3	4	3	5	5	2	1	3	5	5	3	2	3	4	3	5	5	2	37.7	37.7	37.7	1.0113	0.66717	0.6417	0.78509	1.51581
RPS16	40S ribosomal protein S16	P62249	P62249	+	1.61317	0.89892	0.72989	0.63506	0.68199	1.0329	0.68732	0.5869	0.84244	1.0417	0.87274	0.81065	0.84873	2	2	4	3	2	3	4	3	4	4	4	2	2	2	4	3	2	3	4	3	4	4	4	2	38.4	38.4	38.4	1.0329	0.72989	0.63506	0.84244	1.41514
PLK1	Serine/threonine-protein kinase PLK1	P53350	P53350	+	1.46016	0.46476	0.51691	NaN	1.0107	0.29602	NaN	0.65095	NaN	0.38216	0.53002	0.58773	NaN	2	4	1	2	7	0	2	1	5	3	3	0	2	4	1	2	7	0	2	1	5	3	3	0	22.1	22.1	22.1	0.38216	0.523465	0.61934	1.0107	0.730058
AHNAK	Neuroblast differentiation-associated protein AHNAK	Q09666	Q09666	+	3.19515	0.94	0.77222	0.60991	0.53274	1.0032	0.65148	0.48192	0.57959	1.094	0.83536	0.7127	0.50925	4	8	3	18	8	3	9	7	4	13	10	3	4	8	3	18	8	3	9	7	4	13	10	3	19.3	19.3	19.3	1.0032	0.77222	0.60991	0.53274	1.29911
S100A11	Protein S100-A11	P31949	P31949	+	1.92168	0.80006	0.5667	NaN	0.63755	0.9471	0.52433	0.55098	0.72377	NaN	0.62379	0.66727	0.69647	3	3	1	3	3	2	3	2	1	2	2	2	3	3	1	3	3	2	3	2	1	2	2	2	42.9	42.9	42.9	0.87358	0.5667	0.609125	0.69647	1.54152
TPT1	Translationally-controlled tumor protein;TPT1-like protein	P13693;Q56UQ5	P13693;Q56UQ5		0.298124	0.81791	NaN	NaN	0.74412	0.55146	NaN	0.43757	NaN	0.85429	0.76587	0.777	NaN	2	1	1	2	2	1	2	1	2	3	3	2	2	1	1	2	2	1	2	1	2	3	3	2	27.3	27.3	27.3	0.81791	0.76587	0.607285	0.74412	1.06795
PRMT5	Protein arginine N-methyltransferase 5;Protein arginine N-methyltransferase 5, N-terminally processed	O14744;O14744-2	O14744;O14744-2	+	1.65876	NaN	0.66978	0.48355	0.66606	1.0064	NaN	0.60249	NaN	1.0318	0.71016	0.76643	0.55702	0	7	3	4	3	1	5	1	5	7	4	2	0	7	3	4	3	1	5	1	5	7	4	2	17.3	17.3	17.3	1.0191	0.68997	0.60249	0.61154	1.47702
PPA1	Inorganic pyrophosphatase	Q15181	Q15181		1.01985	NaN	0.58029	0.60183	0.61532	0.83923	0.52653	0.5277	0.67992	0.85362	0.79252	0.70716	0.63397	1	6	6	11	7	5	7	5	8	8	10	3	1	6	6	11	7	5	7	5	8	8	10	3	74.7	74.7	74.7	0.846425	0.58029	0.60183	0.63397	1.45862
		P35080-2	P35080-2		0.369307	0.69175	0.54578	0.66807	0.63889	NaN	NaN	0.53475	0.83815	0.86025	0.76149	NaN	0.80361	2	3	3	3	1	1	3	2	2	2	1	2	1	2	2	2	0	0	2	0	1	1	0	2	32.1	32.1	12.1	0.776	0.653635	0.60141	0.80361	1.18721
EIF2S3;EIF2S3L	Eukaryotic translation initiation factor 2 subunit 3;Putative eukaryotic translation initiation factor 2 subunit 3-like protein	P41091;Q2VIR3;Q2VIR3-2	P41091;Q2VIR3;Q2VIR3-2		1.20133	0.69053	0.5482	0.60121	0.68627	0.7538	0.53504	0.56277	0.84054	0.81745	0.7018	0.72755	0.80824	9	13	12	15	13	11	14	11	10	13	13	9	9	13	12	15	13	11	14	11	10	13	13	9	51.9	51.9	51.9	0.7538	0.5482	0.60121	0.80824	1.37505
CDC37	Hsp90 co-chaperone Cdc37	Q16543	Q16543	+	1.94263	0.78904	0.59613	0.60007	0.71031	1.0448	0.55069	0.54205	0.71068	0.96671	0.78154	0.66295	0.66358	2	3	4	3	2	3	3	3	3	3	3	3	2	3	4	3	2	3	3	3	3	3	3	3	15.3	15.3	15.3	0.96671	0.59613	0.60007	0.71031	1.62164
NARS	Asparagine--tRNA ligase, cytoplasmic	O43776	O43776	+	1.35718	NaN	0.5693	0.59975	0.68248	0.85846	0.50052	0.52777	0.71992	0.84718	0.74626	0.68866	0.78662	1	4	3	7	4	4	5	5	5	4	8	3	1	4	3	7	4	4	5	5	5	4	8	3	30.1	30.1	30.1	0.85282	0.5693	0.59975	0.71992	1.49802
CDK6	Cyclin-dependent kinase 6	Q00534	Q00534		0.824891	NaN	0.82426	0.75156	0.96389	0.99626	0.4044	0.43952	0.99475	0.79141	0.54691	NaN	NaN	1	2	4	3	3	2	4	2	2	2	1	2	0	1	3	2	2	2	3	1	1	2	0	1	35	35	32.5	0.893835	0.54691	0.59554	0.97932	1.63434
CCT2	T-complex protein 1 subunit beta	P78371;P78371-2	P78371;P78371-2	+	2.48754	0.73317	0.57087	0.59412	0.70138	0.82514	0.52161	0.55724	0.80989	0.8836	0.62955	0.66359	0.81586	21	26	26	27	22	26	26	26	24	27	26	23	21	26	26	27	22	26	26	26	24	27	26	23	74	74	74	0.82514	0.57087	0.59412	0.80989	1.44541
KCTD12	BTB/POZ domain-containing protein KCTD12	Q96CX2;Q6ZWB6;Q68DU8	Q96CX2	+	1.92519	0.69025	0.59959	0.58524	0.66264	0.79415	0.50478	0.53694	0.68028	0.87833	0.62958	0.63704	0.65074	6	8	8	9	7	6	11	6	8	9	7	6	6	8	8	9	7	6	11	6	8	9	7	6	36	36	36	0.79415	0.59959	0.58524	0.66264	1.32449
RPL5	60S ribosomal protein L5	P46777	P46777		0.677716	0.74637	0.60153	NaN	NaN	NaN	0.5716	0.51619	0.86802	0.97798	0.81767	0.6473	NaN	2	3	1	0	2	4	3	2	3	4	2	0	2	3	1	0	2	4	3	2	3	4	2	0	27.9	27.9	27.9	0.862175	0.60153	0.581745	0.86802	1.4333
LRPPRC	Leucine-rich PPR motif-containing protein, mitochondrial	P42704;Q9NP80;Q9NP80-2	P42704		1.24672	0.76935	0.60412	0.57866	0.67271	0.92164	0.5944	0.56746	0.70783	0.93382	0.79512	0.72704	0.85102	7	10	13	14	10	7	14	10	14	17	22	7	7	10	13	14	10	7	14	10	14	17	22	7	31.2	31.2	31.2	0.92164	0.60412	0.57866	0.70783	1.52559
TES	Testin	Q9UGI8;Q9UGI8-2	Q9UGI8;Q9UGI8-2		0.798736	NaN	0.61264	0.57739	0.6477	0.71338	NaN	0.4917	NaN	0.88003	0.64337	0.69901	NaN	0	2	4	4	2	1	2	1	6	5	7	1	0	2	4	4	2	1	2	1	6	5	7	1	30.4	30.4	30.4	0.796705	0.628005	0.57739	0.6477	1.26863
RPS3	40S ribosomal protein S3	P23396	P23396	+	3.62492	1.0547	0.6499	0.57726	0.64362	0.97931	0.6929	0.54584	0.75047	1.0234	0.77177	0.66404	0.81261	3	6	6	12	6	5	10	3	9	11	12	6	3	6	6	12	6	5	10	3	9	11	12	6	70	70	70	1.0234	0.6929	0.57726	0.75047	1.47698
ANXA3	Annexin A3	P12429	P12429		1.12678	NaN	NaN	NaN	NaN	0.93709	NaN	0.4732	NaN	0.87955	0.87745	0.66207	0.72791	0	1	4	1	3	1	3	0	5	5	5	3	0	1	4	1	3	1	3	0	5	5	5	3	34.7	34.7	34.7	0.90832	0.87745	0.567635	0.72791	1.03518
HNRNPA3	Heterogeneous nuclear ribonucleoprotein A3	P51991	P51991	+	1.31479	NaN	0.60398	0.61863	0.6471	0.85349	0.7222	0.53119	0.61113	0.78126	0.7539	0.56012	0.80152	1	5	3	4	2	2	3	3	2	4	3	2	0	0	0	0	0	0	0	0	1	1	1	0	27.5	27.5	4.2	0.817375	0.7222	0.56012	0.6471	1.13178
BCCIP	BRCA2 and CDKN1A-interacting protein	Q9P287;Q9P287-2;Q9P287-3;Q9P287-4	Q9P287;Q9P287-2;Q9P287-3;Q9P287-4		0.416323	NaN	0.59283	0.55793	0.58073	NaN	0.50678	0.46482	0.8388	0.93645	0.69377	0.63339	NaN	1	3	3	3	1	3	3	3	2	3	3	1	1	3	3	3	1	3	3	3	2	3	3	1	23.6	23.6	23.6	0.93645	0.59283	0.55793	0.709765	1.57963
EIF3M	Eukaryotic translation initiation factor 3 subunit M	Q7L2H7	Q7L2H7		0.351268	NaN	0.61191	0.55727	0.60103	0.70659	0.58331	0.45335	0.8242	0.74455	NaN	0.7326	0.64137	1	2	2	2	2	2	2	2	4	2	4	2	1	2	2	2	2	2	2	2	4	2	4	2	25.7	25.7	25.7	0.72557	0.59761	0.55727	0.64137	1.21412
FHL2	Four and a half LIM domains protein 2	Q14192	Q14192	+	1.66615	NaN	0.51829	0.54463	0.49939	0.83048	0.50036	0.42522	0.69077	0.88167	0.63168	0.59098	NaN	0	3	3	3	2	2	2	2	2	3	3	0	0	3	3	3	2	2	2	2	2	3	3	0	26.2	26.2	26.2	0.856075	0.51829	0.54463	0.59508	1.65173
DLD	Dihydrolipoyl dehydrogenase, mitochondrial	P09622	P09622		0.13571	NaN	0.43694	NaN	0.89311	NaN	NaN	0.67522	0.5112	NaN	0.67714	0.39994	NaN	0	3	1	4	0	1	4	2	0	2	4	0	0	3	1	4	0	1	4	2	0	2	4	0	12.6	12.6	12.6	NaN	0.55704	0.53758	0.702155	#VALUE!
HSPA1A	Heat shock 70 kDa protein 1A/1B	P08107;P08107-2	P08107;P08107-2		1.19354	0.5219	0.50417	0.52348	0.59843	0.56202	0.45073	0.5147	0.7388	0.61941	0.58774	0.57969	0.64504	15	20	15	20	15	18	19	14	16	17	17	16	8	11	7	12	9	11	11	7	10	10	11	9	52.4	50.4	29.3	0.56202	0.50417	0.52348	0.64504	1.11474
DNAJA1	DnaJ homolog subfamily A member 1	P31689;Q14203;Q14203-2;REV__Q5VTR2	P31689		1.0748	0.53666	0.51521	0.49316	0.62128	0.81396	0.39858	0.48235	0.71843	0.78335	0.56614	0.65773	0.83132	5	6	6	5	4	5	6	5	5	4	5	4	5	6	6	5	4	5	6	5	5	4	5	4	34.8	34.8	34.8	0.78335	0.51521	0.49316	0.71843	1.52045
ARHGEF2	Rho guanine nucleotide exchange factor 2	Q92974;Q92974-2;Q92974-3	Q92974;Q92974-2;Q92974-3		0.336243	NaN	0.48258	NaN	0.6169	NaN	NaN	0.47192	NaN	0.76815	0.63955	0.50505	NaN	0	2	1	4	1	0	2	0	2	2	2	0	0	2	1	4	1	0	2	0	2	2	2	0	10	10	10	0.76815	0.561065	0.488485	0.6169	1.36909
AK2	Adenylate kinase 2, mitochondrial	P54819;P54819-2;P54819-5;P54819-3;P54819-6;P54819-4	P54819;P54819-2;P54819-5;P54819-3;P54819-6;P54819-4		1.11411	NaN	0.52753	0.48777	0.55566	0.6175	NaN	0.47559	NaN	0.81679	0.60198	0.5168	0.58103	1	4	4	4	3	1	4	1	3	4	4	3	1	4	4	4	3	1	4	1	3	4	4	3	52.7	52.7	52.7	0.717145	0.564755	0.48777	0.568345	1.26983
P4HB	Protein disulfide-isomerase	P07237	P07237	+	4.44809	1.1467	0.48456	0.37998	0.30334	1.3252	0.65154	0.48596	0.38196	1.298	0.78255	0.57247	0.44926	3	6	13	14	5	4	9	13	8	14	11	8	3	6	13	14	5	4	9	13	8	14	11	8	46.5	46.5	46.5	1.298	0.65154	0.48596	0.38196	1.9922
GARS	Glycine--tRNA ligase	P41250	P41250		1.21172	0.53802	0.45811	0.48349	0.5075	0.63079	0.4055	0.42204	0.57485	0.62796	0.52874	0.55219	0.5727	12	17	16	17	16	14	16	12	18	19	21	13	12	17	16	17	16	14	16	12	18	19	21	13	49.8	49.8	49.8	0.62796	0.45811	0.48349	0.5727	1.37076
KPNA2	Importin subunit alpha-2	P52292;A8MYJ9	P52292	+	3.02189	0.62655	0.41832	0.49952	0.60252	0.73093	0.40796	0.43809	0.6263	0.79841	0.49444	0.48137	0.7011	7	11	11	11	6	8	13	9	6	7	12	7	7	11	11	11	6	8	13	9	6	7	12	7	55	55	55	0.73093	0.41832	0.48137	0.6263	1.7473
WARS	Tryptophan--tRNA ligase, cytoplasmic;T1-TrpRS;T2-TrpRS	P23381;P23381-2	P23381;P23381-2		0.190933	0.37832	0.40145	0.46858	0.50499	0.51795	0.41154	0.33077	0.52761	0.66284	0.51544	0.55444	0.52944	3	5	2	5	4	4	6	2	4	8	8	4	3	5	2	5	4	4	6	2	4	8	8	4	41.8	41.8	41.8	0.51795	0.41154	0.46858	0.52761	1.25857
TGM2	Protein-glutamine gamma-glutamyltransferase 2	P21980;P21980-2;P21980-3	P21980;P21980-2		1.06155	0.55618	0.41653	0.46012	0.47977	0.51933	0.42637	0.38842	0.59834	0.70454	0.49214	0.50328	0.49678	2	7	6	7	6	6	6	4	8	10	9	4	2	7	6	7	6	6	6	4	8	10	9	4	32.8	32.8	32.8	0.55618	0.42637	0.46012	0.49678	1.30445
PSAT1	Phosphoserine aminotransferase	Q9Y617;Q9Y617-2	Q9Y617;Q9Y617-2		0.562861	0.52079	0.43738	NaN	0.4568	0.47793	NaN	0.40871	NaN	0.57088	0.50249	0.47958	NaN	2	4	1	2	3	1	5	1	6	4	4	1	2	4	1	2	3	1	5	1	6	4	4	1	38.4	38.4	38.4	0.52079	0.469935	0.444145	0.4568	1.10822
RPS27A;UBC;UBB;UBA52	Ubiquitin-40S ribosomal protein S27a;Ubiquitin;40S ribosomal protein S27a;Polyubiquitin-C;Ubiquitin;Polyubiquitin-B;Ubiquitin;Ubiquitin-60S ribosomal protein L40;Ubiquitin;60S ribosomal protein L40	P62979;P0CG48;P0CG47;P62987	P62979;P0CG48;P0CG47;P62987	+	4.97668	1.0383	0.31602	0.44069	0.59503	1.0198	0.30671	0.38319	0.72744	1.2268	0.41946	0.47265	0.70877	4	14	6	7	5	4	11	5	5	3	5	4	4	14	6	7	5	4	11	5	5	3	5	4	67.9	67.9	67.9	1.0383	0.31602	0.44069	0.70877	3.28555
TAGLN	Transgelin	Q01995	Q01995		1.27891	0.64821	0.51243	0.39667	0.52533	0.56504	0.52777	0.48382	NaN	0.77638	0.60365	0.43786	0.68521	2	4	5	5	5	3	5	0	3	4	6	3	2	4	5	5	5	3	5	0	3	4	6	3	58.2	58.2	58.2	0.64821	0.52777	0.43786	0.60527	1.22821
ANLN	Actin-binding protein anillin	Q9NQW6;Q9NQW6-2	Q9NQW6;Q9NQW6-2		0.129571	0.37946	0.71184	0.37307	0.55387	0.39324	NaN	0.90002	0.69938	0.54635	0.45492	0.40497	NaN	2	2	3	5	5	0	2	4	4	5	4	1	2	2	3	5	5	0	2	4	4	5	4	1	14.8	14.8	14.8	0.39324	0.58338	0.40497	0.626625	0.674072
PHGDH	D-3-phosphoglycerate dehydrogenase	O43175	O43175	+	3.23057	0.51563	0.33083	0.40259	0.52926	0.58894	0.31867	0.34109	0.60165	0.62421	0.40131	0.44015	0.59347	18	22	21	22	20	22	20	17	21	20	21	16	18	22	21	22	20	22	20	17	21	20	21	16	57.4	57.4	57.4	0.58894	0.33083	0.40259	0.59347	1.78019
RPL10;RPL10L	60S ribosomal protein L10;60S ribosomal protein L10-like	P27635;Q96L21	P27635;Q96L21	+	5.05166	1.0405	0.37876	0.40191	0.43103	1.175	0.37891	0.33918	0.48258	1.3537	0.45459	0.44771	0.48679	2	9	7	8	6	7	7	7	6	7	8	6	2	9	7	8	6	7	7	7	6	7	8	6	45.3	45.3	45.3	1.175	0.37891	0.40191	0.48258	3.101
PDIA3	Protein disulfide-isomerase A3	P30101	P30101	+	5.34466	0.94112	0.38086	0.34929	0.22403	1.106	0.49985	0.38508	0.2793	1.0889	0.57316	0.41226	0.30856	5	9	11	13	8	10	11	12	7	12	14	10	5	9	11	13	8	10	11	12	7	12	14	10	44.4	44.4	44.4	1.0889	0.49985	0.38508	0.2793	2.17845
PDIA6	Protein disulfide-isomerase A6	Q15084-2;Q15084	Q15084-2;Q15084		0.38588	NaN	NaN	0.21564	0.20316	NaN	NaN	0.37195	0.30665	NaN	0.58251	0.4933	NaN	0	1	2	2	0	0	3	3	1	2	4	0	0	1	2	2	0	0	3	3	1	2	4	0	16.1	16.1	16.1	NaN	0.58251	0.37195	0.254905	#VALUE!
TXN	Thioredoxin	P10599	P10599	+	5.3129	NaN	0.37385	0.32272	0.26707	0.93553	0.442	0.3568	0.32407	0.98913	0.50509	0.39119	0.33001	1	2	4	5	3	3	5	4	5	4	5	3	1	2	4	5	3	3	5	4	5	4	5	3	42.9	42.9	42.9	0.96233	0.442	0.3568	0.32407	2.17722
PC	Pyruvate carboxylase, mitochondrial	P11498	P11498	+	1.5937	0.35929	0.29497	0.29832	0.28993	0.38349	0.29122	0.26695	0.35429	0.42035	0.34448	0.32085	0.3367	18	30	27	33	27	26	32	24	28	33	39	23	18	30	27	33	27	26	32	24	28	33	39	23	49	49	49	0.38349	0.29497	0.29832	0.3367	1.3001
UBE2L3	Ubiquitin-conjugating enzyme E2 L3	P68036	P68036	+	7.04088	1.0653	0.32593	0.28945	0.26942	0.95429	0.26436	0.28173	0.29935	1.0669	0.36736	0.34263	0.30435	2	5	5	5	2	5	5	5	3	4	4	4	2	5	5	5	2	5	5	5	3	4	4	4	57.8	57.8	57.8	1.0653	0.32593	0.28945	0.29935	3.26849
PCCA	Propionyl-CoA carboxylase alpha chain, mitochondrial	P05165;P05165-2;P05165-3	P05165;P05165-2;P05165-3		0.334619	NaN	0.23588	NaN	0.27008	NaN	NaN	NaN	0.22636	0.32207	0.21802	0.25253	NaN	0	2	1	7	1	0	2	3	2	2	5	0	0	2	1	7	1	0	2	3	2	2	5	0	25.3	25.3	25.3	0.32207	0.22695	0.25253	0.24822	1.41912
FAM129A	Protein Niban	Q9BZQ8	Q9BZQ8		0.171031	0.16419	0.17761	0.3769	0.23251	0.27681	0.27202	0.2218	NaN	0.30252	0.19283	0.20994	NaN	2	4	4	6	4	2	5	1	4	5	5	1	2	4	4	6	4	2	5	1	4	5	5	1	22.6	22.6	22.6	0.27681	0.19283	0.2218	0.23251	1.43551
ASNS	Asparagine synthetase [glutamine-hydrolyzing]	P08243	P08243	+	2.18273	0.15332	0.17109	0.1914	0.21774	0.17596	0.15016	0.16653	0.25024	0.19734	0.18706	0.19245	0.24606	15	20	21	22	21	20	21	14	22	21	23	15	15	20	21	22	21	20	21	14	22	21	23	15	64.5	64.5	64.5	0.17596	0.17109	0.1914	0.24606	1.02846
MCCC1	Methylcrotonoyl-CoA carboxylase subunit alpha, mitochondrial	Q96RQ3	Q96RQ3		0.0432045	NaN	0.080955	NaN	0.083205	NaN	NaN	0.11496	0.15444	NaN	0.20997	0.1369	NaN	0	3	3	6	1	2	6	2	3	3	6	1	0	3	3	6	1	2	6	2	3	3	6	1	24	24	24	NaN	0.145462	0.12593	0.118823	#VALUE!
[truncated: 2 more columns]
